# Supplementary material for: Hydroxy-directed fluorination of remote unactivated C(sp3)–H bonds: a new age of diastereoselective radical fluorination
Source: Royal Society of Chemistry journal article supplement (doi:10.1039/d2sc01907h), 2022-01-01
Supplement: d2sc01907h1.pdf [file d2sc01907h1.pdf]

## Supporting Information

# Hydroxy-Directed Fluorination of Remote Unactivated C(sp<sup>3</sup>)-H Bonds: A New Age of Diastereoselective Radical Fluorination

Stefan Andrew Harry, Michael Richard Xiang, Eric Holt, Andrea Zhu, Fereshte Ghorbani, Dhaval Patel, and Thomas Lectka\*

*Department of Chemistry, Johns Hopkins University, 3400 N. Charles St., Baltimore, MD, 21218, United States*

### Contents:

**General Information, S1**

**General Fluorination Procedures, S2**

**Procedure for the NMR Experiment, S2**

**Starting Material Syntheses and Characterization Data, S2-S24**

**NMR Spectral Data, S25-S98**

**Computational Data, S99-S115**

**Mass Spectral Data, S116-S139**

**References, S140**

### General Information

Unless otherwise stated, all reactions were carried out under strictly anhydrous conditions and N<sub>2</sub> atmosphere. All solvents were dried and distilled by standard methods. All <sup>1</sup>H spectra were acquired on a 400 MHz NMR spectrometer in CD<sub>3</sub>CN or CDCl<sub>3</sub>, <sup>19</sup>F spectra were acquired on a 300 MHz NMR spectrometer in CDCl<sub>3</sub>, and <sup>13</sup>C NMR spectra were acquired on a 400 MHz NMR spectrometer in CDCl<sub>3</sub>. The <sup>1</sup>H and <sup>13</sup>C NMR chemical shifts are given in parts per million (δ) with respect to an internal tetramethylsilane (TMS, δ = 0.00 ppm) standard. NMR data are reported in the following format: chemical shift (integration, multiplicity (s = singlet, d = doublet, t = triplet, q = quartet, m = multiplet), coupling constants (Hz)). Spectral data were processed with Bruker software. Photochemical reactions were run in front of a 72-LED work light (Designers Edge L1923). HPLC purification (if necessary) was conducted on a Teledyne Isco CombiFlash EZ Prep system using a Dynamax-60A SiO<sub>2</sub> column and HPLC grade EtOAc and hexanes. The Gaussian '09 package was used for all calculations.<sup>1</sup>

## General Fluorination Procedure

Selectfluor (177 mg, 0.50 mmol), benzil (5.0 mg, 0.025 mmol), NaHCO<sub>3</sub> (21 mg, 0.25 mmol), and the substrate (0.25 mmol) were added to an oven-dried  $\mu\omega$  vial equipped with a stir bar; the vial was then sealed with a cap with a septum using a crimper and evacuated/refilled with N<sub>2</sub> multiple times. Anhydrous CH<sub>3</sub>CN (4 mL) was added, and the reaction mixture was irradiated with a cool white LED work light while stirring. After 14 h, a 0.3 mL aliquot was taken for <sup>19</sup>F NMR yield determination, and the rest of the reaction mixture was transferred to a separatory funnel, diluted with H<sub>2</sub>O, and extracted into CH<sub>2</sub>Cl<sub>2</sub>. The combined organic layers were washed with H<sub>2</sub>O and brine, then dried with MgSO<sub>4</sub>, filtered through Celite, and concentrated. The crude reaction mixture was purified via gradient column chromatography on silica gel eluting with EtOAc and hexanes.

## Procedure for the NMR Experiment

Selectfluor (20 mg, 0.056 mmol, 1.0 equiv.) was dissolved in 0.6 mL CD<sub>3</sub>CN in a small glass vial. The hydrogen bond acceptor (1.0 or 5.0 equiv.) was added to the vial and the contents were mixed before being transferred into an NMR tube. The <sup>1</sup>H NMR spectrum was obtained.

## Starting Material Syntheses and Characterization

### (1S,3S)- and (1R,3R)-1-(4-chlorophenyl)-3-methylcyclohexan-1-ol<sup>2</sup>

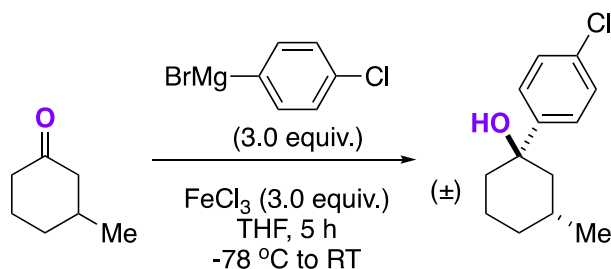

To a flame-dried three-neck round-bottom equipped with a stir bar under N<sub>2</sub> were added FeCl<sub>3</sub> (4.37 g, 27.0 mmol) and a suspension of 3-methylcyclohexanone (1.00 g, 8.93 mmol) in THF (30.0 mL). The reaction mixture was cooled to -78 °C and 1M 4-chlorophenylmagnesium bromide in Et<sub>2</sub>O (27.0 mL, 27.0 mmol) was added. The reaction mixture was slowly warmed to RT over 5 h. The reaction mixture was quenched with 1M HCl and extracted into CH<sub>2</sub>Cl<sub>2</sub> repeatedly. The combined organic layers were dried with MgSO<sub>4</sub>, filtered through Celite, and concentrated. The crude residue was purified via gradient column chromatography to provide (1S,3S)- and (1R,3R)-1-(4-chlorophenyl)-3-methylcyclohexan-1-ol (1.70 g, 85%).

White solid. <sup>1</sup>H NMR (400 MHz, CDCl<sub>3</sub>): δ 7.44-7.40 (m, 2H), 7.31-7.27 (m, 2H), 1.95-1.82 (m, 1H), 1.80-1.65 (m, 7H), 1.43-1.33 (m, 1H), 0.98-0.91 (m, 4H). <sup>13</sup>C{<sup>1</sup>H} NMR (100 MHz, CDCl<sub>3</sub>):

$\delta$  148.3, 132.4, 128.3, 126.1, 73.7, 47.7, 38.5, 34.30, 28.3, 22.6, 22.0. FTMS (ESI)  $m/z$   $C_{13}H_{17}OCl$ : calc 224.0968, observed 224.0964.

(2*R*,5*S*)-4,4,8-trimethyltricyclo[6.3.1.0<sup>2,5</sup>]dodecan-1-ol

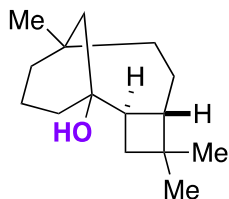

Obtained from Prof. Alex Nickon's (JHU) chemical reserves.

Spectral data matches what is reported in the literature.<sup>3</sup>

(3*aR*,4*R*,8*S*,8*aR*,9*R*)-2,2,4,8,9-pentamethyldecahydro-4,8-methanoazulen-9-ol<sup>4, 5</sup>

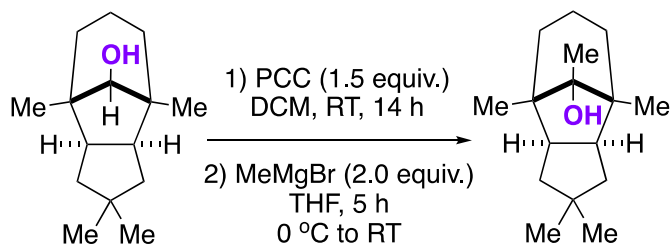

To a flame-dried three-neck round-bottom equipped with a stir bar under  $N_2$  were added apollanol (2.00 g, 9.01 mmol), DCM (25.0 mL), and PCC (2.90 g, 13.5 mmol). The reaction mixture was stirred at RT for 14 h. The reaction mixture was quenched with  $H_2O$  and extracted into  $CH_2Cl_2$  repeatedly. The combined organic layers were dried with  $MgSO_4$ , filtered through Celite, and concentrated.

To a flame-dried three-neck round-bottom equipped with a stir bar under  $N_2$  were added crude mixture from the previous reaction (1.98 g, 9.01 mmol) and THF (30.0 mL). The reaction mixture was cooled to 0 °C and 1M methylmagnesium bromide in  $Et_2O$  (18.0 mL, 18.0 mmol) was added. The reaction mixture was slowly warmed to RT over 5 h. The reaction mixture was quenched with 1M HCl and extracted into  $CH_2Cl_2$  repeatedly. The combined organic layers were dried with  $MgSO_4$ , filtered through Celite, and concentrated. The crude residue was purified via gradient column chromatography to provide (3*aR*,4*R*,8*S*,8*aR*,9*R*)-2,2,4,8,9-pentamethyldecahydro-4,8-methanoazulen-9-ol (1.66 g, 78% over two steps).

White solid.  $^1H$  NMR (400 MHz,  $CDCl_3$ ):  $\delta$  2.30-2.26 (m, 2H), 1.78-1.44 (m, 6H), 1.40-1.32 (m, 1H), 1.29-1.24 (m, 2H), 1.21-1.15 (m, 2H), 1.03 (d,  $J = 1.9$  Hz, 6H), 0.91 (s, 3H), 0.88 (s, 6H).

$^{13}\text{C}\{^1\text{H}\}$  NMR (100 MHz,  $\text{CDCl}_3$ ):  $\delta$  86.1, 50.8, 46.2, 43.9, 40.6, 38.9, 29.4, 26.9, 18.39, 18.35, 16.9. FTMS (ESI)  $m/z$   $\text{C}_{16}\text{H}_{28}\text{O}$ : calc 236.2140, observed 219.2112 (corresponds to loss of -OH).

(3*aR*,4*S*,8*R*,8*aS*,9*r*)-2,2,4,8-tetramethyldecahydro-4,8-methanoazulen-9-ol

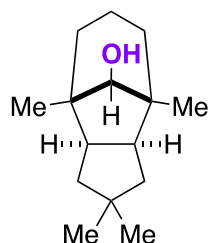

Obtained from Prof. Alex Nickon's chemical reserves.

White solid.  $^1\text{H}$  NMR (400 MHz,  $\text{CDCl}_3$ ):  $\delta$  3.26 (d,  $J = 4.8$  Hz, 1H), 2.21-2.14 (m, 2H), 1.56-1.34 (m, 6H), 1.22 (d,  $J = 5.3$  Hz, 1H), 1.07-0.98 (m, 7H), 0.89 (s, 3H), 0.85 (s, 6H).  $^{13}\text{C}\{^1\text{H}\}$  NMR (100 MHz,  $\text{CDCl}_3$ ):  $\delta$  79.2, 46.7, 43.9, 41.7, 39.6, 31.8, 29.0, 25.5, 21.0, 18.8. FTMS (ESI)  $m/z$   $\text{C}_{15}\text{H}_{26}\text{O}$ : calc 222.1984, observed 222.1985.

(5*S*,8*R*,9*S*,10*S*,13*S*,14*S*,17*S*)-17-hydroxy-10,13,17-trimethylhexadecahydro-3*H*-cyclopenta[*a*]phenanthren-3-one<sup>5, 6, 7</sup>

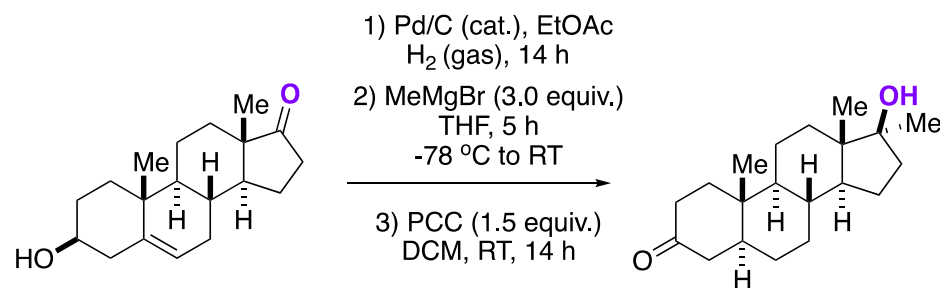

A balloon filled with hydrogen was placed over a round-bottom flask containing a solution of DHEA (5.00 g, 17.4 mmol), and 10% Pd/C (184 mg), and EtOAc (100 mL). The reaction was then stirred at RT for 14 h. The catalyst was removed by filtration through Celite, and the filtrate was concentrated. The crude residue was subjected to the next reaction without purification.

To a flame-dried three-neck round-bottom equipped with a stir bar under  $\text{N}_2$  were added crude mixture from the previous reaction (5.03 g, 17.4 mmol) and THF (60.0 mL). The reaction mixture was cooled to -78 °C and 1M methylmagnesium bromide in  $\text{Et}_2\text{O}$  (52.0 mL, 52.0 mmol) was added. The reaction mixture was slowly warmed to RT over 5 h. The reaction mixture was quenched with 1M HCl and extracted into  $\text{CH}_2\text{Cl}_2$  repeatedly. The combined organic layers were dried with  $\text{MgSO}_4$ , filtered through Celite, and concentrated. The crude residue was purified via gradient

column chromatography to provide (3*S*,8*R*,9*S*,10*S*,13*S*,14*S*,17*S*)-10,13,17-trimethylhexadecahydro-1*H*-cyclopenta[*a*]phenanthrene-3,17-diol (3.72 g, 70% over two steps).

To a flame-dried three-neck round-bottom equipped with a stir bar under N<sub>2</sub> were added (3*S*,8*R*,9*S*,10*S*,13*S*,14*S*,17*S*)-10,13,17-trimethylhexadecahydro-1*H*-cyclopenta[*a*]phenanthrene-3,17-diol (3.72 g, 12.2 mmol), DCM (50.0 mL), and PCC (3.92 g, 18.2 mmol). The reaction mixture was stirred at RT for 14 h. The reaction mixture was quenched with H<sub>2</sub>O and extracted into CH<sub>2</sub>Cl<sub>2</sub> repeatedly. The combined organic layers were dried with MgSO<sub>4</sub>, filtered through Celite, and concentrated. The crude residue was purified via gradient column chromatography to provide (8*R*,9*S*,10*S*,13*S*,14*S*,17*S*)-17-hydroxy-10,13,17-trimethylhexadecahydro-3*H*-cyclopenta[*a*]phenanthren-3-one (3.14 g, 85%).

White solid. <sup>1</sup>H NMR (400 MHz, CDCl<sub>3</sub>): δ 2.44-2.24 (m, 3H), 2.11-2.00 (m, 2H), 1.85-1.70 (m, 3H), 1.65-1.41 (m, 6H), 1.38-1.15 (m, 10H), 1.03 (s, 3H), 0.94-0.84 (m, 4H), 0.75-0.69 (m, 1H). <sup>13</sup>C{<sup>1</sup>H} NMR (100 MHz, CDCl<sub>3</sub>): δ 212.1, 81.7, 53.9, 50.6, 46.9, 45.6, 44.8, 39.0, 38.7, 38.2, 36.4, 35.9, 31.7, 31.5, 29.0, 25.9, 23.4, 21.2, 14.1, 11.6. FTMS (ESI) m/z C<sub>20</sub>H<sub>33</sub>O<sub>2</sub> (M+H<sup>+</sup>): calc 305.2472, observed 305.2476.

(8*R*,9*S*,10*R*,13*S*,14*S*,17*R*)-17-acetyl-17-hydroxy-10,13-dimethyl-1,2,6,7,8,9,10,11,12,13,14,15,16,17-tetradecahydro-3*H*-cyclopenta[*a*]phenanthren-3-one

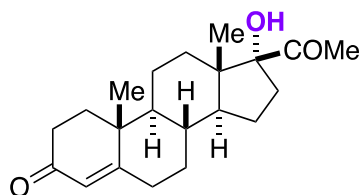

Obtained from Sigma-Aldrich.

Spectral data matches what is reported in literature.<sup>8</sup>

(1*R*,2*S*,5*R*)-2-isopropyl-5-methylcyclohexan-1-ol

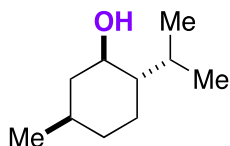

Obtained from Sigma-Aldrich.

Spectral data matches what is reported in literature.<sup>9</sup>

(1*S*,2*S*,5*R*)-2-isopropyl-1,5-dimethylcyclohexan-1-ol<sup>6</sup>

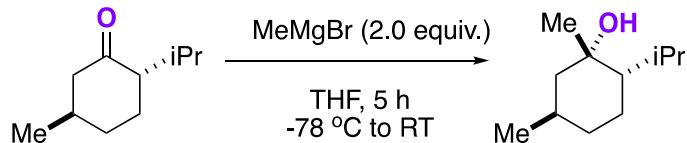

To a flame-dried three-neck round-bottom equipped with a stir bar under N<sub>2</sub> were added menthone (2.00 g, 13.0 mmol) and THF (30.0 mL). The reaction mixture was cooled to -78 °C and 1M methylmagnesium bromide in Et<sub>2</sub>O (26.0 mL, 26.0 mmol) was added. The reaction mixture was slowly warmed to RT over 5 h. The reaction mixture was quenched with 1M HCl and extracted into CH<sub>2</sub>Cl<sub>2</sub> repeatedly. The combined organic layers were dried with MgSO<sub>4</sub>, filtered through Celite, and concentrated. The crude residue was purified via gradient column chromatography to provide (1*S*,2*S*,5*R*)-2-isopropyl-1,5-dimethylcyclohexan-1-ol (1.61 g, 73%).

Spectral data matches what is reported in literature.<sup>10</sup>

(1*R*,3*aR*,5*S*,6*R*,7*aS*)-6-acetyl-7*a*-hydroxy-1-isopropyl-3*a*-methyloctahydro-1*H*-inden-5-yl acetate<sup>11, 12</sup>

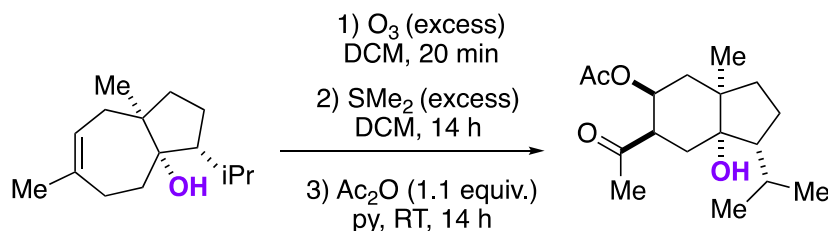

To a flame-dried three-neck round-bottom flask equipped with a stir bar were added caratol (3.00 g, 13.5 mmol) and DCM (25.0 mL). The solution was then cooled to -78 °C, purged with oxygen for 5 minutes, and then a stream of ozone gas was bubbled through the solution for 10 minutes (excess ozone was quenched by bubbling through a saturated aqueous NaSO<sub>3</sub>). Subsequently, the solution was purged with oxygen for 5 minutes, warmed to RT under N<sub>2</sub>, and concentrated. Excess dimethyl sulfide (3.0 mL) was added to the flask and stirred for 14 h. The crude mixture was concentrated and purified via column chromatography on silica gel eluting with EtOAc and hexanes to afford 1-((3*R*,3*aS*,5*R*,6*S*,7*aR*)-3*a*,6-dihydroxy-3-isopropyl-7*a*-methyloctahydro-1*H*-inden-5-yl)ethan-1-one (2.50 g, 73%).

To a flame-dried three-neck round-bottom flask equipped with a stir bar under N<sub>2</sub> were added 1-((3*R*,3*aS*,5*R*,6*S*,7*aR*)-3*a*,6-dihydroxy-3-isopropyl-7*a*-methyloctahydro-1*H*-inden-5-yl)ethan-1-one (2.50 g, 9.84 mmol), acetic anhydride (10.0 mL), and pyridine (10.0 mL). The reaction mixture was stirred for 21 h and then diluted with CH<sub>2</sub>Cl<sub>2</sub> (20 mL). The organic layer was washed with 1M HCl, saturated aq. NaHCO<sub>3</sub>, and H<sub>2</sub>O. The organic layer was dried over MgSO<sub>4</sub>, filtered through Celite, and concentrated. The crude residue was purified via gradient column chromatography on silica gel eluting with EtOAc and hexanes to provide (1*R*,3*aR*,5*S*,6*R*,7*aS*)-6-acetyl-7*a*-hydroxy-1-isopropyl-3*a*-methyloctahydro-1*H*-inden-5-yl acetate (2.68 g, 92%) as a white solid.

White solid.  $^1\text{H}$  NMR (400 MHz,  $\text{CDCl}_3$ ):  $\delta$  5.17-5.11 (m, 1H), 2.89-2.82 (m, 1H), 2.20-2.15 (m, 4H), 2.05-1.86 (m, 5H), 1.81-1.72 (m, 2H), 1.67-1.44 (m, 5H), 1.43-1.34 (m, 1H), 1.10-1.07 (m, 6H), 0.96 (d,  $J = 6.6$  Hz, 3H).  $^{13}\text{C}\{^1\text{H}\}$  NMR (100 MHz,  $\text{CDCl}_3$ ):  $\delta$  208.4, 170.1, 81.8, 70.6, 53.0, 49.2, 47.8, 40.5, 36.9, 33.7, 29.8, 29.1, 25.7, 23.2, 22.7, 21.2, 19.7. FTMS (ESI)  $m/z$   $\text{C}_{17}\text{H}_{28}\text{O}_4$ : calc 296.1988, observed 296.1985.

(1R,3aR,5S,6R,7aS)-6-acetyl-7a-hydroxy-1-isopropyl-3a-methyloctahydro-1H-inden-5-yl 4-methylbenzenesulfonate<sup>12, 13</sup>

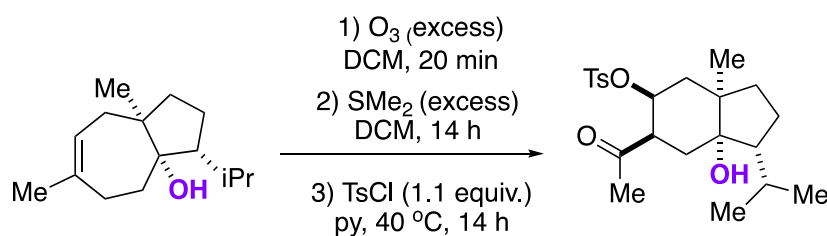

To a flame-dried three-neck round-bottom flask equipped with a stir bar were added carotol (3.00 g, 13.5 mmol) and DCM (25.0 mL). The solution was then cooled to  $-78$  °C, purged with oxygen for 5 minutes, and then a stream of ozone gas was bubbled through the solution for 10 minutes (excess ozone was quenched by bubbling through a saturated aqueous  $\text{NaSO}_3$ ). Subsequently, the solution was purged with oxygen for 5 minutes, warmed to RT under  $\text{N}_2$ , and concentrated. Excess dimethyl sulfide (3.0 mL) was added to the flask and stirred for 14 h. The crude mixture was concentrated and purified via column chromatography on silica gel eluting with EtOAc and hexanes to afford 1-((3R,3aS,5R,6S,7aR)-3a,6-dihydroxy-3-isopropyl-7a-methyloctahydro-1H-inden-5-yl)ethan-1-one (2.50 g, 73%).

To a flame-dried three-neck round-bottom flask equipped with a stir bar under  $\text{N}_2$  were added 1-((3R,3aS,5R,6S,7aR)-3a,6-dihydroxy-3-isopropyl-7a-methyloctahydro-1H-inden-5-yl)ethan-1-one (2.50 g, 9.84 mmol), tosyl chloride (2.10 g, 11.0 mmol), and pyridine (10.0 mL). The reaction mixture was stirred for 21 h at 40 °C and then diluted with  $\text{CH}_2\text{Cl}_2$  (20.0 mL). The organic layer was washed with 1M HCl, saturated aq.  $\text{NaHCO}_3$ , and  $\text{H}_2\text{O}$ . The organic layer was dried over  $\text{MgSO}_4$ , filtered through Celite, and concentrated. The crude residue was purified via gradient column chromatography on silica gel eluting with EtOAc and hexanes to provide (1R,3aR,5S,6R,7aS)-6-acetyl-7a-hydroxy-1-isopropyl-3a-methyloctahydro-1H-inden-5-yl 4-methylbenzenesulfonate (3.73 g, 93%) as a white solid.

White solid.  $^1\text{H}$  NMR (400 MHz,  $\text{CDCl}_3$ ):  $\delta$  7.69 (d,  $J = 8.3$  Hz, 2H), 7.30 (d,  $J = 8.0$  Hz, 2H), 4.82-4.75 (m, 1H), 2.88 (ddt,  $J = 20.1, 13.6, 6.8$  Hz, 1H), 2.41 (s, 3H), 2.07-2.02 (m, 1H), 2.00 (s, 3H), 1.93-1.80 (m, 4H), 1.73-1.41 (m, 6H), 1.36-1.30 (m, 2H), 1.00-0.98 (m, 6H), 0.90 (m, 3H).  $^{13}\text{C}\{^1\text{H}\}$  NMR (100 MHz,  $\text{CDCl}_3$ ):  $\delta$  207.3, 144.8, 133.8, 129.7, 127.8, 81.1, 79.3, 53.5, 52.6, 49.1, 47.9, 41.5, 36.7, 33.6, 29.8, 29.6, 25.6, 23.0, 22.5, 21.7, 19.4. FTMS (ESI)  $m/z$   $\text{C}_{21}\text{H}_{32}\text{O}_5\text{S}$  ( $\text{M}+\text{H}^+$ ): calc 409.2040, observed 409.2046.

2-((1*R*,2*R*,4*aS*,8*aS*)-2-hydroxy-2,5,5,8*a*-tetramethyldecahydronaphthalen-1-yl)ethyl acetate

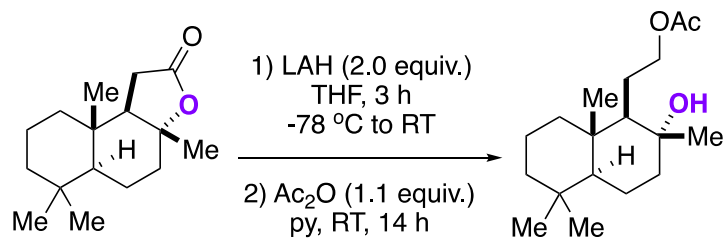

To a flame-dried three-neck round-bottom equipped with a stir bar under N<sub>2</sub> were added (3*aR*,5*aS*,9*aS*,9*bR*)-3*a*,6,6,9*a*-tetramethyldecahydrophtho[2,1-*b*]furan-2(1*H*)-one (3.00 g, 12.0 mmol) and THF (30.0 mL). The reaction mixture was cooled to -78 °C and 1M LAH in THF (24.0 mL, 24.0 mmol) was added dropwise. The reaction mixture was slowly warmed to RT over 3 h. The reaction mixture was quenched with 1M HCl and extracted into CH<sub>2</sub>Cl<sub>2</sub> repeatedly. The combined organic layers were dried with MgSO<sub>4</sub>, filtered through Celite, and concentrated. The crude residue was purified via gradient column chromatography to provide (1*R*,2*R*,4*aS*,8*aS*)-1-(2-hydroxyethyl)-2,5,5,8*a*-tetramethyldecahydronaphthalen-2-ol (2.80 g, 92%).

To a flame-dried three-neck round-bottom flask equipped with a stir bar under N<sub>2</sub> were added (1*R*,2*R*,4*aS*,8*aS*)-1-(2-hydroxyethyl)-2,5,5,8*a*-tetramethyldecahydronaphthalen-2-ol (2.80 g, 11.0 mmol), acetic anhydride (10.0 mL), and pyridine (10.0 mL). The reaction mixture was stirred for 14 h and then diluted with CH<sub>2</sub>Cl<sub>2</sub> (20.0 mL). The organic layer was washed with 1M HCl, saturated aq. NaHCO<sub>3</sub>, and H<sub>2</sub>O. The organic layer was dried over MgSO<sub>4</sub>, filtered through Celite, and concentrated. The crude residue was purified via gradient column chromatography on silica gel eluting with EtOAc and hexanes to provide 2-((1*R*,2*R*,4*aS*,8*aS*)-2-hydroxy-2,5,5,8*a*-tetramethyldecahydronaphthalen-1-yl)ethyl acetate (3.10 g, 95%).

White solid. <sup>1</sup>H NMR (400 MHz, CDCl<sub>3</sub>) δ 4.16-4.05 (m, 2H), 2.04 (s, 3H), 1.88 (dt, *J* = 12.2, 3.1 Hz, 1H), 1.78-1.52 (m, 6H), 1.46-1.34 (m, 3H), 1.31-1.20 (m, 1H), 1.17-1.07 (m, 5H), 0.93-0.86 (m, 5H), 0.78 (s, 6H). <sup>13</sup>C{<sup>1</sup>H} NMR (100 MHz, CDCl<sub>3</sub>): δ 171.2, 73.6, 66.7, 58.1, 56.1, 44.4, 42.0, 39.7, 38.8, 33.5, 33.3, 24.6, 24.0, 21.5, 21.2, 20.5, 18.5, 15.4. FTMS (ESI) *m/z* C<sub>18</sub>H<sub>32</sub>O<sub>3</sub>: calc 296.2351, observed 279.2319 (corresponds to loss of -OH).

2-((1*R*,2*S*)-2-hydroxy-2,6,6-trimethylcyclohexyl)ethyl acetate<sup>13, 14</sup>

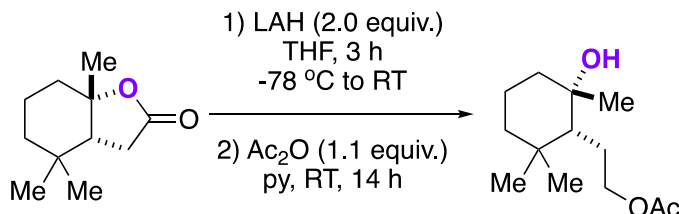

To a flame-dried three-neck round-bottom equipped with a stir bar under N<sub>2</sub> were added (3*aR*,7*aS*)-4,4,7*a*-trimethylhexahydrobenzofuran-2(3*H*)-one (2.50 g, 13.7 mmol) and THF (30.0 mL). The reaction mixture was cooled to -78 °C and 1M LAH in THF (27.5 mL, 27.5 mmol) was added



dropwise. The reaction mixture was slowly warmed to RT over 3 h. The reaction mixture was quenched with 1M HCl and extracted into CH<sub>2</sub>Cl<sub>2</sub> repeatedly. The combined organic layers were dried with MgSO<sub>4</sub>, filtered through Celite, and concentrated. The crude residue was purified via gradient column chromatography to provide (1*S*,2*R*)-2-(2-hydroxyethyl)-1,3,3-trimethylcyclohexan-1-ol (2.48 g, 97%).

To a flame-dried three-neck round-bottom flask equipped with a stir bar under N<sub>2</sub> were added (1*S*,2*R*)-2-(2-hydroxyethyl)-1,3,3-trimethylcyclohexan-1-ol (2.48 g, 13.3 mmol), acetic anhydride (10.0 mL), and pyridine (10.0 mL). The reaction mixture was stirred for 14 h and then diluted with CH<sub>2</sub>Cl<sub>2</sub> (20 mL). The organic layer was washed with 1M HCl, saturated aq. NaHCO<sub>3</sub>, and H<sub>2</sub>O. The organic layer was dried over MgSO<sub>4</sub>, filtered through Celite, and concentrated. The crude residue was purified via gradient column chromatography on silica gel eluting with EtOAc and hexanes to provide 2-((1*R*,2*S*)-2-hydroxy-2,6,6-trimethylcyclohexyl)ethyl acetate (2.74 g, 90%).

Clear oil. <sup>1</sup>H NMR (400 MHz, CDCl<sub>3</sub>): δ 4.07 (dm, *J* = 17.9, 2H), 2.05 (s, 3H), 1.89-1.62 (m, 4H), 1.47-1.35 (m, 3H), 1.21-1.13 (m, 4H), 0.97 (s, 4H), 0.90-0.88 (m, 4H). <sup>13</sup>C {<sup>1</sup>H} NMR (100 MHz, CDCl<sub>3</sub>): δ 170.9, 72.1, 66.1, 49.9, 41.6, 41.0, 34.2, 31.8, 30.6, 24.6, 21.2, 20.8, 18.0. FTMS (ESI) *m/z* C<sub>13</sub>H<sub>24</sub>O<sub>3</sub>: calc 228.1725, observed 211.1694 (corresponds to loss of -OH).

#### 1-(4-chlorophenyl)cycloheptane-1-ol

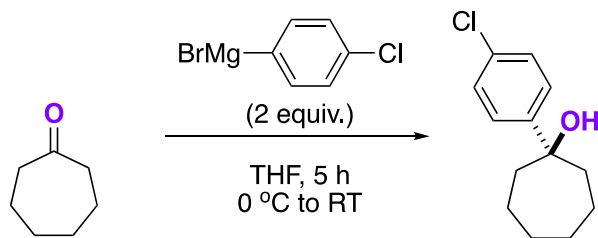

To a flame-dried three-neck round-bottom equipped with a stir bar under N<sub>2</sub> were added a suspension of cycloheptanone (2.00 g, 17.9 mmol) in THF (30.0 mL). The reaction mixture was cooled to 0 °C and 1M 4-chlorophenylmagnesium bromide in Et<sub>2</sub>O (35.0 mL, 35.0 mmol) was added. The reaction mixture was slowly warmed to RT over 5 h. The reaction mixture was quenched with 1M HCl and extracted into CH<sub>2</sub>Cl<sub>2</sub> repeatedly. The combined organic layers were dried with MgSO<sub>4</sub>, filtered through Celite, and concentrated. The crude residue was purified via gradient column chromatography to provide 1-(4-chlorophenyl)cycloheptane-1-ol (2.10 g, 53%).

Spectral data matches what is reported in literature.<sup>15</sup>

### 1-(4-chlorophenyl)cyclopentane-1-ol

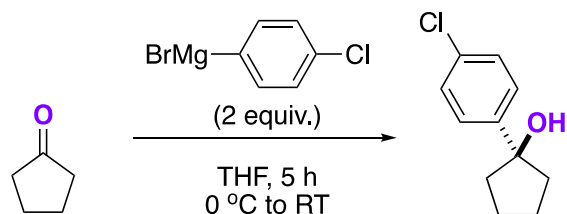

To a flame-dried three-neck round-bottom equipped with a stir bar under N<sub>2</sub> were added a suspension of cyclopentanone (2.00 g, 23.8 mmol) in THF (30.0 mL). The reaction mixture was cooled to 0 °C and 1M 4-chlorophenylmagnesium bromide in Et<sub>2</sub>O (45.0 mL, 45.0 mmol) was added. The reaction mixture was slowly warmed to RT over 5 h. The reaction mixture was quenched with 1M HCl and extracted into CH<sub>2</sub>Cl<sub>2</sub> repeatedly. The combined organic layers were dried with MgSO<sub>4</sub>, filtered through Celite, and concentrated. The crude residue was purified via gradient column chromatography to provide 1-(4-chlorophenyl)cyclopentane-1-ol (1.90 g, 41%).

Spectral data matches what is reported in literature.<sup>16</sup>

### (S)- and (R)-1-methyl-1,2,3,4-tetrahydronaphthalen-1-ol

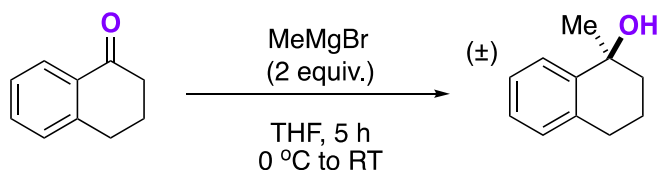

To a flame-dried three-neck round-bottom equipped with a stir bar under N<sub>2</sub> were added a suspension of 1-tetralone (2.00 g, 13.7 mmol) in THF (30.0 mL). The reaction mixture was cooled to 0 °C and 3M methylmagnesium bromide in Et<sub>2</sub>O (10.0 mL, 30.0 mmol) was added. The reaction mixture was slowly warmed to RT over 5 h. The reaction mixture was quenched with 1M HCl and extracted into CH<sub>2</sub>Cl<sub>2</sub> repeatedly. The combined organic layers were dried with MgSO<sub>4</sub>, filtered through Celite, and concentrated. The crude residue was purified via gradient column chromatography to provide 1-methyl-1,2,3,4-tetrahydronaphthalen-1-ol (1.55 g, 70%).

Spectral data matches what is reported in literature.<sup>16</sup>

### (S)- and (R)-1-phenyl-2,3-dihydro-1H-inden-1-ol

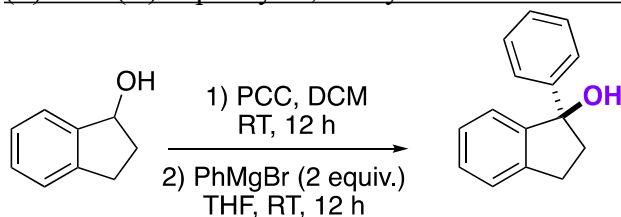

To a flame-dried three-neck round-bottom equipped with a stir bar under N<sub>2</sub> were added indanol (1.20 g, 9.01 mmol), DCM (25.0 mL), and PCC (2.90 g, 13.5 mmol). The reaction mixture was stirred at RT for 14 h. The reaction mixture was then filtered through Celite and concentrated.

To a flame-dried three-neck round-bottom equipped with a stir bar under N<sub>2</sub> were added crude mixture from the previous reaction (1.98 g, 9.01 mmol) and THF (30.0 mL). The reaction mixture was cooled to 0 °C and 1M phenylmagnesium bromide in Et<sub>2</sub>O (18.0 mL, 18.0 mmol) was added. The reaction mixture was slowly warmed to RT over 5 h. The reaction mixture was quenched with 1M HCl and extracted into CH<sub>2</sub>Cl<sub>2</sub> repeatedly. The combined organic layers were dried with MgSO<sub>4</sub>, filtered through Celite, and concentrated. The crude residue was purified via gradient column chromatography to provide (S)- and (R)-1-phenyl-2,3-dihydro-1H-inden-1-ol.

Spectral data matches what is reported in literature<sup>17</sup>

### Fenchyl alcohol

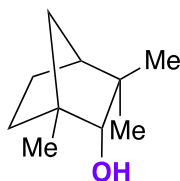

Obtained from Sigma-Aldrich.

Spectral data matches what is reported in literature.<sup>18</sup>

### 9-(4-chlorophenyl)bicyclo[3.3.1]nonan-9-ol

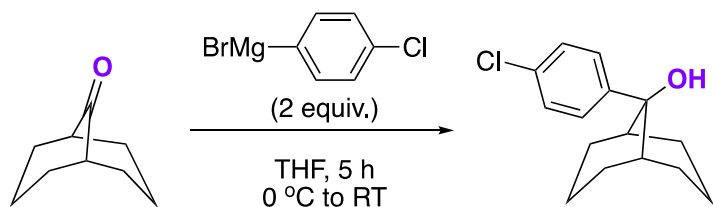

To a flame-dried three-neck round-bottom equipped with a stir bar under N<sub>2</sub> were added a suspension of bicyclo[3.3.1]nonan-9-one (1.00 g, 7.25 mmol) in THF (20.0 mL). The reaction mixture was cooled to 0 °C and 1M 4-chlorophenylmagnesium bromide in Et<sub>2</sub>O (15.0 mL, 15.0 mmol) was added. The reaction mixture was slowly warmed to RT over 5 h. The reaction mixture was quenched with 1M HCl and extracted into CH<sub>2</sub>Cl<sub>2</sub> repeatedly. The combined organic layers were dried with MgSO<sub>4</sub>, filtered through Celite, and concentrated. The crude residue was purified via gradient column chromatography to provide 9-(4-chlorophenyl)bicyclo[3.3.1]nonan-9-ol (1.20 g, 66%).

Clear Oil. <sup>1</sup>H NMR (400 MHz, CDCl<sub>3</sub>): δ 7.51 (d, J = 8.70 Hz, 2H) 2.51 (s, 1H), 2.44-2.34 (m, 2H), 2.12-2.07 (m, 2H), 1.99-1.63 (m, 9H), 1.38-1.33 (m, 1H); <sup>13</sup>C {<sup>1</sup>H} NMR (100 MHz, CDCl<sub>3</sub>):

$\delta$  143.55, 133.00, 128.85, 127.17, 74.02, 35.43, 29.64, 27.18, 20.98, 20.55. FTMS (ESI) m/z  
 $C_{15}H_{19}O$ : calc 250.1124, observed 233.1086 (corresponds to loss of -OH).

## Product Characterization Data

### (1S,3R)- and (1R,3S)-1-(4-chlorophenyl)-3-fluoro-3-methylcyclohexan-1-ol (compound 6)

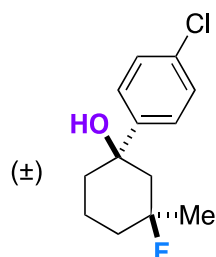

The reaction was run according to the general procedure, and the major diastereomer was isolated. The crude material was subjected to gradient column chromatography on silica gel eluting with hexanes and EtOAc, followed by HPLC purification.

Regiochemical and stereochemical assignments were made on the basis of 1) chemical shift of the  $^{19}\text{F}$  NMR signal, indicative of a tertiary fluoride on a cyclohexane ring, 2) disappearance of the diagnostic tertiary proton signal (1.88 ppm) in the  $^1\text{H}$  NMR spectrum, 3) diagnostic methyl  $^1\text{H}$  signal shift (1.40 ppm) and coupling constant ( $J = 22.10$  Hz), 4) -OH  $^1\text{H}$  signal has a chemical shift (3.62 ppm) and coupling ( $J = 19.1$  Hz) indicative of intramolecular hydrogen bonding, 5) absence of a downfield  $^1\text{H}$  signal with approximately  $^2J_{\text{HF}} = 50$  Hz coupling suggest no secondary or primary fluorides present, 6) chemical shift and splitting in the  $^{19}\text{F}$  NMR spectrum that indicates  $F_{\text{ax}}$  (for example: the  $F_{\text{ax}}$  and  $F_{\text{eq}}$  diastereomers of 1-fluoro-1-methyl-4-*t*-butylcyclohexane have a chemical shift of -154 ppm and -127 ppm, respectively), and 7) identification of distinguishable peaks (quaternary, C-F, etc.) in the  $^{13}\text{C}$  NMR spectrum are in agreement with the regioisomer assignment ( $^2J_{\text{CF}}$ - and  $^3J_{\text{CF}}$ -coupling and chemical shifts).

$^1\text{H}$  NMR (400 MHz,  $\text{CDCl}_3$ ): 7.45 (m, 2H), 7.31 (m, 2H), 3.62 (d,  $J = 19.1$  Hz, 1H), 2.16-2.01 (m, 3H), 1.90-1.69 (m, 4H), 1.40 (m, 4H).  $^{13}\text{C}\{^1\text{H}\}$  NMR (100 MHz,  $\text{CDCl}_3$ ):  $\delta$  146.6, 132.6, 128.4, 126.3, 97.9 (d,  $J = 141.9$  Hz), 73.2, 48.0, 47.8, 37.8, 35.9, 35.7, 28.5, 28.3, 17.5.  $^{19}\text{F}$  NMR (282 MHz,  $\text{CDCl}_3$ ):  $\delta$  -145.5 - (-146.0) (m). FTMS (ESI)  $m/z$   $\text{C}_{13}\text{H}_{16}\text{OCIF}$ : calc 242.0874, observed 242.0861.

### (2R,5S)-3-fluoro-4,4,8-trimethyltricyclo[6.3.1.0<sup>2,5</sup>]dodecan-1-ol (compound 7)

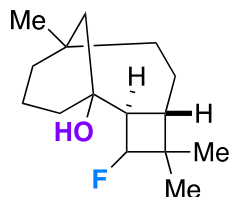

The reaction was run according to the general procedure, and the major diastereomer was isolated. The crude material was subjected to gradient column chromatography on silica gel eluting with hexanes and EtOAc, followed by HPLC purification.

Regiochemical assignment was made on the basis of 1) chemical shift of the  $^{19}\text{F}$  NMR signal, indicative of a secondary fluoride on a cyclobutane ring, 2)  $^1\text{H}$  signals of the adjacent dimethyl group are separate (in comparison to the starting material) and shifted downfield (1.04 ppm), 3) the chemical shift and coupling constant ( $^2J_{\text{HF}} = 50.1$  Hz) of the  $^1\text{H}$  signal at 4.38 ppm are indicative of a proton with a geminal fluoride, 4)  $^{13}\text{C}$  signal of the carbon attached to fluorine has a  $^1J_{\text{CF}} = 225.6$  Hz, which is characteristic of a fluorocyclobutane (for example: the  $^1J_{\text{CF}}$  of fluorocyclohexane, fluorocyclopentane, and fluorocyclobutane are 170, 174, and 215 Hz, respectively), and 5) -OH  $^1\text{H}$  signal (taken in dry  $\text{CHCl}_3$ ) at 1.88 ppm is shifted downfield relative to the starting material (indicative of hydrogen bonding), and 6) identification of distinguishable peaks (quaternary, C-F, etc.) in the  $^{13}\text{C}$  NMR spectrum are in agreement with the regioisomer assignment ( $^2J_{\text{CF}}$ - and  $^3J_{\text{CF}}$ -coupling and chemical shifts).

$^1\text{H}$  NMR (400 MHz,  $\text{CDCl}_3$ ):  $\delta$  4.38 (dm,  $J = 50.1$  Hz, 1H), 2.17-1.87 (m, 4H), 1.73-1.46 (m, 6H), 1.38-1.14 (m, 5H), 1.02 (s, 3H), 0.98 (s, 3H), 0.92 (s, 3H).  $^{13}\text{C}\{^1\text{H}\}$  NMR (100 MHz,  $\text{CDCl}_3$ ):  $\delta$  93.70 (dd,  $J = 225.6, 3.77$  Hz), 72.0, 71.8, 44.9, 43.19, 43.18, 43.16, 38.22, 38.18, 36.8, 35.32, 35.30, 34.63, 34.55, 34.4, 33.08, 33.06, 32.4, 30.5, 26.4, 26.3, 26.2, 26.1, 21.98, 21.95, 20.8.  $^{19}\text{F}$  NMR (282 MHz,  $\text{CDCl}_3$ ):  $\delta$  -190.4 - (-190.8) (m). FTMS (ESI)  $m/z$   $\text{C}_{15}\text{H}_{25}\text{OF}$ : calc 240.1889, observed 240.1882.

(3*aR*,4*R*,8*S*,8*aR*,9*S*)-1-fluoro-2,2,4,8,9-pentamethyldecahydro-4,8-methanoazulen-9-ol  
(compound **8**)

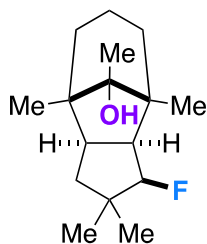

The reaction was run according to the general procedure, and the major diastereomer was isolated. The crude material was subjected to gradient column chromatography on silica gel eluting with hexanes and EtOAc, followed by HPLC purification.

Regiochemical and stereochemical assignments were made on the basis of 1) chemical shift of the  $^{19}\text{F}$  NMR signal, indicative of a secondary fluoride on a cyclopentane ring, and coupling (doublet of doublets) agree with the proposed regioisomer, 2) -OH  $^1\text{H}$  signal (taken in dry  $\text{CHCl}_3$ ) at 3.43 ppm is shifted downfield relative to the starting material (indicative of hydrogen bonding), 3) diagnostic tertiary  $^1\text{H}$  signal (alpha to the designated fluorine) signal (2.58 ppm) is shifted downfield, 4) one of the diagnostic dimethyl  $^1\text{H}$  signal shift (1.07 ppm) and coupling constant ( $J = 1.47$  Hz), 5) the absence of a strong interaction within the  $^1\text{H}$ - $^1\text{H}$  NOESY and  $^{19}\text{F}$ - $^1\text{H}$  HOESY spectrum between the fluorine/geminal proton to fluorine and methyl at the alcohol bridgehead, suggesting the assigned regio- and stereoisomer, and 6) identification of distinguishable peaks (quaternary, C-F, etc.) in the  $^{13}\text{C}$  NMR spectrum are in agreement with the regioisomer assignment ( $^2J_{\text{CF}}$ - and  $^3J_{\text{CF}}$ -coupling and chemical shifts).

$^1\text{H}$  NMR (400 MHz,  $\text{CDCl}_3$ ):  $\delta$  4.40 (dm,  $J = 50.4$  Hz, 1H), 2.65-2.56 (m, 1H), 2.29-2.20 (m, 1H), 1.95-1.87 (m, 1H), 1.82-1.58 (m, 3H) 1.42-1.28 (m, 4H), 1.06-1.05 (m, 6H) 0.97-0.93 (m, 10H)  $^{13}\text{C}\{^1\text{H}\}$  NMR (100 MHz,  $\text{CDCl}_3$ ):  $\delta$  96.5 (d,  $J = 176.7$  Hz), 84.9 (d,  $J = 8.2$  Hz), 51.3, 51.2, 51.1, 45.17, 45.16, 43.9, 43.5, 40.6, 35.3, 35.2, 29.3, 26.8, 25.3, 25.1, 18.2, 16.3, 12.23, 12.18.  $^{19}\text{F}$  NMR (282 MHz,  $\text{CDCl}_3$ ):  $\delta$  -181.2 (dd,  $J = 50.4, 20.9$  Hz). FTMS (ESI)  $m/z$   $\text{C}_{16}\text{H}_{27}\text{OF}$ : calc 254.2046, observed 235.2056 (corresponds to loss of fluorine).

(3*a*S,4*R*,8*S*,8*a*R,9*R*)-5-fluoro-2,2,4,8-tetramethyldecahydro-4,8-methanoazulen-9-ol (compound **9**)

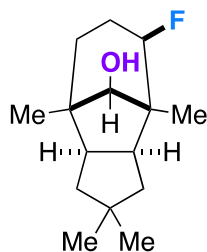

The reaction was run according to the general procedure (with the exception: 1.2 equiv. of Selectfluor used), and the major diastereomer was isolated. The crude material was subjected to gradient column chromatography on silica gel eluting with hexanes and EtOAc, followed by HPLC purification.

Stereochemical and regiochemical assignment reasoning discussed within manuscript.

$^1\text{H}$  NMR (400 MHz,  $\text{CDCl}_3$ ):  $\delta$  4.64 (dm,  $J = 50.3$  Hz, 1H), 3.44-3.41 (t,  $J = 4.5$  Hz, 1H), 2.48 (dd,  $J = 19.54, 9.94$  Hz, 1H), 2.23-2.16 (m, 1H), 1.94-1.88 (m, 1H), 1.74-1.59 (m, 2H), 1.45-1.38 (m, 2H), 1.34 (d,  $J = 4.3$  Hz, 1H), 1.20-1.11 (m, 1H), 1.07, 1.03 (m, 7H), 0.92-0.87 (m, 7H).  $^{13}\text{C}\{^1\text{H}\}$  NMR (100 MHz,  $\text{CDCl}_3$ ):  $\delta$  95.80, 95.77, 94.08, 94.05, 81.14, 81.11, 81.06, 81.03, 47.2, 46.5, 46.4, 44.1, 43.7, 41.31, 41.30, 40.8, 39.6, 30.8, 30.7, 29.0, 25.7, 25.5, 25.4, 19.84, 19.81, 16.7, 16.6.  $^{19}\text{F}$  NMR (282 MHz,  $\text{CDCl}_3$ ):  $\delta$  -194.2 - (-195.2) (m). FTMS (ESI)  $m/z$   $\text{C}_{15}\text{H}_{25}\text{OF}$ : calc 240.1889, observed 240.1901.

(5*S*,8*R*,9*S*,10*S*,12*R*,13*S*,14*S*,17*S*)-12-fluoro-17-hydroxy-10,13,17-trimethylhexadecahydro-3*H*-cyclopenta[*a*]phenanthren-3-one (compound **10**)

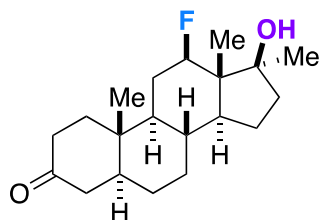

The reaction was run according to the general procedure, and the major diastereomer was isolated. The crude material was subjected to gradient column chromatography on silica gel eluting with hexanes and EtOAc, followed by HPLC purification.

Regiochemical and stereochemical assignments were made on the basis of 1) chemical shift of the  $^{19}\text{F}$  NMR signal, indicative of a secondary fluoride on a cyclohexane ring, 2) the C18 methyl  $^1\text{H}$  signal (0.88  $\rightarrow$  0.99 ppm) is shifted downfield relative to the starting material, 3) the chemical shift and coupling constant (doublet of doublet of doublets,  $J = 50.2, 11.2, 5.0$  Hz) of the  $^1\text{H}$  signal at 4.63 ppm are indicative of a proton with a geminal fluoride and corroborates the designated regioisomer's chemical environment, 4) strong interaction within the  $^1\text{H}$ - $^1\text{H}$  NOESY spectrum between the geminal proton to the fluoride and methyl upon the C17 carbon supports evidence for the beta-fluoro configuration, 5) the absence of a strong interaction within the  $^{19}\text{F}$ - $^1\text{H}$  NOESY spectrum between the fluorine and methyl upon the C17 carbon infer the beta-fluoro configuration, and 6)  $^{13}\text{C}$  signal associated with F-C;  $^1J_{\text{CF}} = 179.2$  Hz is indicative of a secondary fluoride on a cyclohexane ring.

$^1\text{H}$  NMR (400 MHz,  $\text{CDCl}_3$ ):  $\delta$  4.63 (ddd,  $J = 50.2, 11.2, 5.0$  Hz, 1H), 2.47-2.22 (m, 3H), 2.14-1.87 (m, 4H), 1.77-1.13 (m, 13H), 1.06 (s, 3H), 0.99 (s, 3H), 0.91-0.77 (s, 4H).  $^{13}\text{C}\{^1\text{H}\}$  NMR (100 MHz,  $\text{CDCl}_3$ ):  $\delta$  211.4, 95.4 (d,  $J = 179.2$  Hz), 81.6, 52.1, 52.0, 50.3, 50.1, 49.3, 49.2, 46.6, 44.6, 38.6, 38.1, 35.9, 35.3, 30.9, 28.8, 27.9, 27.7, 26.3, 23.3, 11.6, 9.1.  $^{19}\text{F}$  NMR (282 MHz,  $\text{CDCl}_3$ ):  $\delta$  -183.5 (d,  $J = 50.3$  Hz). FTMS (ESI)  $m/z$   $\text{C}_{20}\text{H}_{32}\text{O}_2\text{F}$  ( $\text{M}+\text{H}^+$ ): calc 323.2378, observed 323.2381.

(8R,9S,10R,12S,13S,14S,17R)-17-acetyl-12-fluoro-17-hydroxy-10,13-dimethyl-1,2,6,7,8,9,10,11,12,13,14,15,16,17-tetradecahydro-3H-cyclopenta[a]phenanthren-3-one  
(compound **11**)

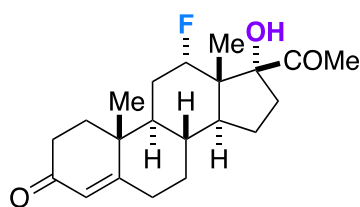

The reaction was run according to the general procedure (with the exception: 0.0 equiv. of  $\text{NaHCO}_3$  used), and the major diastereomer was isolated. The crude material was subjected to gradient column chromatography on silica gel eluting with hexanes and EtOAc, followed by HPLC purification.

Regiochemical and stereochemical assignments were made on the basis of 1) chemical shift of the  $^{19}\text{F}$  NMR signal, indicative of a secondary fluoride on a cyclohexane ring, 2) -OH  $^1\text{H}$  signal (3.12 ppm) is shifted downfield relative to the starting material (indicative of hydrogen bonding, thus alpha-fluoro configuration), 3)  $^1\text{H}$  signal with the coupling constant (doublet of doublet of doublets,  $J = 49.52, 11.09, 5.16$  Hz) at 4.96 ppm are indicative of a proton with a geminal fluoride and corroborates the designated regioisomer's chemical environment, 4) the absence of a strong interaction within the  $^1\text{H}$ - $^1\text{H}$  NOESY spectrum between the geminal proton to the fluoride and -OH infers the alpha-fluoro configuration, and 5) identification of distinguishable peaks (quaternary, C-F, etc.) in the  $^{13}\text{C}$  NMR spectrum are in agreement with the regioisomer assignment ( $^2J_{\text{CF}}$ - and  $^3J_{\text{CF}}$ -coupling and chemical shifts).



$^1\text{H}$  NMR (400 MHz,  $\text{CDCl}_3$ ):  $\delta$  5.75 (s, 1H), 4.96 (ddd,  $J = 49.52, 11.09, 5.16$  Hz, 1H), 3.12 (s, 1H), 2.77-2.66 (m, 1H), 2.48-2.28 (m, 7H), 2.05-1.85 (m, 4H), 1.76-1.67 (m, 2H), 1.61 (s, 3H), 1.59-1.48 (m, 3H), 1.21 (s, 3H), 1.12-1.01 (m, 2H), 0.88 (s, 3H).  $^{13}\text{C}\{^1\text{H}\}$  NMR (100 MHz,  $\text{CDCl}_3$ ):  $\delta$  211.87, 199.37, 169.97, 169.96, 124.29, 92.04, 90.27, 89.00, 88.99, 53.21, 53.04, 51.65, 51.56, 48.74, 48.68, 38.40, 38.39, 35.64, 35.20, 34.28, 34.27, 33.80, 32.62, 31.24, 31.22, 27.17, 26.98, 26.87, 26.82, 23.49, 23.47, 17.23, 9.79, 9.75;  $^{19}\text{F}$  NMR (282 MHz,  $\text{CDCl}_3$ ):  $\delta$  -176.37 – (-176.55) (m). FTMS (ESI)  $m/z$   $\text{C}_{13}\text{H}_{23}\text{O}_3\text{F}$  ( $\text{M}+\text{H}^+$ ): calc 349.2179, observed 349.2163.

(1*R*,2*R*,5*R*)-2-(2-fluoropropan-2-yl)-5-methylcyclohexan-1-ol (compound 12)

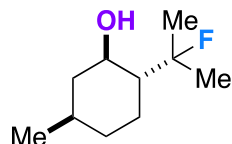

The reaction was run according to the general procedure (with the exception: 1.2 equiv. of Selectfluor used), and the major diastereomer was isolated. The crude material was subjected to gradient column chromatography on silica gel eluting with hexanes and EtOAc, followed by HPLC purification.

Spectral data matches what is reported in literature.<sup>19</sup>

(1*S*,2*S*,5*S*)-5-fluoro-2-isopropyl-1,5-dimethylcyclohexan-1-ol (compound 13)

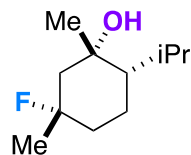

The reaction was run according to the general procedure, and the major diastereomer was isolated. The crude material was subjected to gradient column chromatography on silica gel eluting with hexanes and EtOAc, followed by HPLC purification.

Regiochemical and stereochemical assignments were made on the basis of 1) the chemical shift of the  $^{19}\text{F}$  NMR signal, highly indicative of an axial tertiary fluoride on a cyclohexane ring, 2) disappearance of the diagnostic tertiary proton signal (1.4 ppm) in the  $^1\text{H}$  NMR spectrum, 3) absence of a downfield  $^1\text{H}$  signal with approximately 50 Hz coupling suggests no secondary or primary fluorides present, 4) diagnostic isopropyl  $^1\text{H}$  signals are still present at the approximately 0.93 ppm methyl, 5) methyl  $^1\text{H}$  signal alpha to the fluoride has a drastic shift (compared to the starting material) to 1.51 ppm and coupling constant of  $J = 23.3$  Hz, and 6) identification of distinguishable peaks (quaternary, C-F, etc.) in the  $^{13}\text{C}$  NMR spectrum are in agreement with the regioisomer assignment ( $^2J_{\text{CF}}$ - and  $^3J_{\text{CF}}$ -coupling and chemical shifts).

$^1\text{H}$  NMR (400 MHz,  $\text{CDCl}_3$ ):  $\delta$  2.14-2.07 (m, 1H), 1.95-1.92 (m, 1H), 1.87 -1.73(m, 2H), 1.54-1.43 (m, 6H), 1.29 (s, 3H), 1.13 (dm,  $J = 11.2$ , 1H), 0.96 (dm,  $J = 7.0$  Hz, 3H), 0.90 (dm,  $J = 6.9$  Hz, 3H), 0.85 (s, 1H).  $^{13}\text{C}\{^1\text{H}\}$  NMR (100 MHz,  $\text{CDCl}_3$ ):  $\delta$  96.1 (d,  $J = 167.0$  Hz), 74.2 (d,  $J =$

13.1 Hz), 51.9, 51.8, 50.6, 38.3 (d,  $J = 20.4$  Hz), 30.5, 26.5, 26.3, 26.0, 24.3, 19.7 (d,  $J = 10.7$  Hz), 18.7.  $^{19}\text{F}$  NMR (282 MHz,  $\text{CDCl}_3$ ):  $\delta$  -118.8 - (-119.3) (m). FTMS (ESI)  $m/z$ : 188.1576 calc, observed 172.16 (corresponds to loss of  $-\text{OH} + \text{H}^+$ ).

(1*S*,3*aR*,5*S*,6*R*,7*aS*)-6-acetyl-1-(2-fluoropropan-2-yl)-7*a*-hydroxy-3*a*-methyloctahydro-1*H*-inden-5-yl acetate (compound 14)

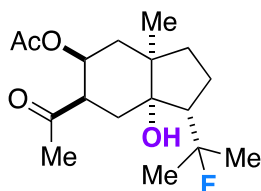

The reaction was run according to the general procedure, and the major diastereomer was isolated. The crude material was subjected to gradient column chromatography on silica gel eluting with hexanes and EtOAc, followed by HPLC purification.

Regiochemical assignment was made on the basis of 1) the chemical shift of the  $^{19}\text{F}$  NMR signal, indicative of a tertiary fluoride, 2)  $^{19}\text{F}$  signal coupling (dq,  $J = 44.0, 21.9, 11.2$  Hz) agrees with the chemical environment of the regioisomer, 3) absence of a downfield  $^1\text{H}$  signal with approximately 50 Hz coupling implies no secondary or primary fluorides are present, 4) diagnostic  $^1\text{H}$  methyl signal shift from isopropyl group (1.56 ppm) and coupling constant ( $J = 22.04$  Hz) for the isopropyl group, and 5) identification of distinguishable peaks (quaternary, C-F, etc.) in the  $^{13}\text{C}$  NMR spectrum are in agreement with the regioisomer assignment ( $^2J_{\text{CF}}$  and  $^3J_{\text{CF}}$ -coupling and chemical shifts).

$^1\text{H}$  NMR (400 MHz,  $\text{CDCl}_3$ ):  $\delta$  5.16 (td,  $J = 11.4, 4.7$  Hz, 1H), 2.84-2.77 (m, 1H), 2.56-2.45 (m, 1H), 2.30 (dd,  $J = 13.9, 3.7$  Hz, 1H), 2.17-2.12 (m, 4H), 1.97 (s, 3H), 1.95-1.80 (m, 2H), 1.72-1.63 (m, 2H), 1.58-1.50 (m, 6H), 1.45-1.37 (m, 3H), 1.11 (s, 3H).  $^{13}\text{C}\{^1\text{H}\}$  NMR (100 MHz,  $\text{CDCl}_3$ ):  $\delta$  208.2, 170.1, 99.8 (d,  $J = 164.3$  Hz), 82.0, 70.3, 53.3, 50.0, 49.8, 48.0, 40.2, 36.8, 33.93, 33.90, 28.8, 28.3, 28.1, 27.0, 26.7, 22.9, 22.8, 21.2, 19.5.  $^{19}\text{F}$  NMR (282 MHz,  $\text{CDCl}_3$ ): -142.0 (dq,  $J = 44.0, 21.9, 11.2$  Hz). FTMS (ESI)  $m/z$   $\text{C}_{17}\text{H}_{27}\text{O}_4\text{F}$  ( $\text{M}+\text{H}^+$ ): calc 315.1900, observed 315.1966.

(1*S*,3*aR*,5*S*,6*R*,7*aS*)-6-acetyl-1-(2-fluoropropan-2-yl)-7*a*-hydroxy-3*a*-methyloctahydro-1*H*-inden-5-yl 4-methylbenzenesulfonate (compound 15)

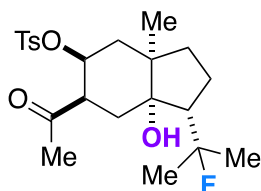

The reaction was run according to the general procedure, and the major diastereomer was isolated. The crude material was subjected to gradient column chromatography on silica gel eluting with hexanes and EtOAc, followed by HPLC purification.

Regiochemical assignment was made on the basis of 1) the chemical shift (142.5 ppm) of the  $^{19}\text{F}$  NMR signal, indicative of a tertiary fluoride, 2)  $^{19}\text{F}$  signal coupling (dq,  $J = 55.7, 33.7, 11.4$  Hz) agrees with the chemical environment of the regioisomer, 3) absence of a downfield  $^1\text{H}$  signal with approximately 50 Hz coupling implies no secondary or primary fluorides are present, 4) diagnostic methyl  $^1\text{H}$  signal shift (1.53 and 1.48 ppm) and coupling constant ( $J = 21.9$  Hz) for the fluoroisopropyl group, and 6) identification of distinguishable peaks (quaternary, C-F, etc.) in the  $^{13}\text{C}$  NMR spectrum are in agreement with the regioisomer assignment ( $^2J_{\text{CF}}$ - and  $^3J_{\text{CF}}$ -coupling and chemical shifts).

$^1\text{H}$  NMR (400 MHz,  $\text{CDCl}_3$ )  $\delta$  7.73 (d,  $J = 8.3$  Hz, 2H), 7.33 (d,  $J = 8.2$  Hz, 2H), 4.87-4.81 (m, 1H), 2.90-2.83 (m, 1H), 2.48- 2.38 (m, 4H), 2.22 (dd,  $J = 14.1, 3.9$  Hz, 1H), 2.10-1.99 (m, 5H), 1.92-1.75 (m, 2H), 1.71-1.54 (m, 5H), 1.48-1.42 (m, 5H), 1.03 (s, 3H).  $^{13}\text{C}\{^1\text{H}\}$  NMR (100 MHz,  $\text{CDCl}_3$ ):  $\delta$  207.1, 144.9, 133.8, 129.8, 128.0, 99.7 (d,  $J = 164.7$  Hz), 81.5, 79.0, 52.9, 50.2, 50.0, 48.1, 41.4, 36.7, 34.0, 29.6, 28.4, 28.1, 26.8, 26.5, 22.9, 22.8, 21.9, 19.4.  $^{19}\text{F}$  NMR (282 MHz,  $\text{CDCl}_3$ ):  $\delta$  -142.5 (dq,  $J = 55.7, 33.7, 11.4$  Hz). FTMS (ESI)  $m/z$   $\text{C}_{21}\text{H}_{31}\text{O}_5\text{SF}$  ( $\text{M}+\text{H}^+$ ): calc 427.1950, observed 427.1950.

2-((1*R*,2*R*,8*aR*)-4-fluoro-2-hydroxy-2,5,5,8*a*-tetramethyldecahydronaphthalen-1-yl)ethylacetate  
(compound **16**)

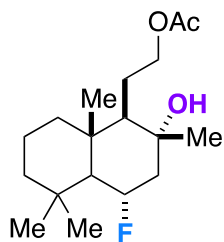

The reaction was run according to the general procedure, and the major diastereomer was isolated. The crude material was subjected to gradient column chromatography on silica gel eluting with hexanes and EtOAc, followed by HPLC purification.

Regiochemical and stereochemical assignments were made on the basis of 1) chemical shift in the  $^{19}\text{F}$  NMR signal, indicative of a secondary fluoride on a cyclohexane ring, 2) the chemical shift and coupling constant ( $J = 55.7$  Hz) of the  $^1\text{H}$  signal at 4.49 ppm are indicative of a proton with a geminal fluoride, 3) the -OH  $^1\text{H}$  signal shifts downfield (2.15 ppm) relative to the starting material and has a 5.7 Hz coupling constant (indicative of the alpha-fluoro configuration hydrogen bonding), 4) strong interaction within the  $^{19}\text{F}$ - $^1\text{H}$  HOESY spectrum between the -OH and fluoride infers the alpha-fluoro configuration, 5) interaction within the  $^1\text{H}$ - $^1\text{H}$  NOESY spectrum between the geminal proton to the fluorine and the methyl attached to the same carbon as the hydroxy group in the 3 position, 6) absence of a through-space coupling to the two methyl groups on the cyclohexane core infers the alpha-fluoro configuration, and 7) identification of distinguishable peaks (quaternary, C-F, etc.) in the  $^{13}\text{C}$  NMR spectrum are in agreement with the regioisomer assignment ( $^2J_{\text{CF}}$ - and  $^3J_{\text{CF}}$ -coupling and chemical shifts).

$^1\text{H}$  NMR (400 MHz,  $\text{CDCl}_3$ ):  $\delta$  4.49 (dm,  $J = 55.7$  Hz, 1H), 4.19-4.05 (m, 2H), 2.15 (dm,  $J = 6.8$  Hz, 1H), 2.09-2.01 (m, 4H), 1.84-1.75 (m, 1H), 1.69-1.60 (m, 3H), 1.54-1.34 (m, 5H), 1.24-1.15

(m, 1H), 1.13-1.12 (m, 3H), 0.98-0.90 (m, 1H), 0.87 (s, 3H), 0.80 (m, 6H).  $^{13}\text{C}\{^1\text{H}\}$  NMR (100 MHz,  $\text{CDCl}_3$ ): 171.3, 96.2 (d,  $J = 171.2$  Hz), 73.6, 73.4, 66.5, 52.9, 47.12, 47.11, 41.9, 39.4, 38.4, 33.1, 32.9, 25.5, 25.3, 24.0, 21.49, 21.48, 21.3, 21.2, 21.1, 18.5, 14.94, 14.92.  $^{19}\text{F}$  NMR (282 MHz,  $\text{CDCl}_3$ ):  $\delta$  -189.3 - (-189.7) (m). FTMS (ESI)  $m/z$   $\text{C}_{18}\text{H}_{31}\text{O}_3\text{F}$ : calc 314.2257, observed 298.2303 (corresponds to loss of  $-\text{OH} + \text{H}^+$ ).

2-(((1*R*,2*S*)-4-fluoro-2-hydroxy-2,6,6-trimethylcyclohexyl)ethyl acetate (compound 17)

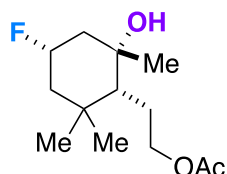

The reaction was run according to the general procedure, and the major diastereomer was isolated. The crude material was subjected to gradient column chromatography on silica gel eluting with hexanes and EtOAc, followed by HPLC purification.

Regiochemical and stereochemical assignments were made on the basis of 1) chemical shift in the  $^{19}\text{F}$  NMR signal, indicative of a secondary fluoride on a cyclohexane ring, 2) the chemical shift and coupling constant ( $J = 49.4$  Hz) of the  $^1\text{H}$  signal at 4.91 ppm are indicative of a proton with a geminal fluoride, 3) absence of a strong interaction between  $-\text{OH}$  and geminal proton to the fluorine in the  $^1\text{H}$ - $^1\text{H}$  NOESY, as well as interaction between the geminal proton and the methyl geminal to the alcohol, suggest the indicated diastereomer, 4) the  $^1\text{H}$  signal at 4.91 ppm (doublet of triplets of triplets) agrees with the proposed regioisomer, and 5) identification of distinguishable peaks (quaternary, C-F, etc.) in the  $^{13}\text{C}$  NMR spectrum are in agreement with the regioisomer assignment ( $^2J_{\text{CF}}$ - and  $^3J_{\text{CF}}$ -coupling and chemical shifts).

$^1\text{H}$  NMR (400 MHz,  $\text{CDCl}_3$ ):  $\delta$  4.91 (dt,  $J = 49.4, 11.5, 4.5$  Hz, 1H), 4.18-3.98 (m, 2H), 2.22-2.12 (m, 1H), 2.05 (s, 3H), 2.01-1.92 (m, 1H), 1.86-1.59 (m, 2H), 1.40-1.28 (m, 4H), 1.03-1.01 (m, 4H), 0.98 (s, 4H), 0.95-0.92 (m, 1H).  $^{13}\text{C}\{^1\text{H}\}$  NMR (100 MHz,  $\text{CDCl}_3$ ):  $\delta$  171.2, 88.1 (d,  $J = 167.1$ ), 75.0, 74.9, 65.9, 49.6, 49.6, 47.7, 47.5, 47.4, 47.3, 36.6, 36.4, 32.1, 31.3, 27.1, 24.3, 22.2, 21.2.  $^{19}\text{F}$  NMR (282 MHz,  $\text{CDCl}_3$ ):  $\delta$  -180.7 (dm,  $J = 49.4$  Hz). FTMS (ESI)  $m/z$   $\text{C}_{13}\text{H}_{23}\text{O}_3\text{F}$ : calc 246.1631, observed 229.1602 (corresponds to loss of  $-\text{OH}$ ).

(1*R*,3*S*)- and (1*S*,3*R*)-1-(4-chlorophenyl)-3-fluorocycloheptan-1-ol (compound 18)

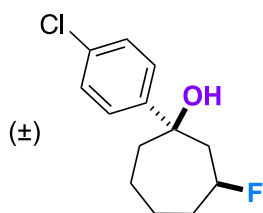

The reaction was run according to the general procedure (with the exception: 0.0 equiv. of  $\text{NaHCO}_3$  used), and the major diastereomer was isolated. The crude material was subjected to

gradient column chromatography on silica gel eluting with hexanes and EtOAc, followed by HPLC purification.

Regiochemical and stereochemical assignments were made on the basis of 1) chemical shift in the  $^{19}\text{F}$  NMR signal, indicative of a secondary fluoride on a cycloheptane ring, 2)  $^1\text{H}$  signal coupling constants (doublet of doublet of doublets,  $J = 44.66, 13.07, 2.17$  Hz) at 4.86 ppm agrees with the chemical environment of the regioisomer, 3) through-space coupling between the -OH and F ( $J = 4.05$  Hz) for the  $^1\text{H}$  peak at 2.56 ppm and a very strong interaction between -OH and -F in the  $^{19}\text{F}$ - $^1\text{H}$  HOESY spectrum (suggestive of a through-space coupling and intramolecular hydrogen bonding -OH---F-), 4) computational modeling at B3LYP 6-311++G\*\* show that only the 3-beta-fluoro has the geometrical possibility for intramolecular hydrogen bonding, and a strong interaction within the  $^{19}\text{F}$ - $^1\text{H}$  HOESY spectrum is observed, 5)  $^1\text{H}$  signal alpha to the alcohol shifted downfield (2.26 ppm), and 6) identification of distinguishable peaks (quaternary, C-F, etc.) in the  $^{13}\text{C}$  NMR spectrum are in agreement with the regioisomer assignment ( $^2J_{\text{CF}}$ - and  $^3J_{\text{CF}}$ -coupling and chemical shifts).

$^1\text{H}$  NMR (400 MHz,  $\text{CDCl}_3$ ):  $\delta$  7.47-7.45 (m, 2H), 7.37-7.35 (m, 2H), 4.86 (ddd,  $J = 44.66, 13.07, 2.17$  Hz, 1H), 2.57 (d,  $J = 4.05$  Hz, 1H), 2.31-2.22 (m, 1H), 1.99-1.76 (m, 5H), 1.74-1.48 (m, 4H).  $^{13}\text{C}\{^1\text{H}\}$  NMR (100 MHz,  $\text{CDCl}_3$ ):  $\delta$  145.91 (d,  $J = 1.52$  Hz), 132.76, 128.43, 126.18, 96.81 (d,  $J = 172.29$  Hz), 76.66 (d,  $J = 18.89$  Hz), 39.09 (d,  $J = 4.87$  Hz), 27.94 (d,  $J = 20.86$  Hz), 26.58, 21.51 (d,  $J = 13.63$  Hz), 19.97;  $^{19}\text{F}$  NMR (282 MHz,  $\text{CDCl}_3$ ):  $\delta$  -176.85 – (-177.03) (m). FTMS (ESI)  $m/z$   $\text{C}_{13}\text{H}_{16}\text{OF}$ : calc 242.0874, observed 225.0832 (corresponds to loss of -OH).

(1R,3S)- and (1S,3R)-1-(4-chlorophenyl)-3-fluorocyclopentan-1-ol (compound 19)

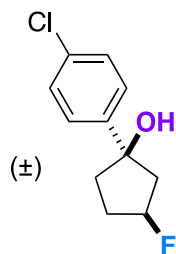

The reaction was run according to the general procedure (with the exception: 0.0 equiv. of  $\text{NaHCO}_3$  used), and the major diastereomer was isolated. The crude material was subjected to gradient column chromatography on silica gel eluting with hexanes and EtOAc, followed by HPLC purification.

Regiochemical and stereochemical assignments were made on the basis of 1) chemical shift in the  $^{19}\text{F}$  NMR signal, indicative of a secondary fluoride on a cycloheptane ring, 2)  $^1\text{H}$  signal at 4.80 ppm has a diagnostic geminal fluoride coupling ( $^2J_{\text{HF}} = 51.82$  Hz), 3) absence of a strong interaction between the geminal proton to fluorine and the -OH within the  $^1\text{H}$ - $^1\text{H}$  NOESY spectrum suggests the cis fluoro/hydroxy conformation, 4)  $^1\text{H}$  signal alpha to the alcohol shifted downfield (2.50 ppm), suggestive of intramolecular hydrogen bonding, and 5) identification of distinguishable peaks (quaternary, C-F, etc.) in the  $^{13}\text{C}$  NMR spectrum are in agreement with the regioisomer assignment ( $^2J_{\text{CF}}$ - and  $^3J_{\text{CF}}$ -coupling and chemical shifts).

$^1\text{H}$  NMR (400 MHz,  $\text{CDCl}_3$ ):  $\delta$  7.50-7.46 (m, 2H), 7.36-7.33 (m, 2H), 4.80 (dm,  $J = 51.82\text{Hz}$ , 1H), 2.47-2.26 (m, 2H), 2.10-1.94 (m, 4H).  $^{13}\text{C}\{^1\text{H}\}$  NMR (100 MHz,  $\text{CDCl}_3$ ):  $\delta$  140.14, 133.71, 128.39, 128.14 (d,  $J = 2.20\text{ Hz}$ ), 99.28 (d,  $J = 180.35\text{ Hz}$ ), 83.37 (d,  $J = 23.47$ ). 36.02 (d,  $J = 1.10\text{ Hz}$ ), 30.74 (d,  $J = 21.63\text{ Hz}$ ), 20.65.  $^{19}\text{F}$  NMR (282 MHz,  $\text{CDCl}_3$ ):  $\delta$  -173.90 – (-174.23) (m). FTMS (ESI)  $m/z$   $\text{C}_{11}\text{H}_{12}\text{OF}$ : calc 214.0561, observed 179.0428 (corresponds to loss of (-OH and -F) plus  $\text{H}^+$ ).

(1S,3S)- and (1R,3R)-3-fluoro-1-methyl-1,2,3,4-tetrahydronaphthalen-1-ol (compound 20)

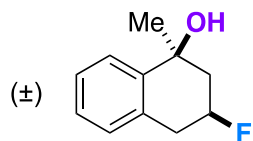

The reaction was run according to the general procedure (with the exception: 0.0 equiv. of  $\text{NaHCO}_3$  used), and the major diastereomer was isolated. The crude material was subjected to gradient column chromatography on silica gel eluting with hexanes and EtOAc, followed by HPLC purification.

Regiochemical and stereochemical assignments were made on the basis of 1) chemical shift in the  $^{19}\text{F}$  NMR signal, indicative of a secondary fluoride on a cyclohexane ring, 2)  $^1\text{H}$  signal coupling constants (doublet of doublet of doublets,  $J = 49.85, 10.16, 3.40\text{ Hz}$ ,) agrees with the chemical environment of the regioisomer, 3) absence of a strong interaction between -OH and geminal proton to the fluorine in the  $^1\text{H}$ - $^1\text{H}$  NOESY spectrum suggests the cis fluoro/hydroxy conformation, 4) benzylic  $^1\text{H}$  signals shifted downfield to 2.95 ppm, and 5) identification of distinguishable peaks (quaternary, C-F, etc.) in the  $^{13}\text{C}$  NMR spectrum are in agreement with the regioisomer assignment ( $^2J_{\text{CF}}$ - and  $^3J_{\text{CF}}$ -coupling and chemical shifts).

$^1\text{H}$  NMR (400 MHz,  $\text{CDCl}_3$ ):  $\delta$  7.62-7.60 (m, 1H), 7.24-7.19 (m, 2H), 7.10-7.08 (m, 1H), 4.80 (ddd,  $J = 49.85, 10.16, 3.40\text{ Hz}$ , 1H), 3.05-2.80 (m, 2H), 2.31-2.09 (m, 2H), 2.07 (s, 1H), 1.58 (d,  $J = 2.57\text{ Hz}$ , 3H).  $^{13}\text{C}\{^1\text{H}\}$  NMR (100 MHz,  $\text{CDCl}_3$ ):  $\delta$  140.48, 134.22, 128.31, 127.66, 126.85, 126.37, 96.84, 95.06, 72.95, 72.75, 26.50, 26.40, 25.70, 25.51, 25.34, 25.28.  $^{19}\text{F}$  NMR (282 MHz,  $\text{CDCl}_3$ ):  $\delta$  -191.36 – (-191.57) (m). FTMS (ESI)  $m/z$   $\text{C}_{11}\text{H}_{13}\text{OF}$ : calc 180.0950, observed 163.0910 (corresponds to loss of -OH).

(1S, 3S)- and (1R,3R)-3-fluoro-1-phenyl-2,3-dihydro-1H-inden-1-ol (compound 21)

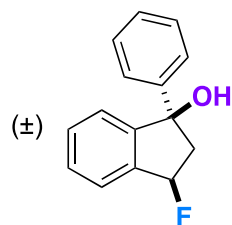

The reaction was run according to the general procedure, and the major diastereomer was isolated. The crude material was subjected to gradient column chromatography on silica gel eluting with hexanes and EtOAc, followed by HPLC purification.

Regiochemical and stereochemical assignments were made on the basis of 1) chemical shift in the  $^{19}\text{F}$  NMR signal, indicative of a secondary fluoride, 2)  $^1\text{H}$  signal at 5.15 ppm has a diagnostic geminal fluoride coupling ( $^2J_{\text{HF}} = 54.2$  Hz), 3) diagnostic -OH in the starting material (2.13 ppm, broad singlet) shifts downfield (3.21 ppm, doublet,  $J = 3.2$  Hz), 4) very strong interaction between -OH and -F in the  $^{19}\text{F}$ - $^1\text{H}$  HOESY spectrum (suggestive of a through-space coupling and intramolecular hydrogen bonding -OH---F-), and 5) identification of distinguishable peaks (quaternary, C-F, etc.) in the  $^{13}\text{C}$  NMR spectrum are in agreement with the regioisomer assignment ( $^2J_{\text{CF}}$ - and  $^3J_{\text{CF}}$ -coupling and chemical shifts).

$^1\text{H}$  NMR (400 MHz,  $\text{CDCl}_3$ ):  $\delta$  7.40-7.28 (m, 7H), 7.23-7.20 (m, 2H), 5.15 (dm,  $J = 54.2$  Hz, 1H), 3.21, (d,  $J = 3.80$  Hz, 1H), 3.17-3.12 (m, 2H).  $^{13}\text{C}\{^1\text{H}\}$  NMR (100 MHz,  $\text{CDCl}_3$ ):  $\delta$  144.19, 141.59, 141.57, 139.37, 139.36, 129.23, 128.36, 128.01, 127.93, 126.55, 126.54, 125.28, 125.07, 101.37, 99.50, 85.19, 85.02, 35.99, 35.76.  $^{19}\text{F}$  NMR (282 MHz,  $\text{CDCl}_3$ ):  $\square$  -186.21 - -186.51 (m). TOF MS(Cl)  $m/z$   $\text{C}_{11}\text{H}_{13}\text{OF}$ : calc 228.0950, observed 211.0596 (corresponds to loss of -OH).

(1S,2S,4R,6R)-6-fluoro-1,3,3-trimethylbicyclo[2.2.1]heptan-2-ol (compound 22)

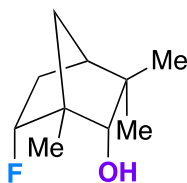

The reaction was run according to the general procedure (with the exception: 1.2 equiv. of Selectfluor used), and the major diastereomer was isolated. The crude material was subjected to gradient column chromatography on silica gel eluting with hexanes and EtOAc, followed by HPLC purification.

Regiochemical and stereochemical assignments were made on the basis of 1) chemical shift in the  $^{19}\text{F}$  NMR signal, indicative of a secondary fluoride, 2)  $^1\text{H}$  signal at 4.83 ppm has a diagnostic geminal fluoride coupling ( $^2J_{\text{HF}} = 56.4$  Hz), 3) diagnostic -OH in the starting material (1.36 ppm, broad singlet) shifts downfield (1.78 ppm, doublet,  $J = 3.2$  Hz), 4) very strong interaction between -OH and -F in the  $^{19}\text{F}$ - $^1\text{H}$  HOESY spectrum (suggestive of a through-space coupling and intramolecular hydrogen bonding -OH---F-), 5) C10 methyl at the ring junction has a drastic shift to 1.23 ppm and coupling of 1.7 Hz, and 6) identification of distinguishable peaks (quaternary, C-F, etc.) in the  $^{13}\text{C}$  NMR spectrum are in agreement with the regioisomer assignment ( $^2J_{\text{CF}}$ - and  $^3J_{\text{CF}}$ -coupling and chemical shifts).

$^1\text{H}$  NMR (400 MHz,  $\text{CDCl}_3$ ):  $\delta$  4.83 (dm,  $J = 56.44$  Hz, 1H), 3.41 (dd,  $J = 6.70, 3.90$  Hz, 1H), 2.39-2.30 (m, 1H), 1.78 (d,  $J = 4.13$  Hz, 1H), 1.45-1.44 (m, 2H), 1.32-1.30 (m, 1H), 1.23 (d,  $J = 1.70$  Hz, 3H), 1.05 (s, 3H), 0.92-0.89 (m, 2H), 0.86 (s, 3H).  $^{13}\text{C}\{^1\text{H}\}$  NMR (100 MHz,  $\text{CDCl}_3$ ):  $\delta$  93.73, 91.94, 84.16, 84.08, 46.69, 39.26, 36.85, 36.28, 36.08, 30.36, 19.99, 14.37, 14.32.  $^{19}\text{F}$

NMR (282 MHz, CDCl<sub>3</sub>): □ m (-183.85 - -184.27). TOF MS (Cl) m/z C<sub>11</sub>H<sub>13</sub>OF: calc 172.1270, observed 172.1263

(1R,2R,4S,5S,9s)-9-(4-chlorophenyl)-2,4-difluorobicyclo[3.3.1]nonan-9-ol (compound 23)

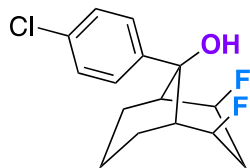

The reaction was run according to the general procedure (with the exception: 3.0 equiv. of Selectfluor used), and the major diastereomer was isolated. The crude material was subjected to gradient column chromatography on silica gel eluting with hexanes and EtOAc, followed by HPLC purification.

Regiochemical and stereochemical assignments were made on the basis of 1) chemical shift in the <sup>19</sup>F NMR signal, indicative of a secondary fluoride, 2) the <sup>1</sup>H signal at 5.05 ppm has a diagnostic geminal fluoride coupling (<sup>2</sup>J<sub>HF</sub> = 48.06 Hz), 3) considering the symmetry of the molecule—the <sup>13</sup>C and <sup>1</sup>H spectra agree with the proposed structure (e.g. integrations, # of peaks, and coupling) 4) diagnostic -OH is a triplet due to through-space coupling with the two fluorines, 5) <sup>1</sup>H signal alpha to the alcohol is shifted downfield (3.28 ppm), suggestive of intramolecular hydrogen bonding, and 6) identification of distinguishable peaks (quaternary, C-F, etc.) in the <sup>13</sup>C NMR spectrum are in agreement with the regioisomer assignment (<sup>2</sup>J<sub>CF</sub>- and <sup>3</sup>J<sub>CF</sub>-coupling and chemical shifts).

<sup>1</sup>H NMR (400 MHz, CDCl<sub>3</sub>): δ 7.49-7.47 (m, 2H), 7.40-7.38 (m, 2H), 5.06 (dd, J = 48.06, 5.81 Hz, 2H), 3.28 (t, J = 19.20, 9.60 Hz, 1H), 3.08 (d, J = 17.07 Hz, 2H), 2.78-2.37 (m, 2H), 1.83-1.71 (m, 2H), 1.62-1.56 (m, 2H), 1.37-1.30 (m, 1H), 1.27-1.13 (m, 1H). <sup>13</sup>C{<sup>1</sup>H} NMR (100 MHz, CDCl<sub>3</sub>): δ 141.47, 133.39, 129.02, 127.23, 93.56 (d, J = 170.74 Hz) 73.38, 40.58 (d, J = 8.02 Hz) 34.81 (t, J = 46.50, 23.25 Hz), 29.72, 25.58 (d, J = 10.35 Hz), 17.56. <sup>19</sup>F NMR (282 MHz, CDCl<sub>3</sub>): □ -152.62 – (-153.00) (m). FTMS (ESI) m/z C<sub>15</sub>H<sub>17</sub>OF<sub>2</sub>: calc 286.0986, observed 269.0900 (corresponds to loss of -OH).



## Spectral Data for Starting Materials

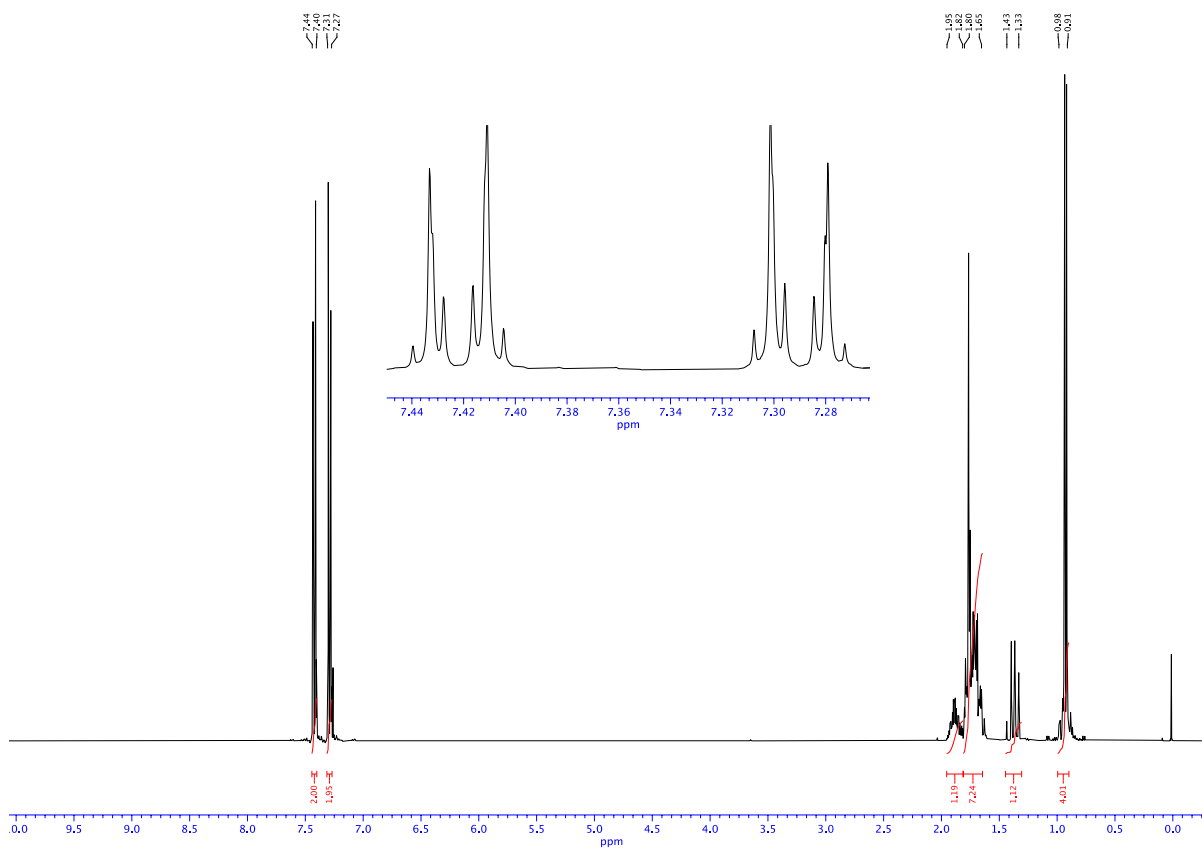

**Fig. S1.** <sup>1</sup>H NMR spectrum (CDCl<sub>3</sub>, 400 MHz) of compound **5**.

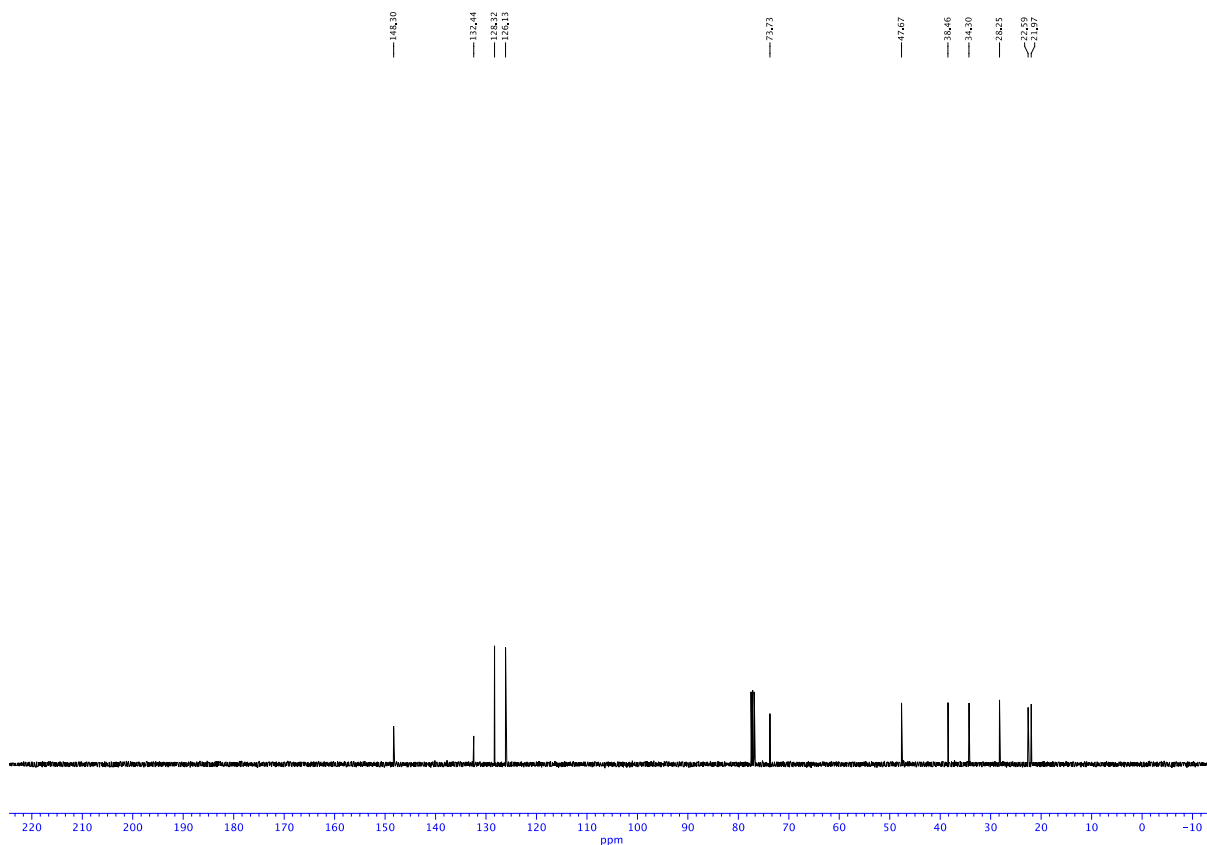

**Fig. S2.**  $^{13}\text{C}\{^1\text{H}\}$  NMR spectrum ( $\text{CDCl}_3$ , 100 MHz) of compound **5**.



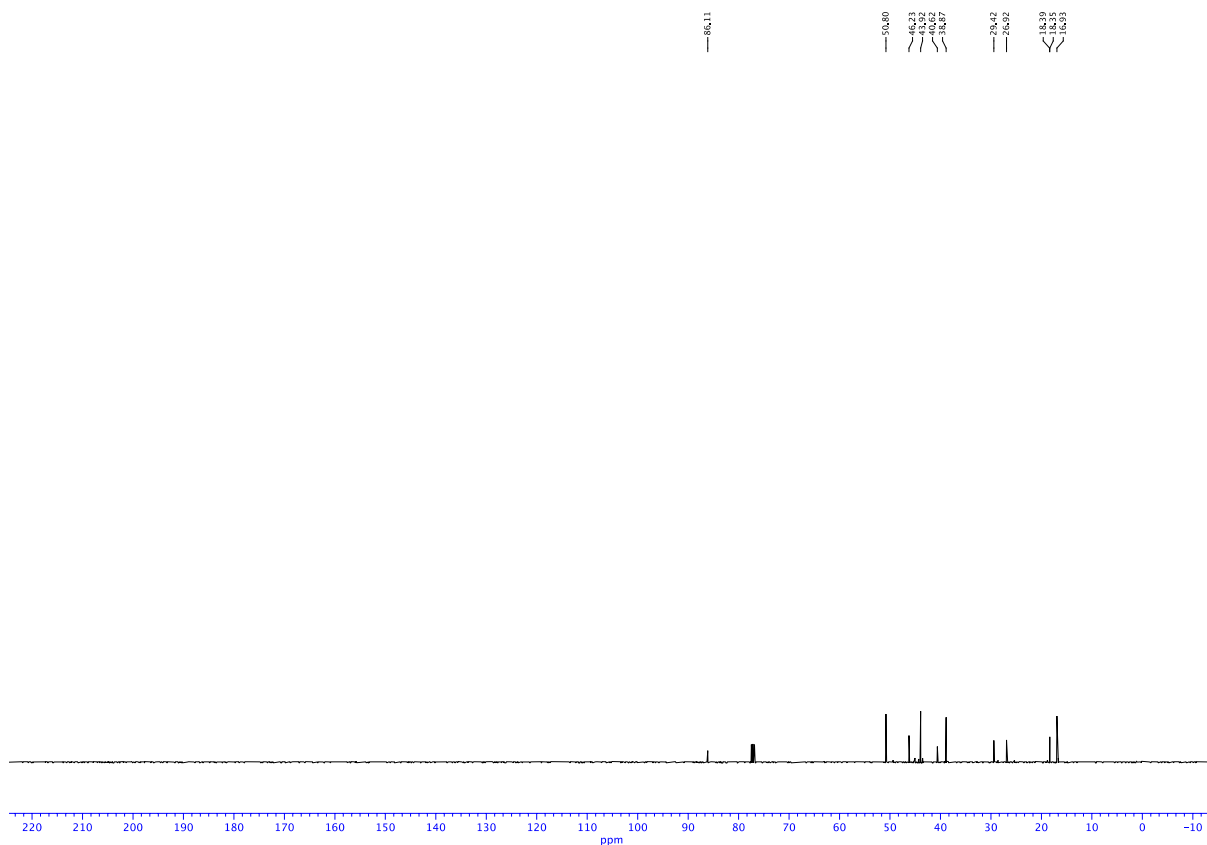

**Fig. S4.**  $^{13}\text{C}\{^1\text{H}\}$  NMR spectrum ( $\text{CDCl}_3$ , 100 MHz) of starting material for compound **8**.

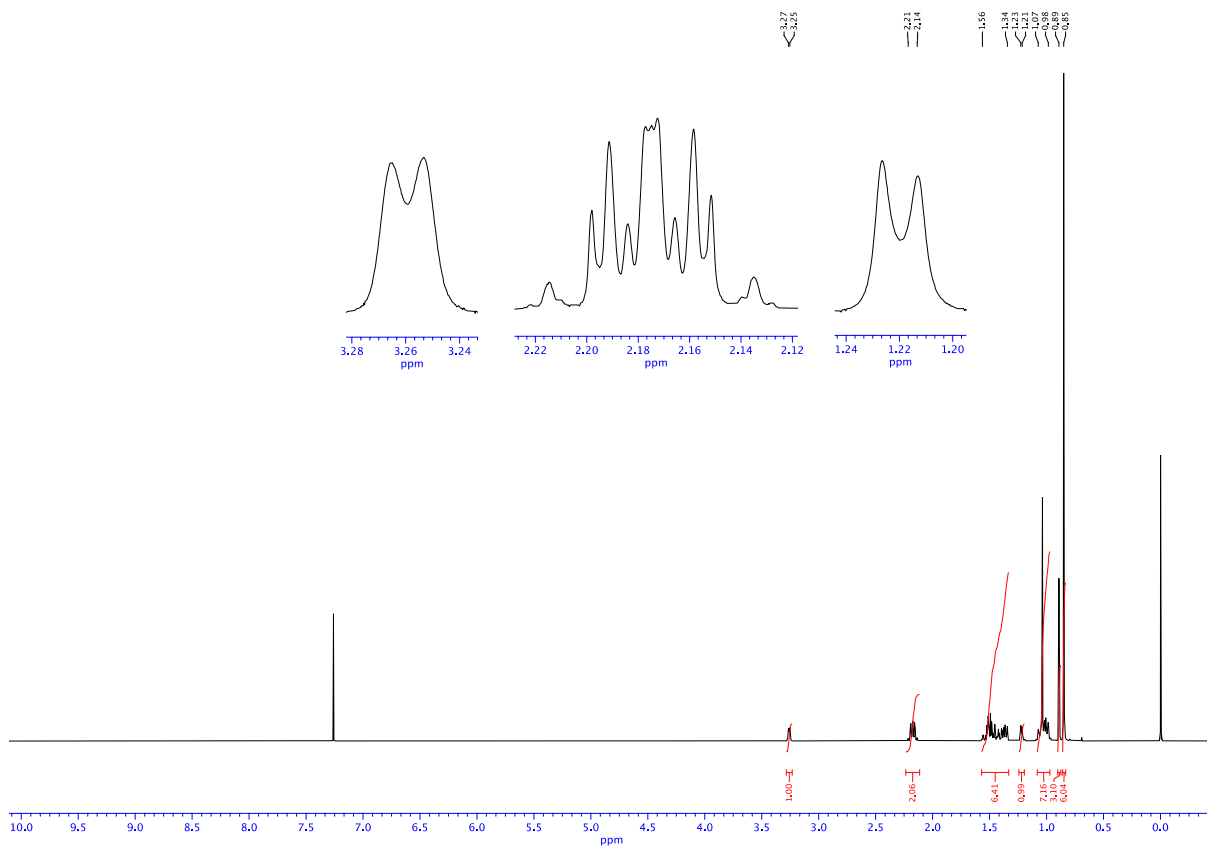

**Fig. S5.**  $^1\text{H}$  NMR spectrum ( $\text{CDCl}_3$ , 400 MHz) of starting material for compound **9**.

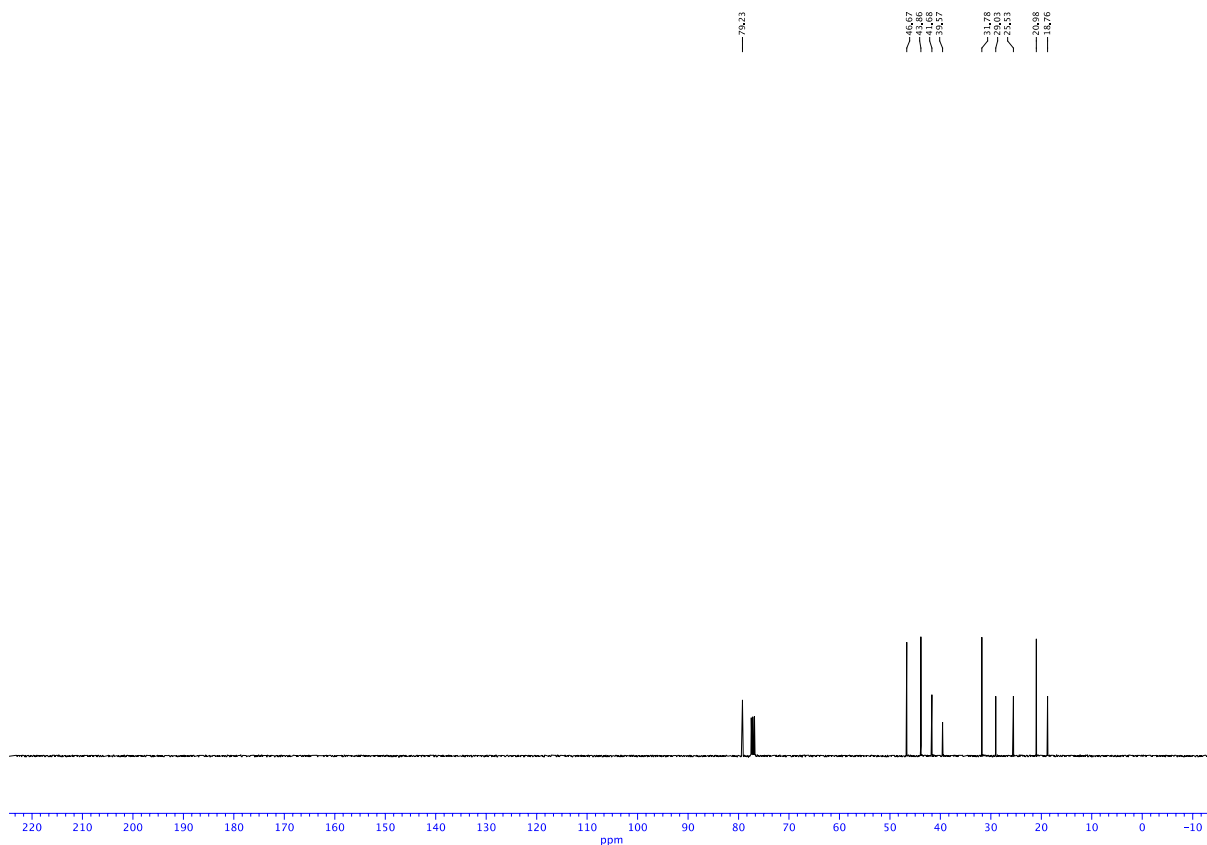

**Fig. S6.**  $^{13}\text{C}\{^1\text{H}\}$  NMR spectrum ( $\text{CDCl}_3$ , 100 MHz) of starting material for compound **9**.

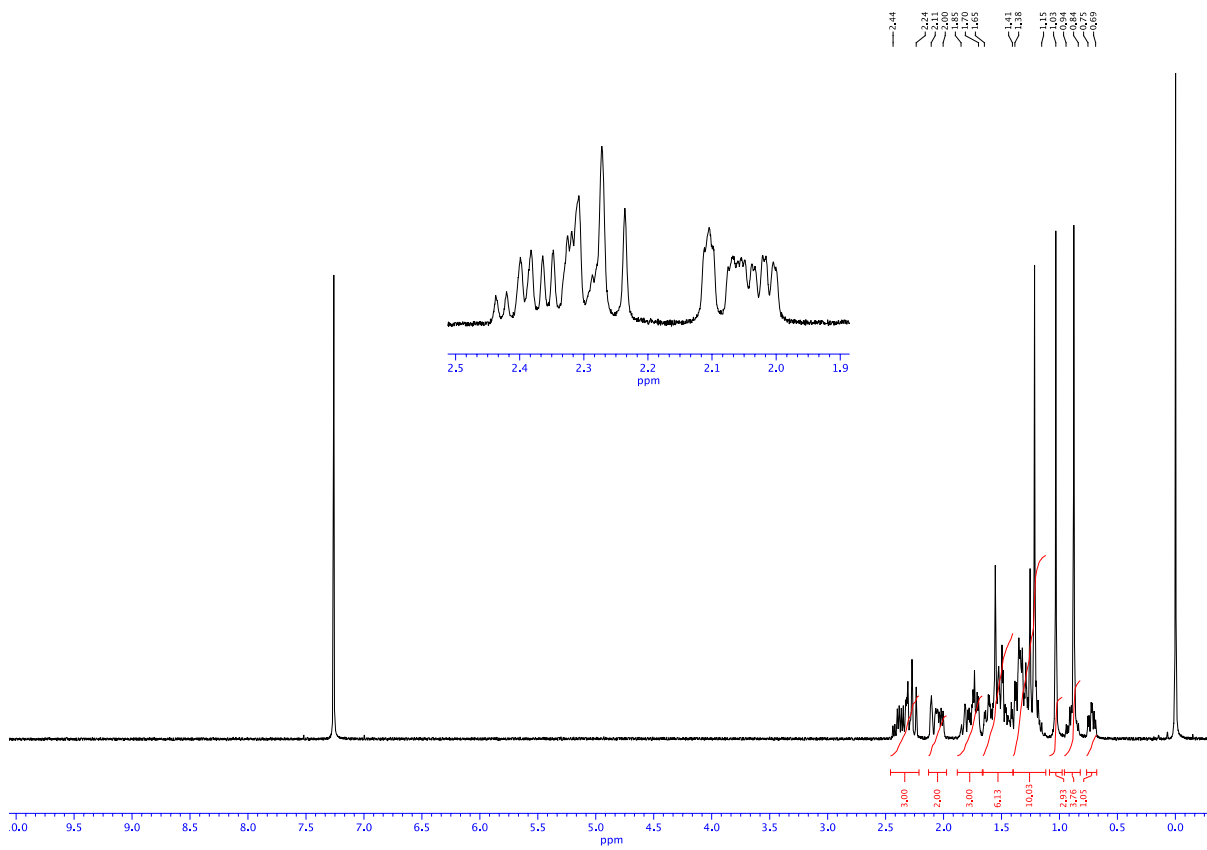

**Fig. S7.**  $^1\text{H}$  NMR spectrum ( $\text{CDCl}_3$ , 400 MHz) of starting material for compound **10**.

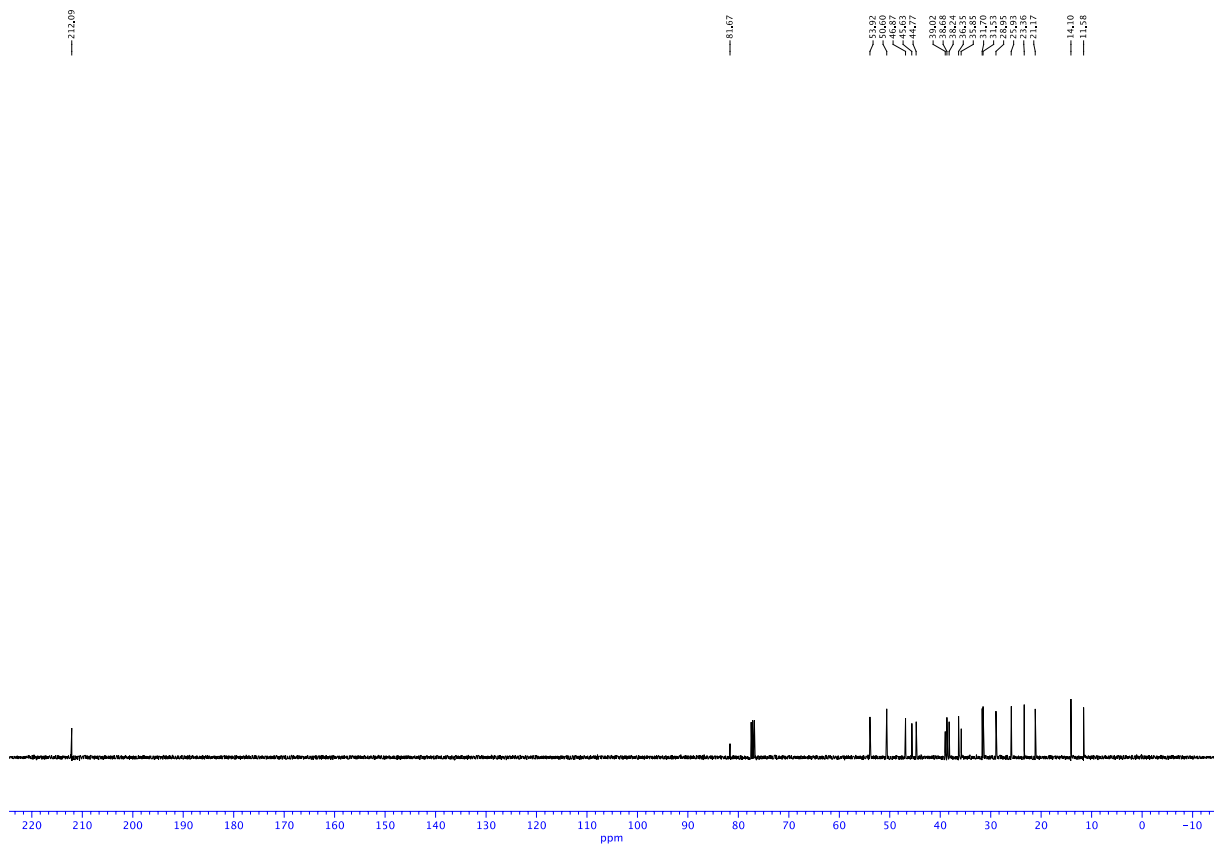

**Fig. S8.**  $^{13}\text{C}\{^1\text{H}\}$  NMR spectrum ( $\text{CDCl}_3$ , 100 MHz) of starting material for compound **10**.



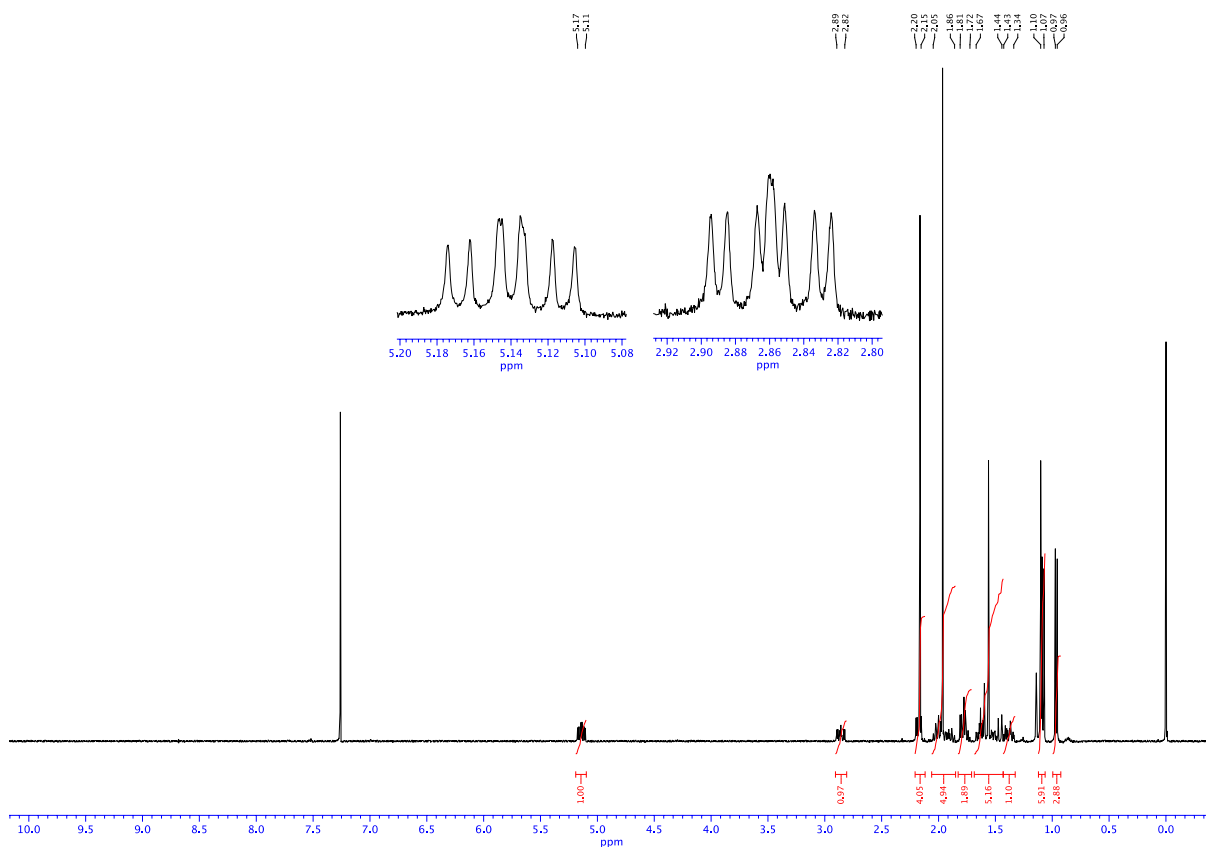

**Fig. S9.**  $^1\text{H}$  NMR spectrum ( $\text{CDCl}_3$ , 400 MHz) of starting material for compound **14**.

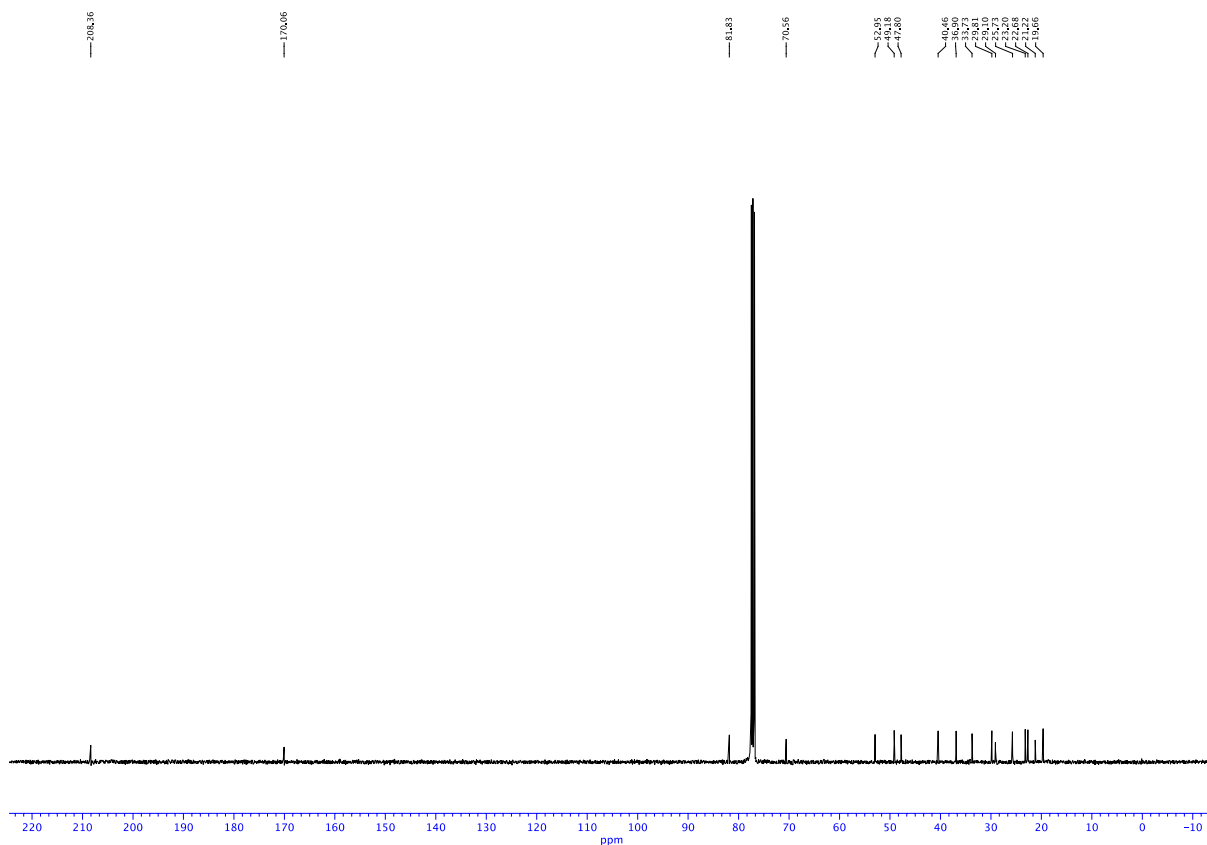

**Fig. S10.**  $^{13}\text{C}\{^1\text{H}\}$  NMR spectrum ( $\text{CDCl}_3$ , 100 MHz) of starting material for compound **14**.

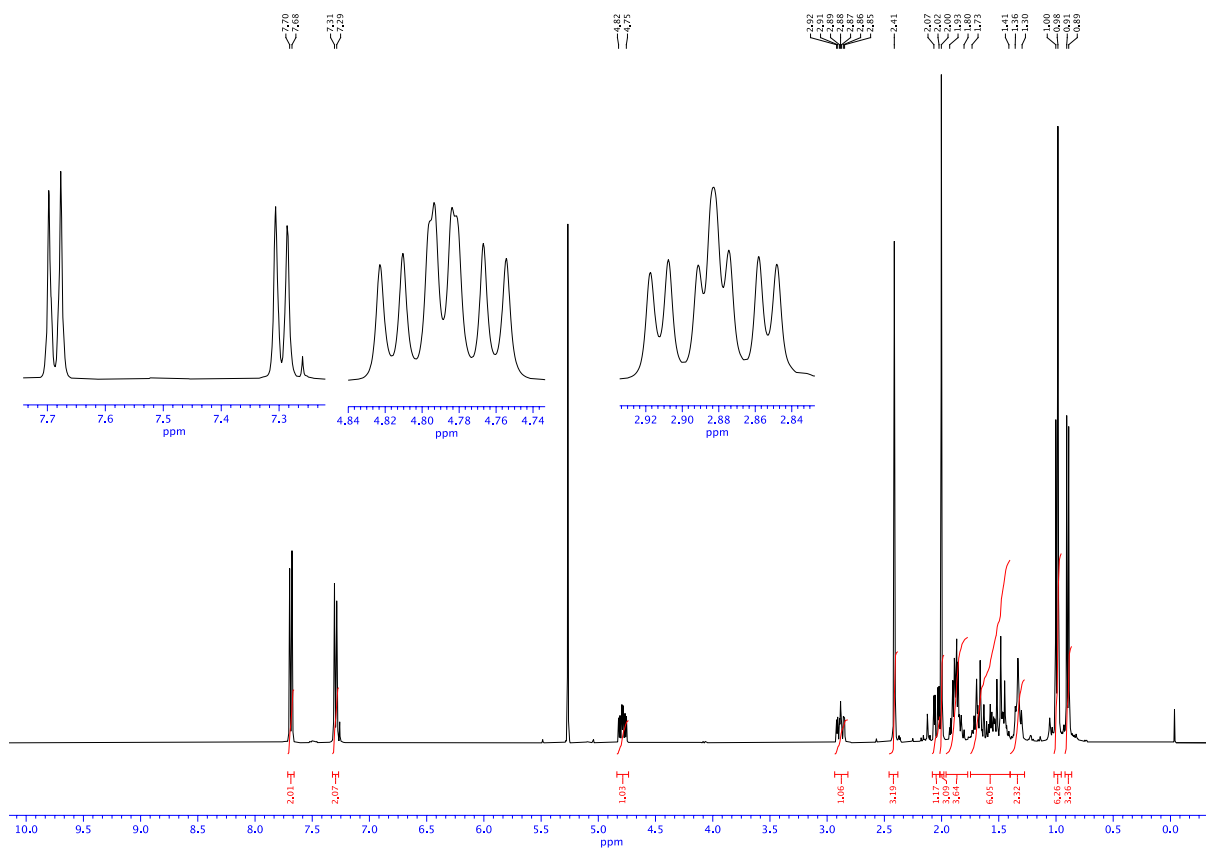

**Fig. S11.**  $^1\text{H}$  NMR spectrum ( $\text{CDCl}_3$ , 400 MHz) of starting material for compound **15**.

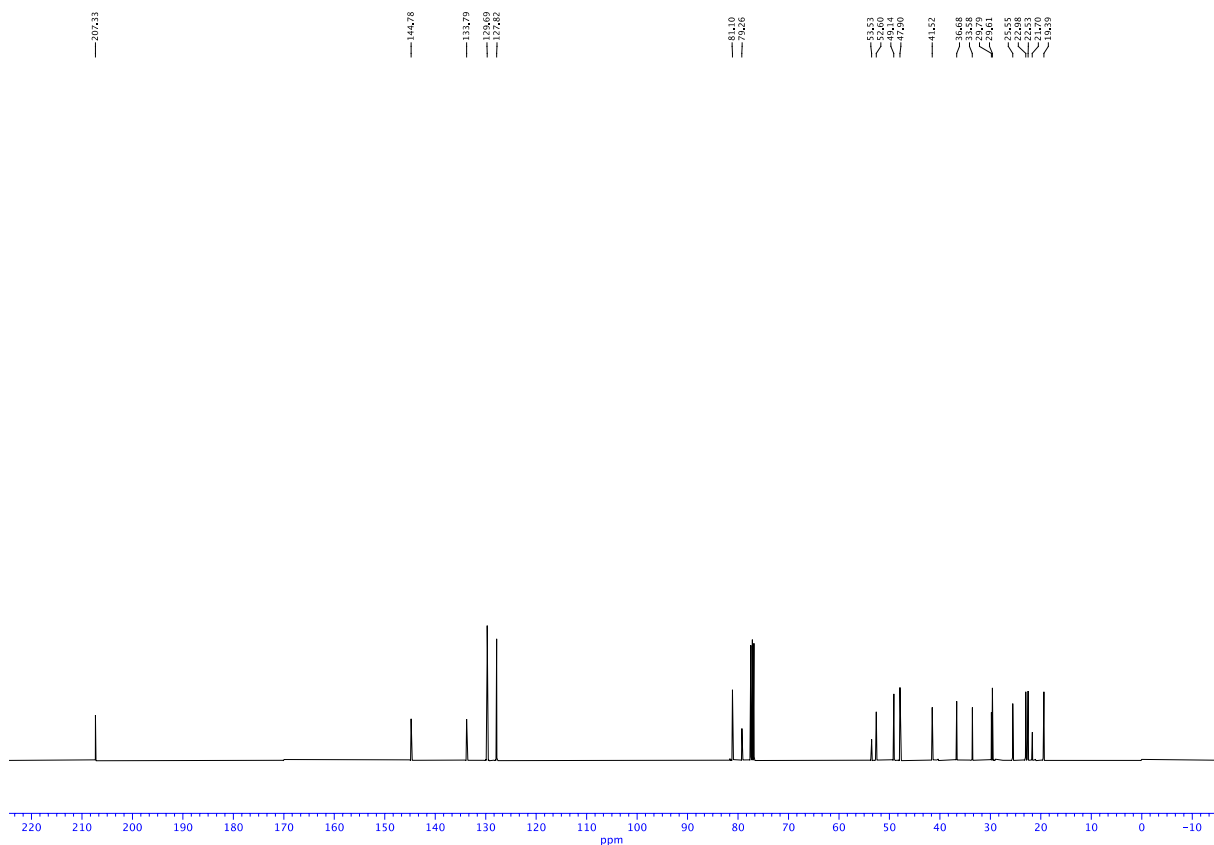

**Fig. S12.**  $^{13}\text{C}\{^1\text{H}\}$  NMR spectrum ( $\text{CDCl}_3$ , 100 MHz) of starting material for compound **15**.



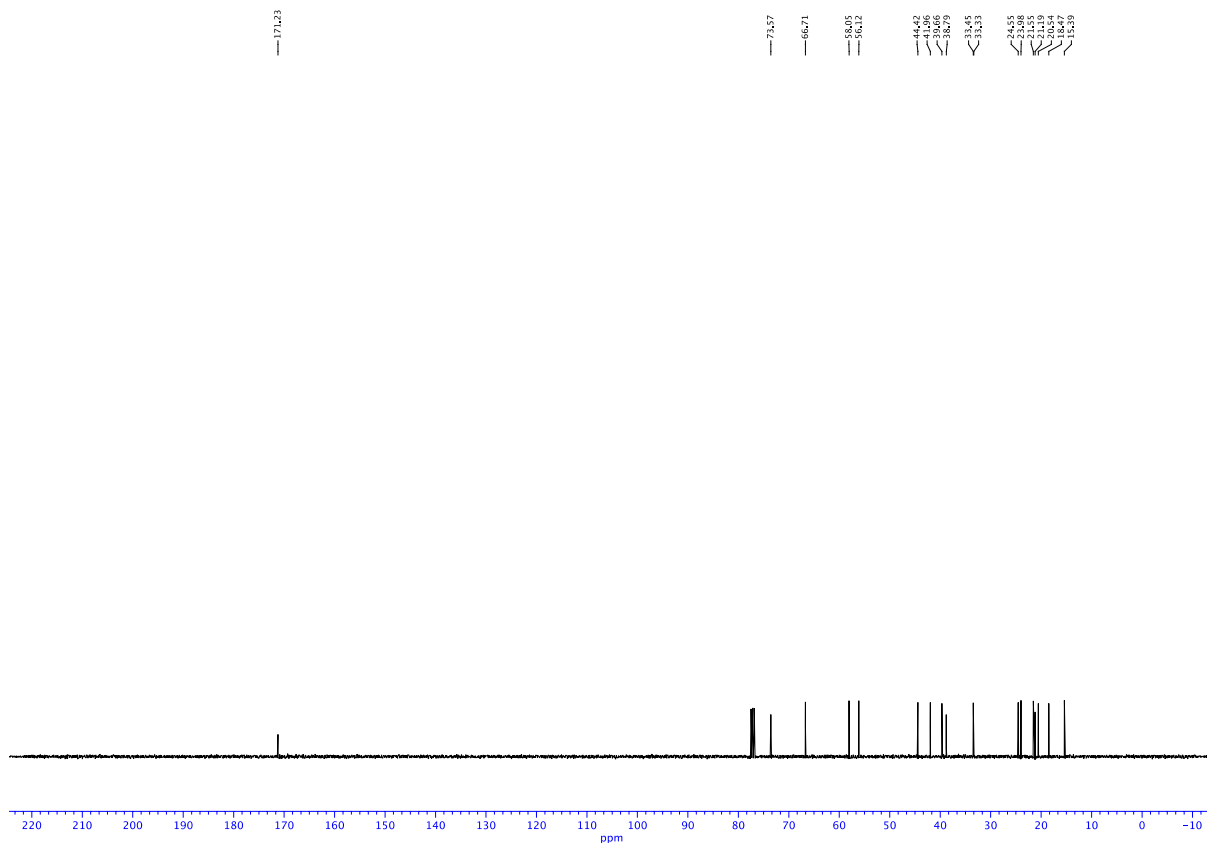

**Fig. S14.**  $^{13}\text{C}\{^1\text{H}\}$  NMR spectrum ( $\text{CDCl}_3$ , 100 MHz) of starting material for compound **16**.

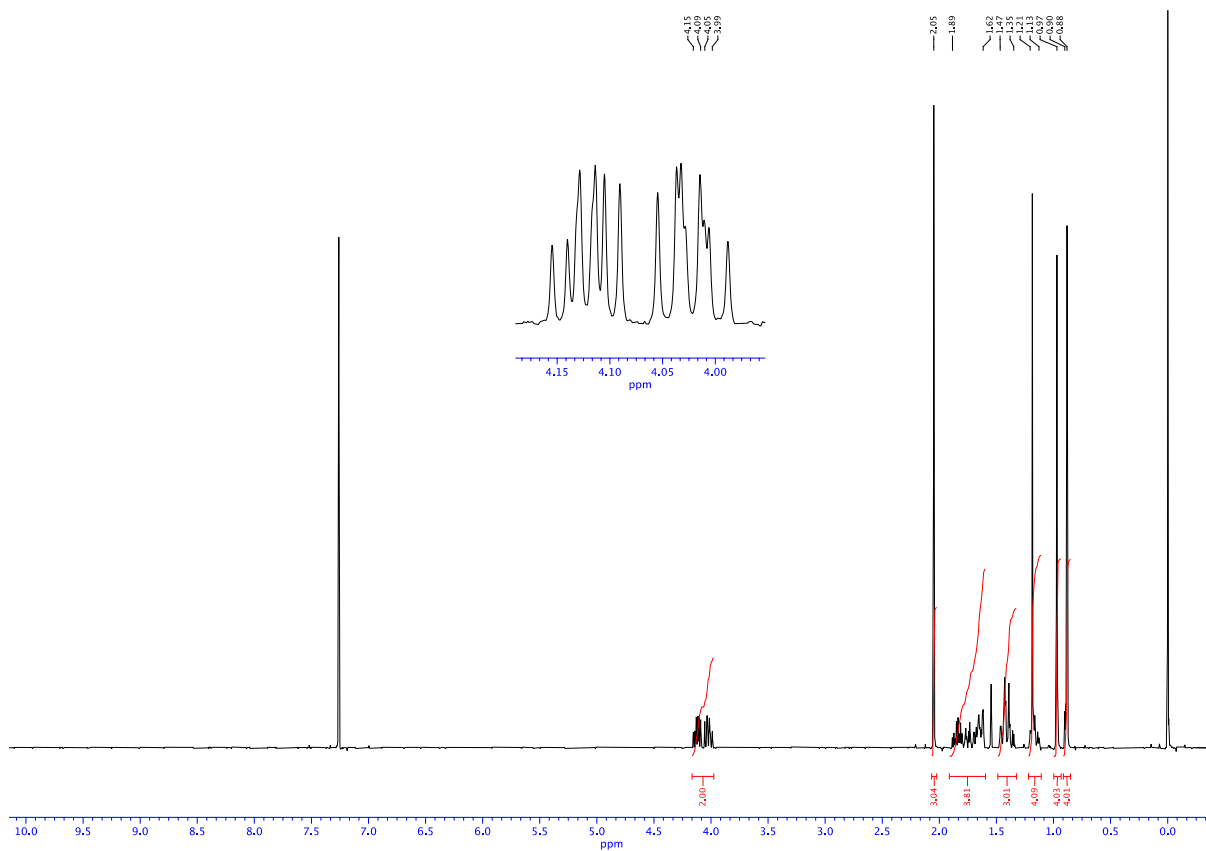

**Fig. S15.**  $^1\text{H}$  NMR spectrum ( $\text{CDCl}_3$ , 400 MHz) of starting material for compound **17**.

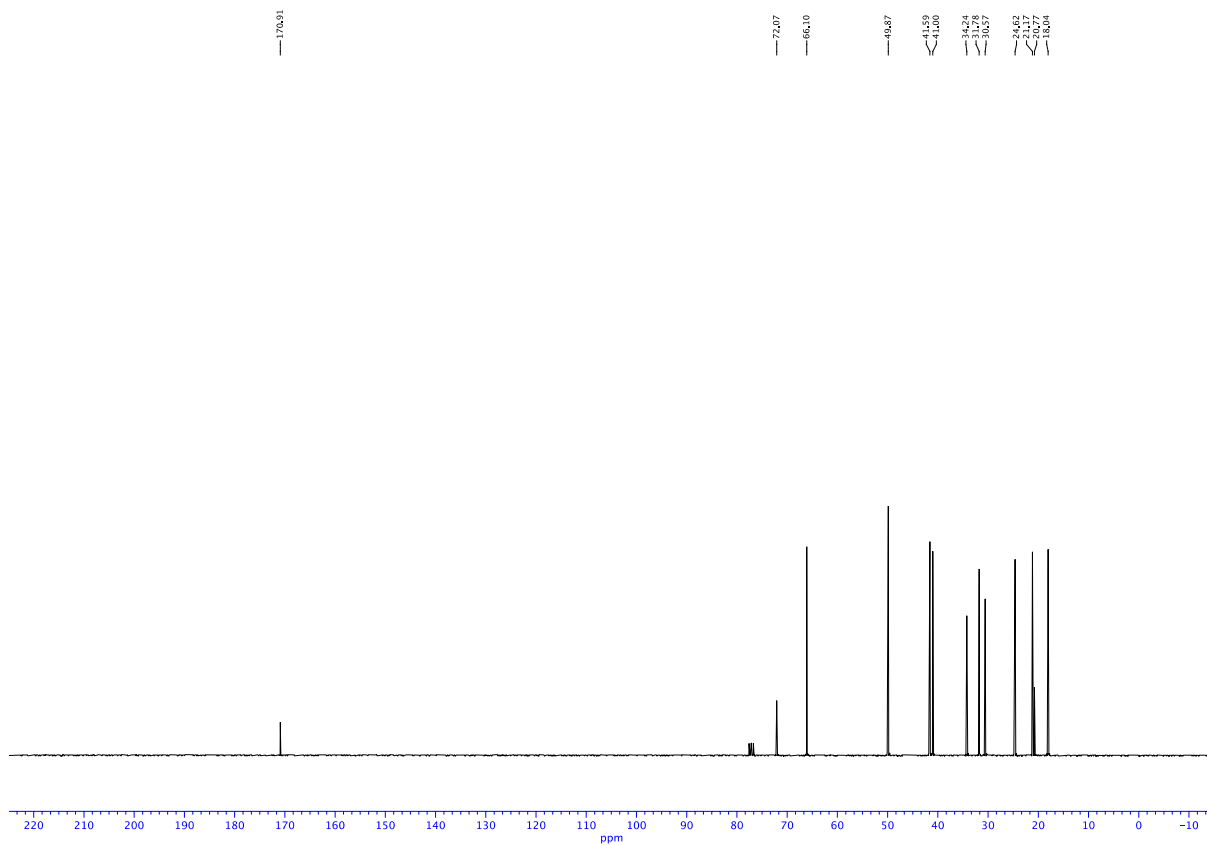

**Fig. S16.**  $^{13}\text{C}\{^1\text{H}\}$  NMR spectrum ( $\text{CDCl}_3$ , 100 MHz) of starting material for compound **17**.



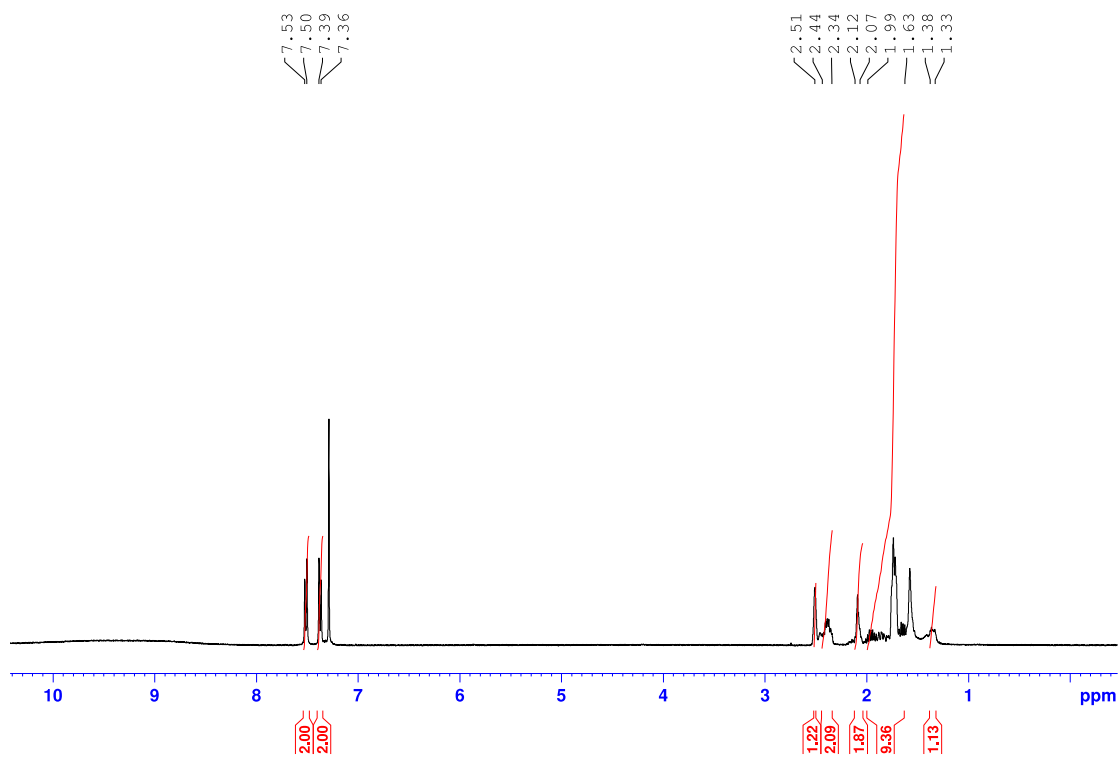

**Fig. S17.** <sup>1</sup>H NMR spectrum (CDCl<sub>3</sub>, 400 MHz) of starting material for compound **23**.

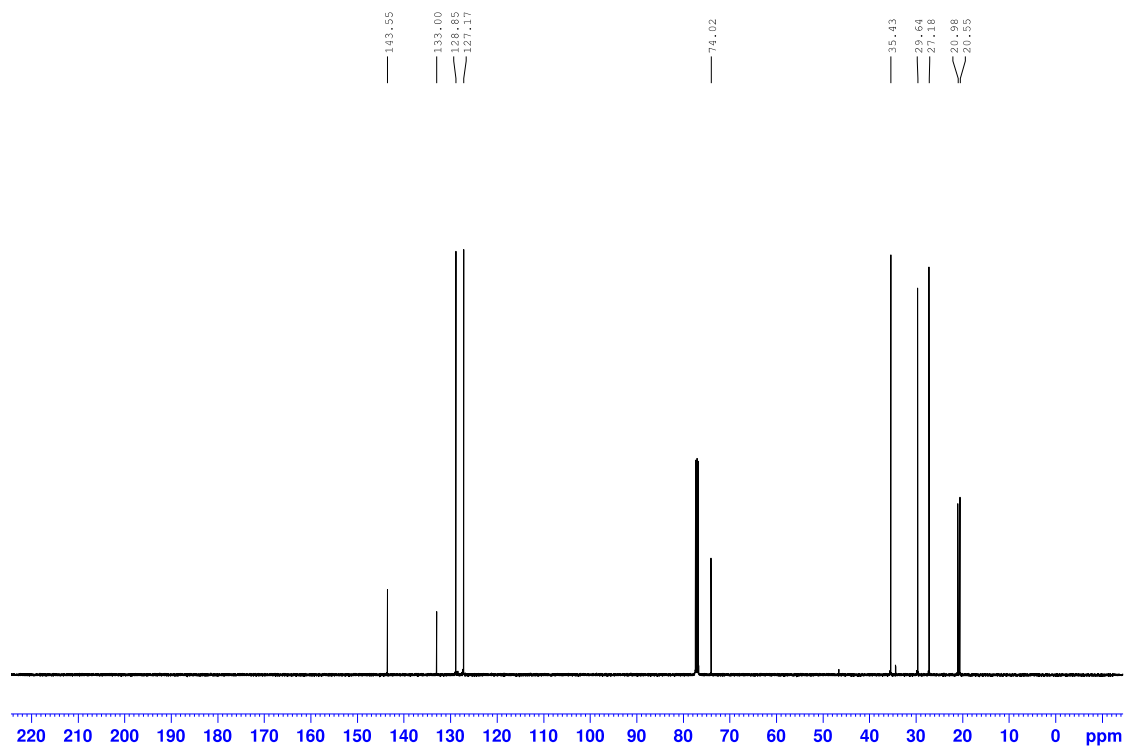

**Fig. S18.**  $^{13}\text{C}\{^1\text{H}\}$  NMR spectrum ( $\text{CDCl}_3$ , 100 MHz) of starting material for compound **23**.



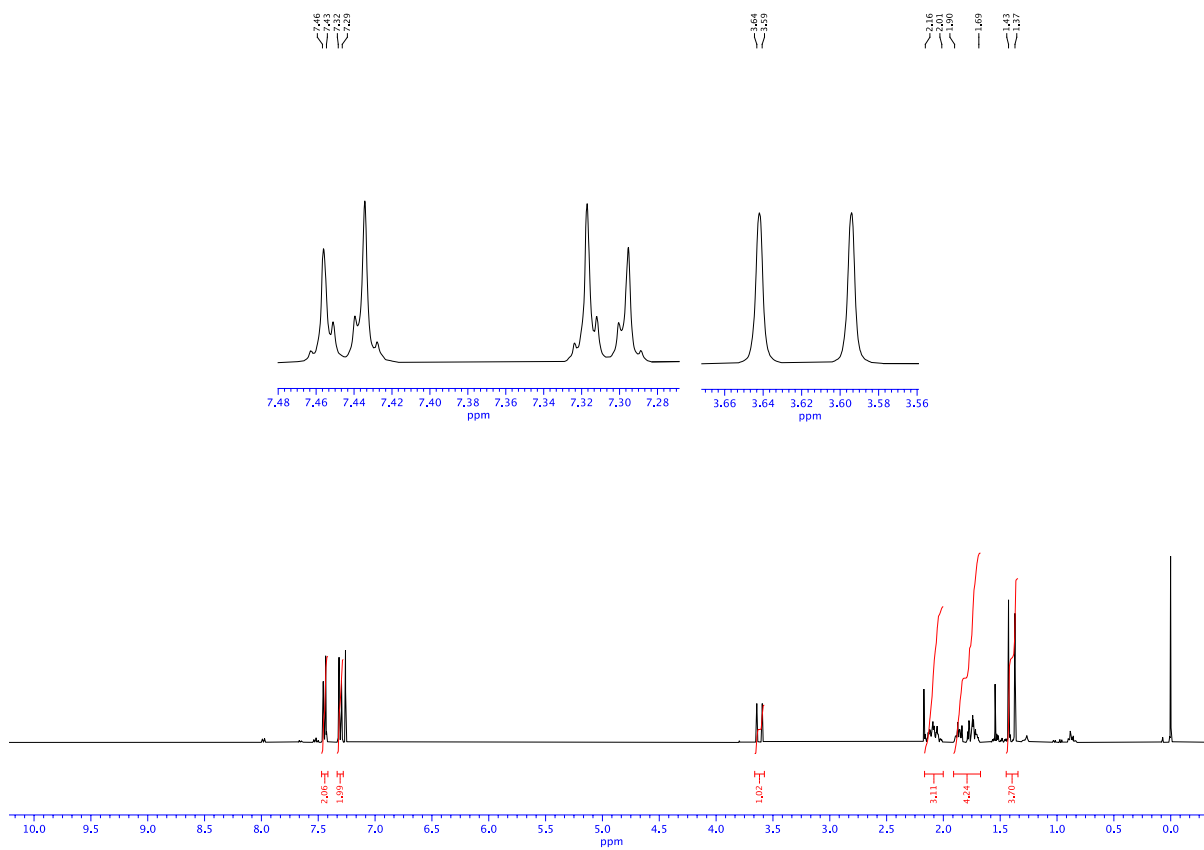

**Fig. S20.**  $^1\text{H}$  NMR spectrum ( $\text{CDCl}_3$ , 400 MHz) of compound **6**.

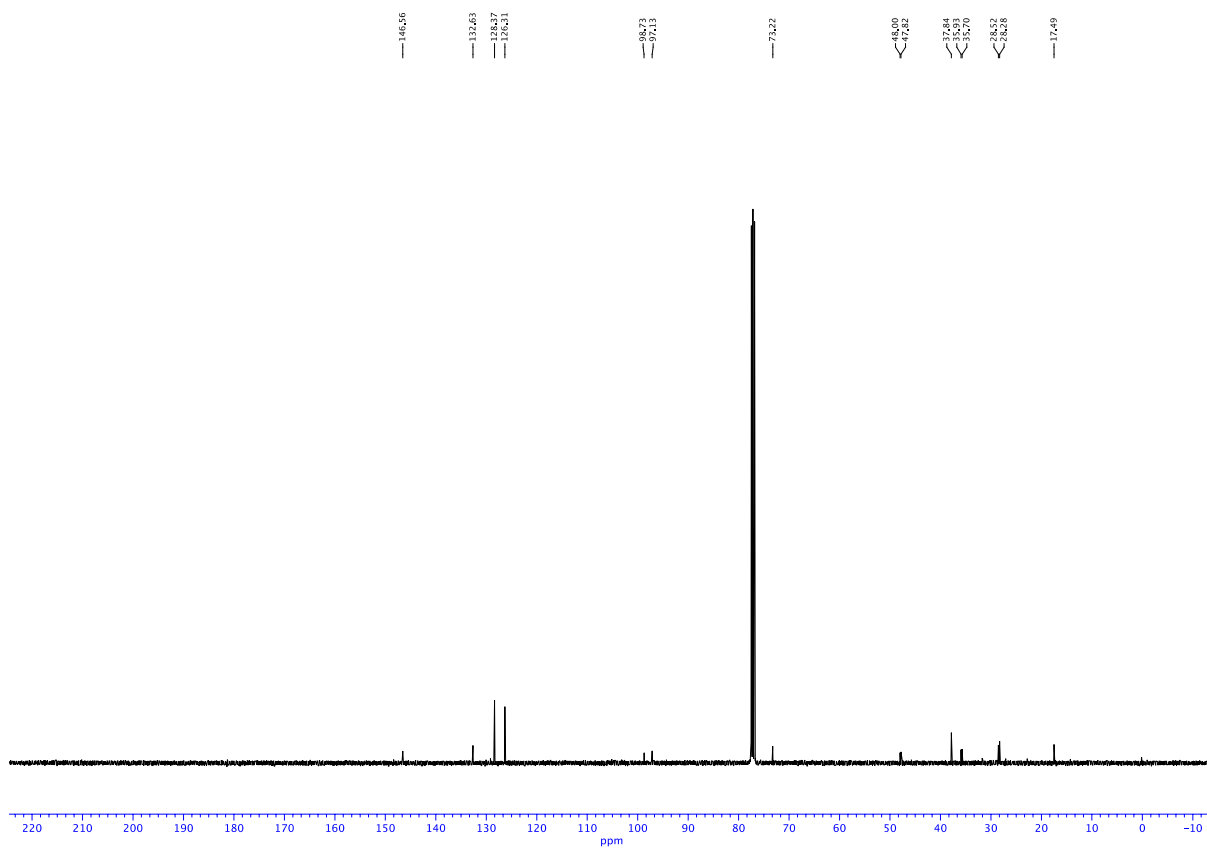

**Fig. S21.**  $^{13}\text{C}\{^1\text{H}\}$  NMR spectrum ( $\text{CDCl}_3$ , 100 MHz) of compound **6**.

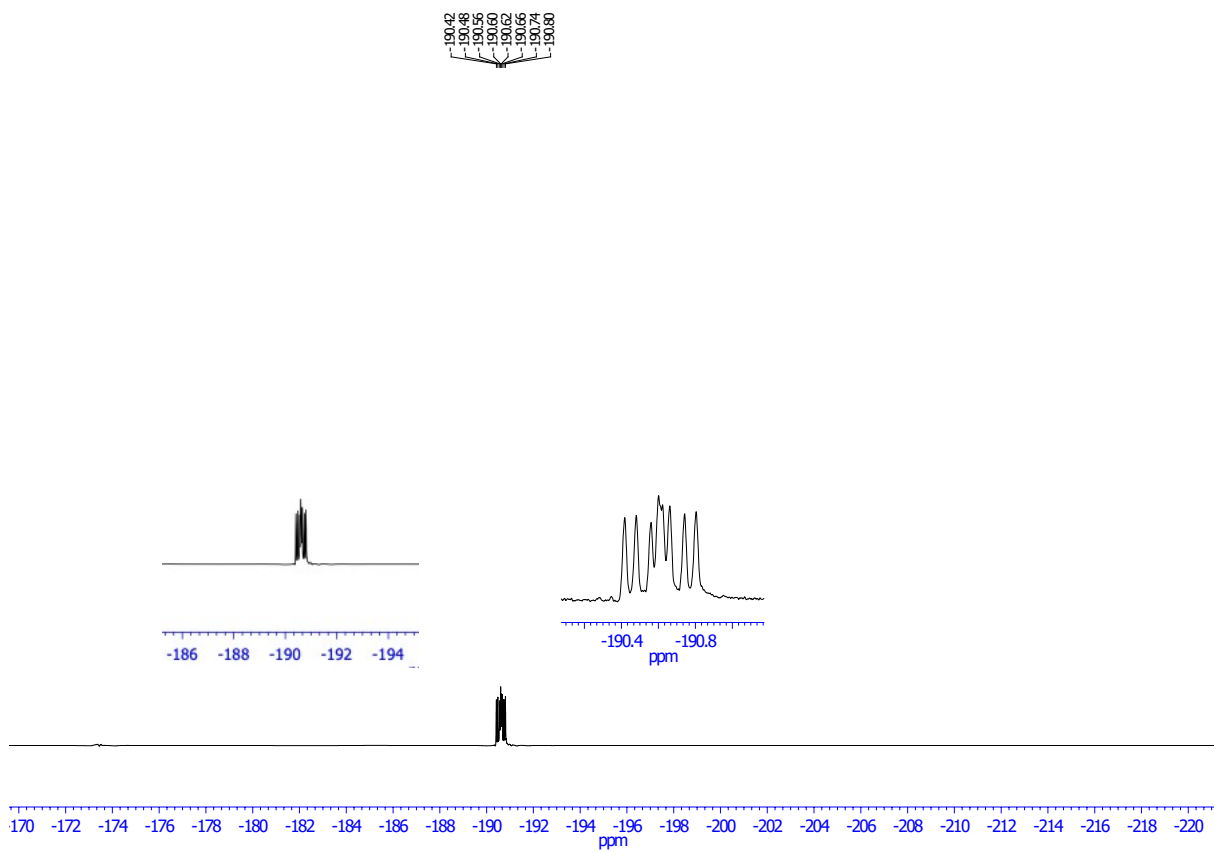

**Fig. S22.**  $^{19}\text{F}$  NMR spectrum ( $\text{CDCl}_3$ , 282 MHz) of compound 7.

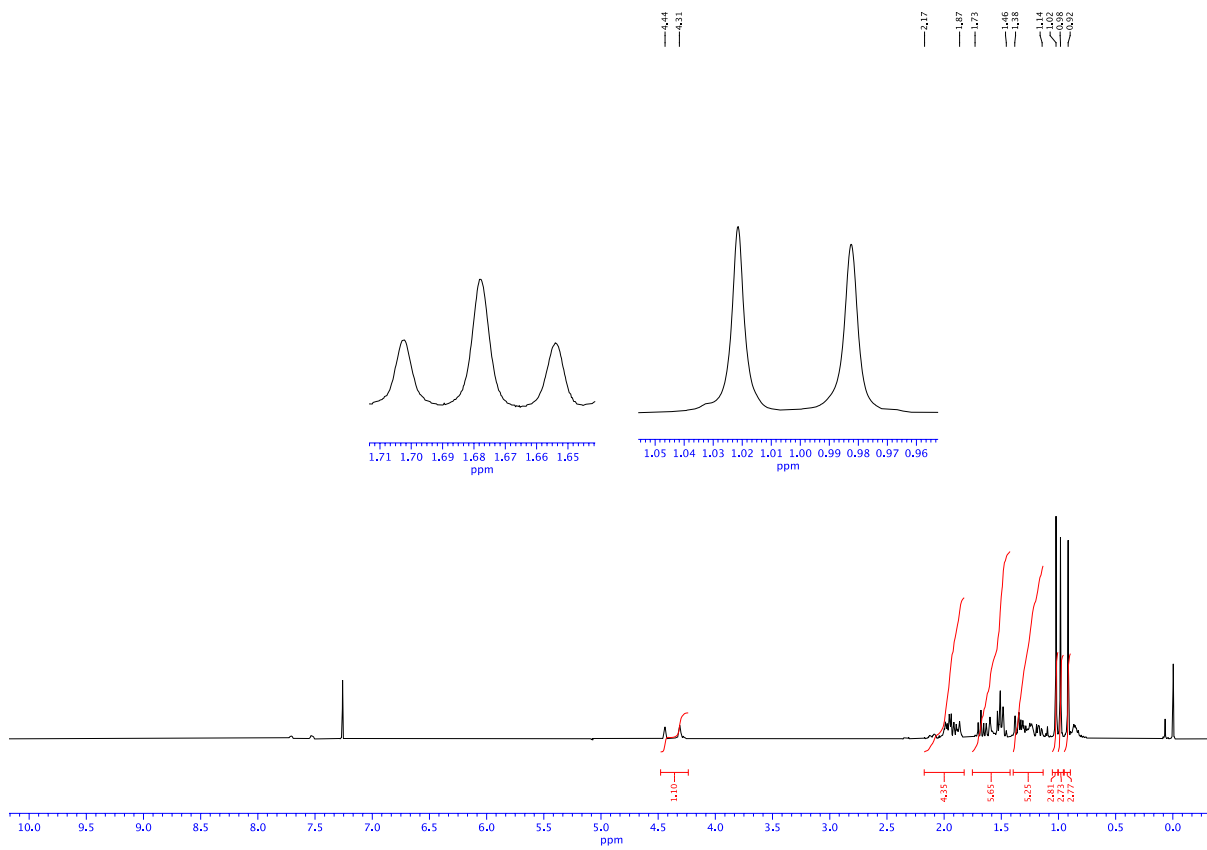

**Fig. S23.**  $^1\text{H}$  NMR spectrum ( $\text{CDCl}_3$ , 400 MHz) of compound **7**.

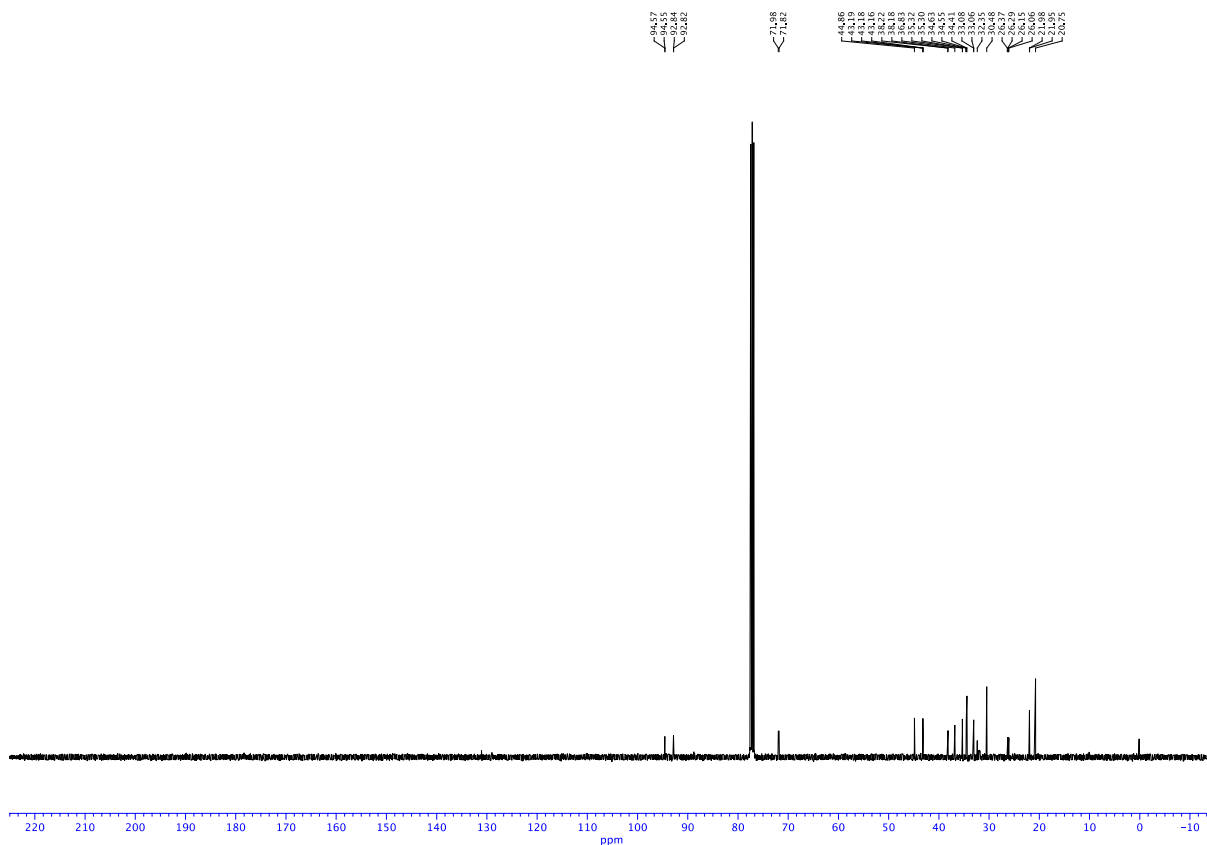

**Fig. S24.**  $^{13}\text{C}\{^1\text{H}\}$  NMR spectrum ( $\text{CDCl}_3$ , 100 MHz) of compound 7.



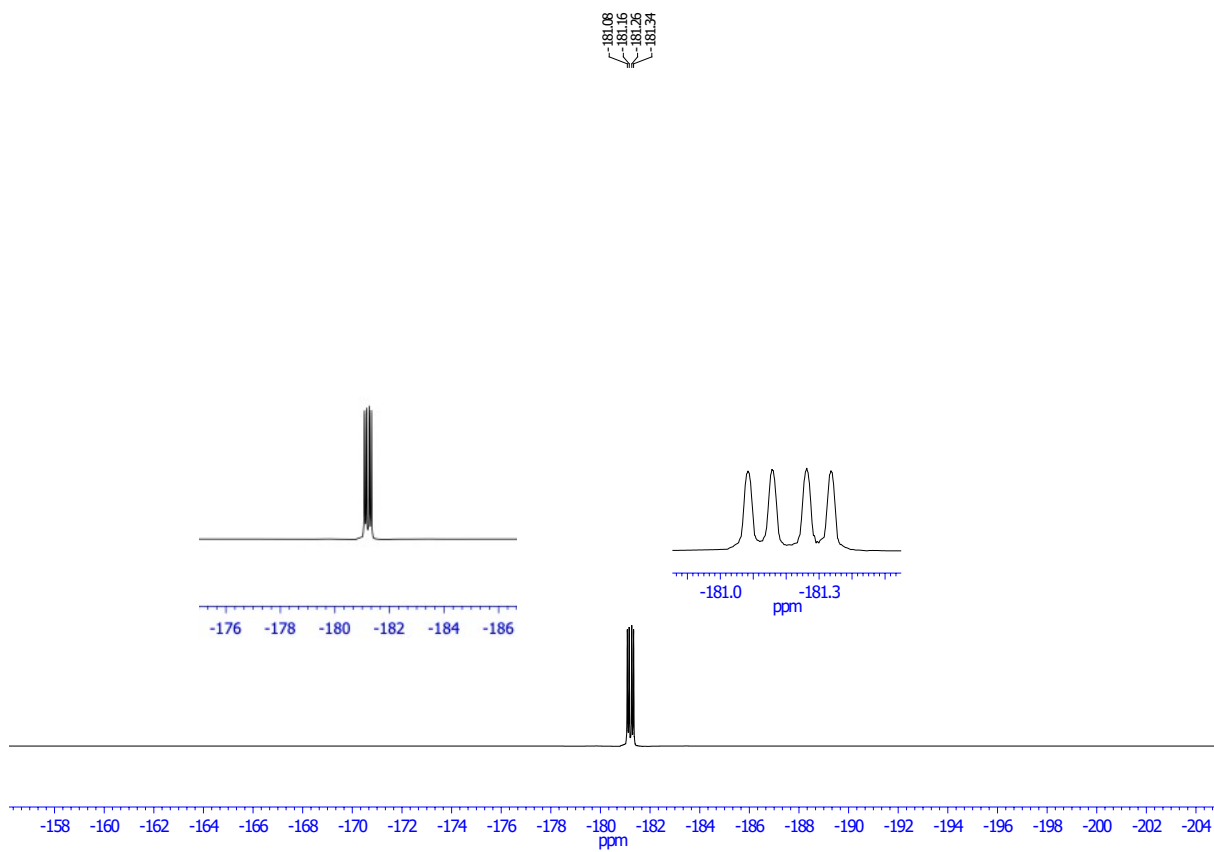

**Fig. S25.**  $^{19}\text{F}$  NMR spectrum ( $\text{CDCl}_3$ , 282 MHz) of compound **8**.

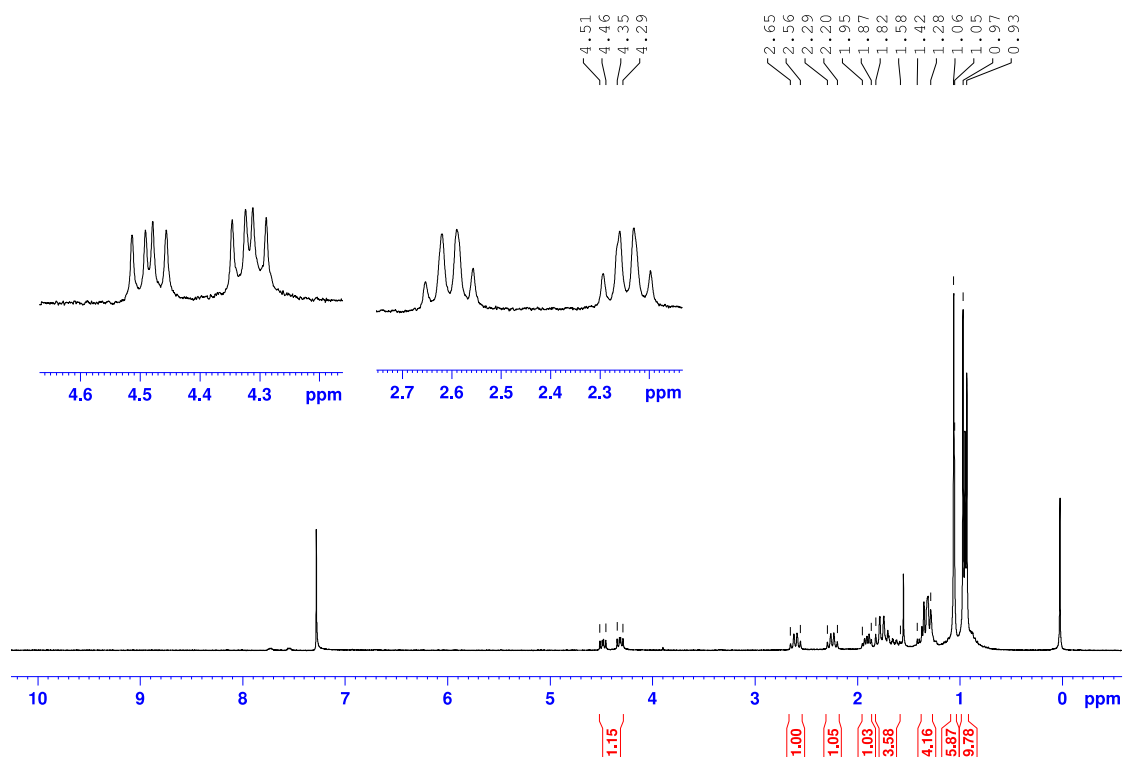

**Fig. S26.**  $^1\text{H}$  NMR spectrum ( $\text{CDCl}_3$ , 400 MHz) of compound **8**.

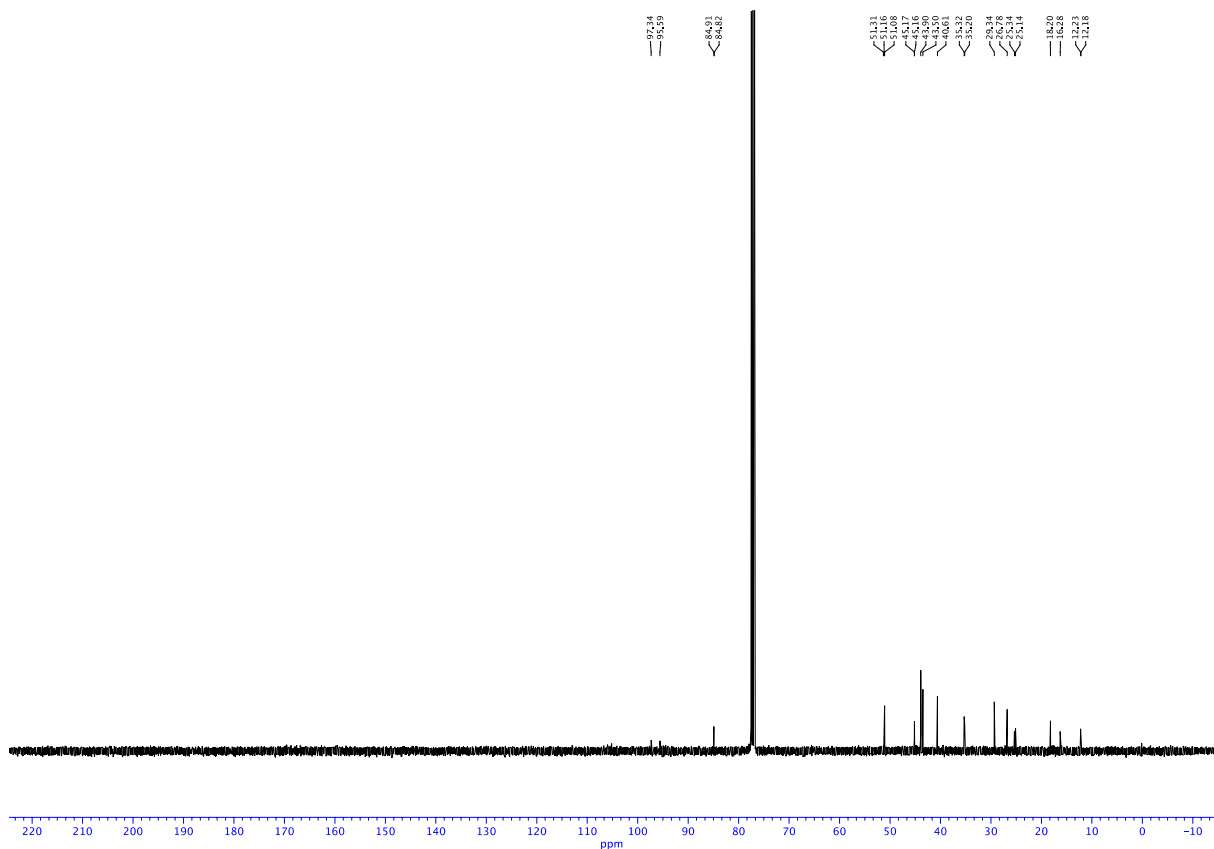

**Fig. S27.**  $^{13}\text{C}\{^1\text{H}\}$  NMR spectrum ( $\text{CDCl}_3$ , 100 MHz) of compound **8**.

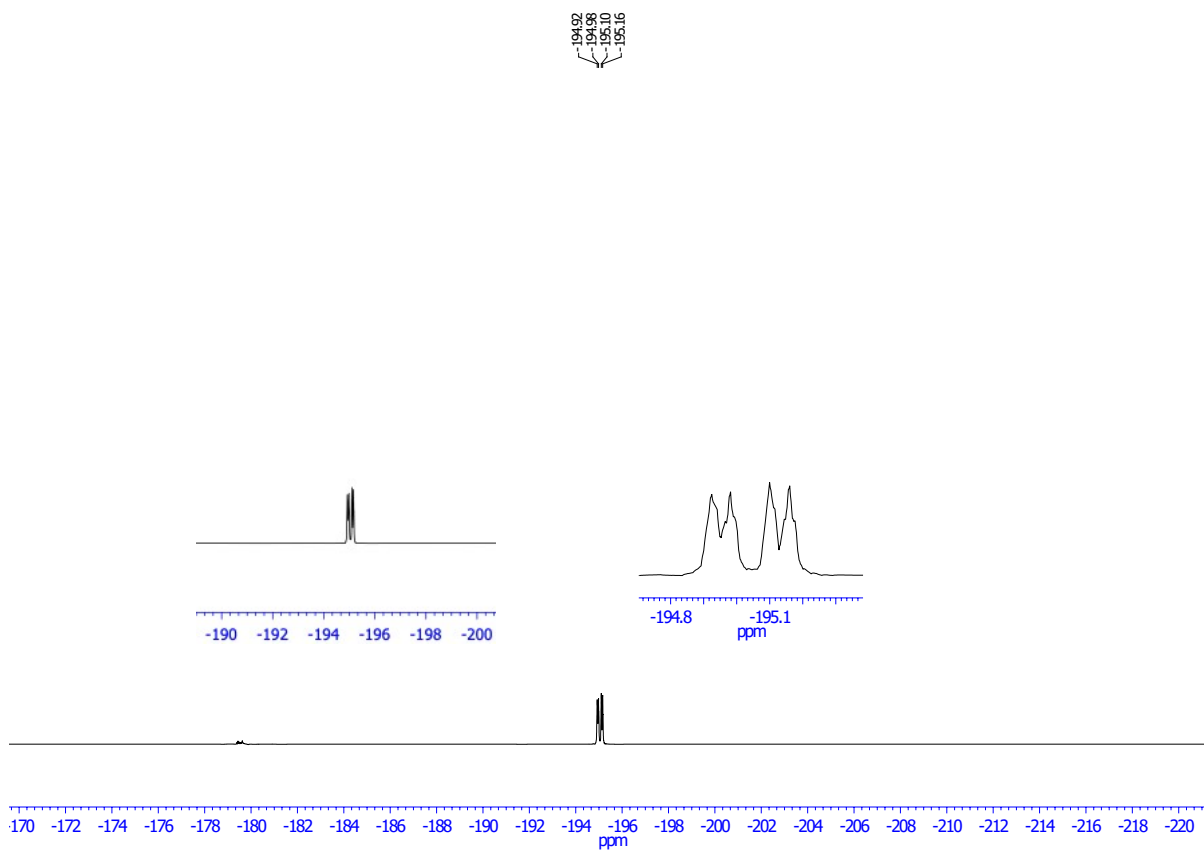

**Fig. S28.**  $^{19}\text{F}$  NMR spectrum ( $\text{CDCl}_3$ , 282 MHz) of compound **9**.

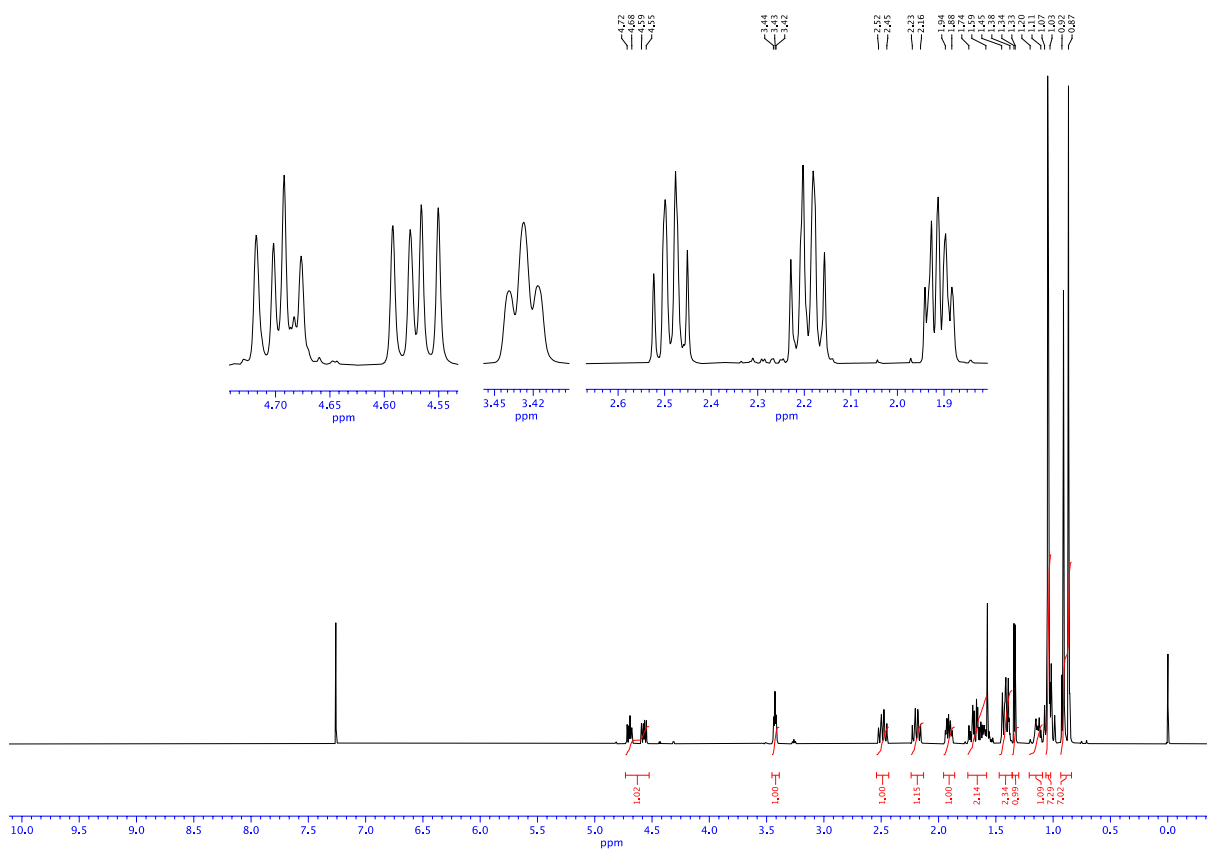

**Fig. S29.** <sup>1</sup>H NMR spectrum (CDCl<sub>3</sub>, 400 MHz) of compound **9**.

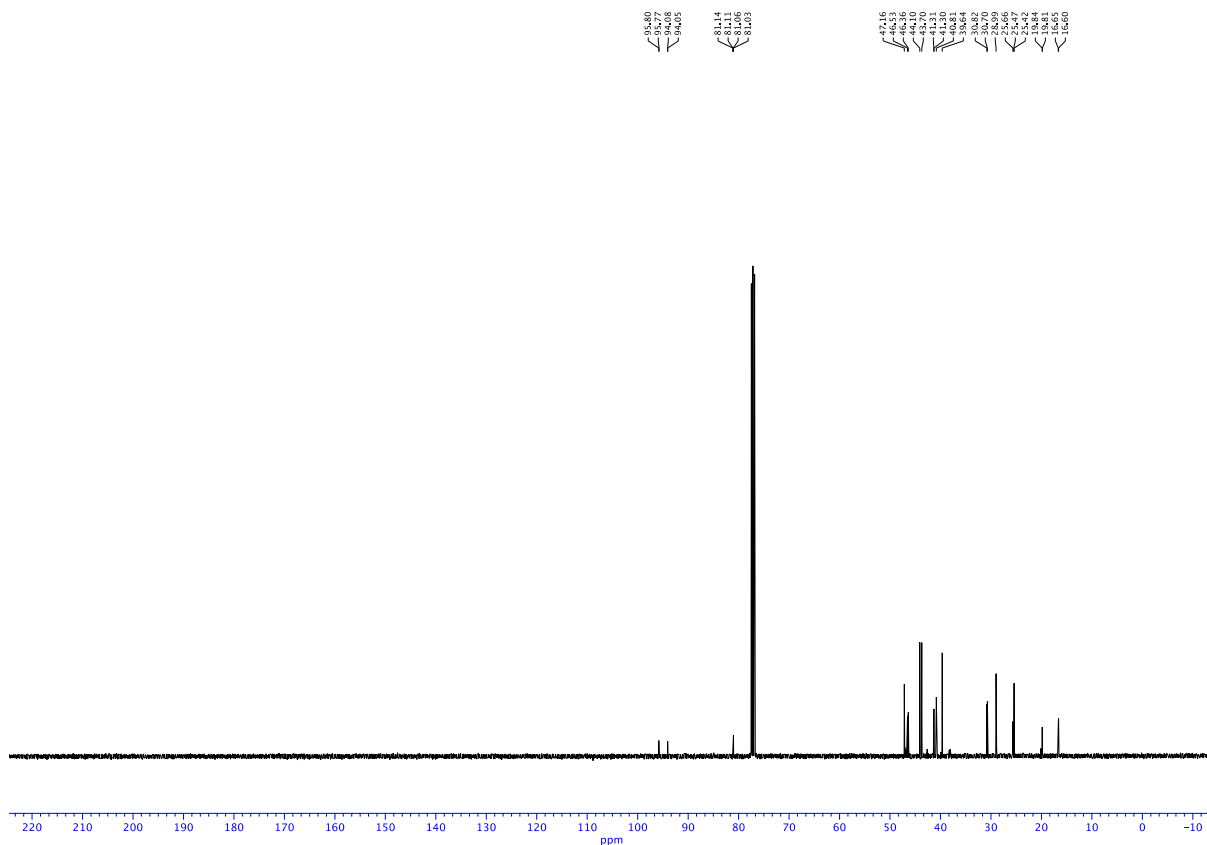

**Fig. S30.**  $^{13}\text{C}\{^1\text{H}\}$  NMR spectrum ( $\text{CDCl}_3$ , 100 MHz) of compound **9**.

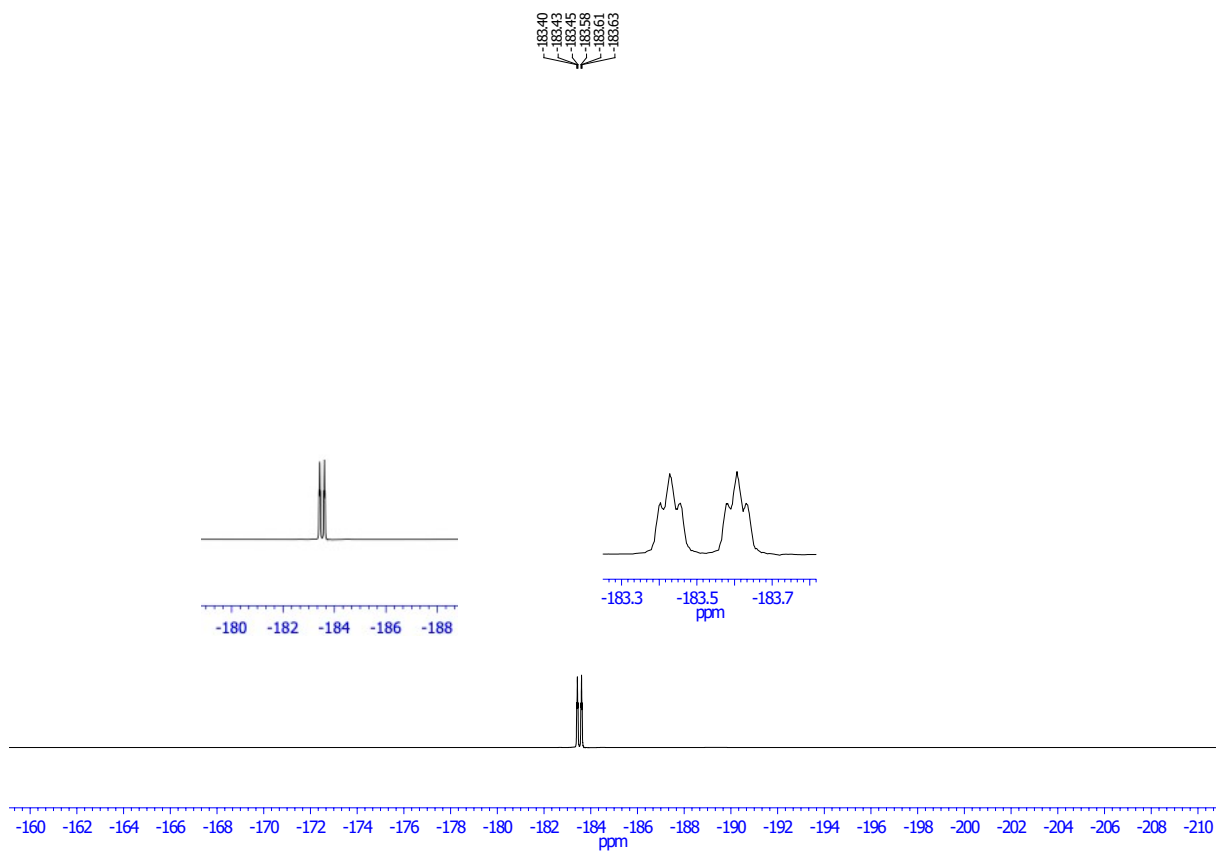

**Fig. S31.**  $^{19}\text{F}$  NMR spectrum ( $\text{CDCl}_3$ , 282 MHz) of compound **10**.

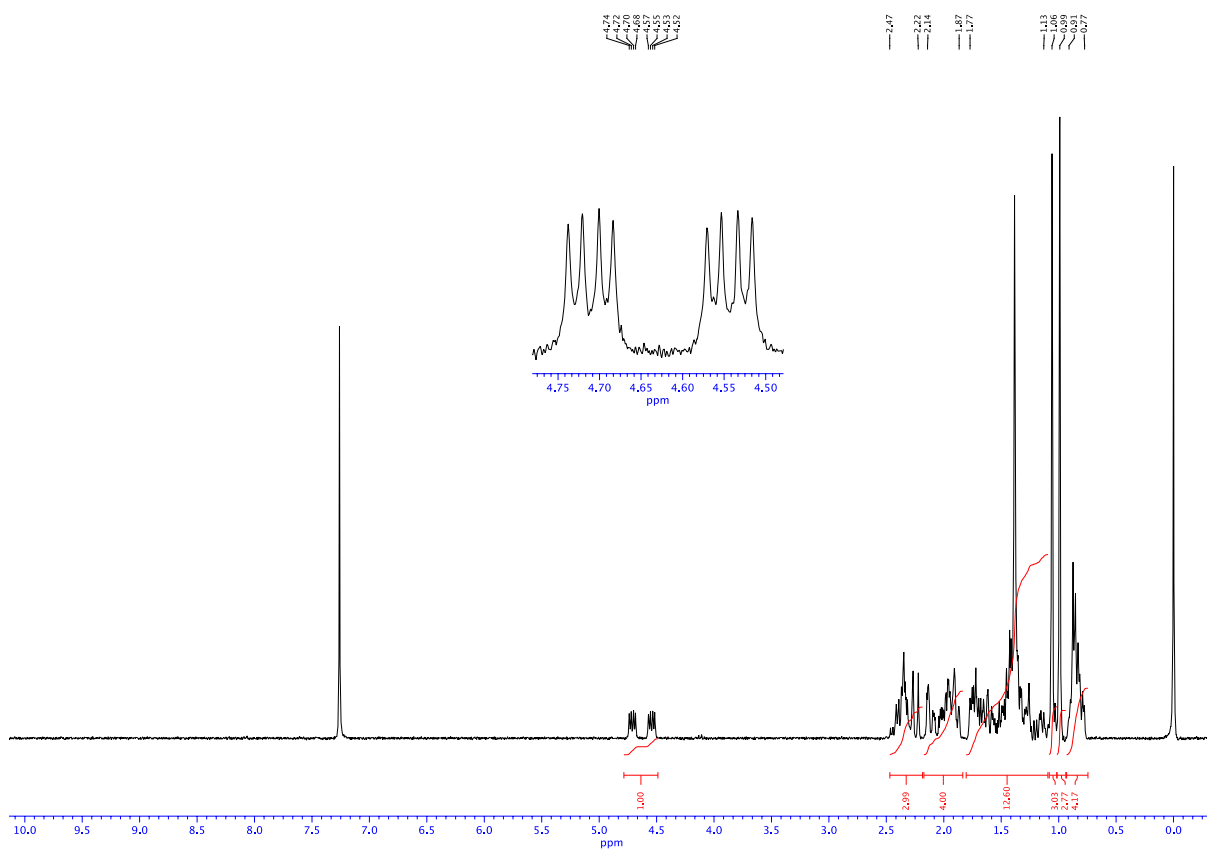

**Fig. S32.**  $^1\text{H}$  NMR spectrum ( $\text{CDCl}_3$ , 400 MHz) of compound **10**.



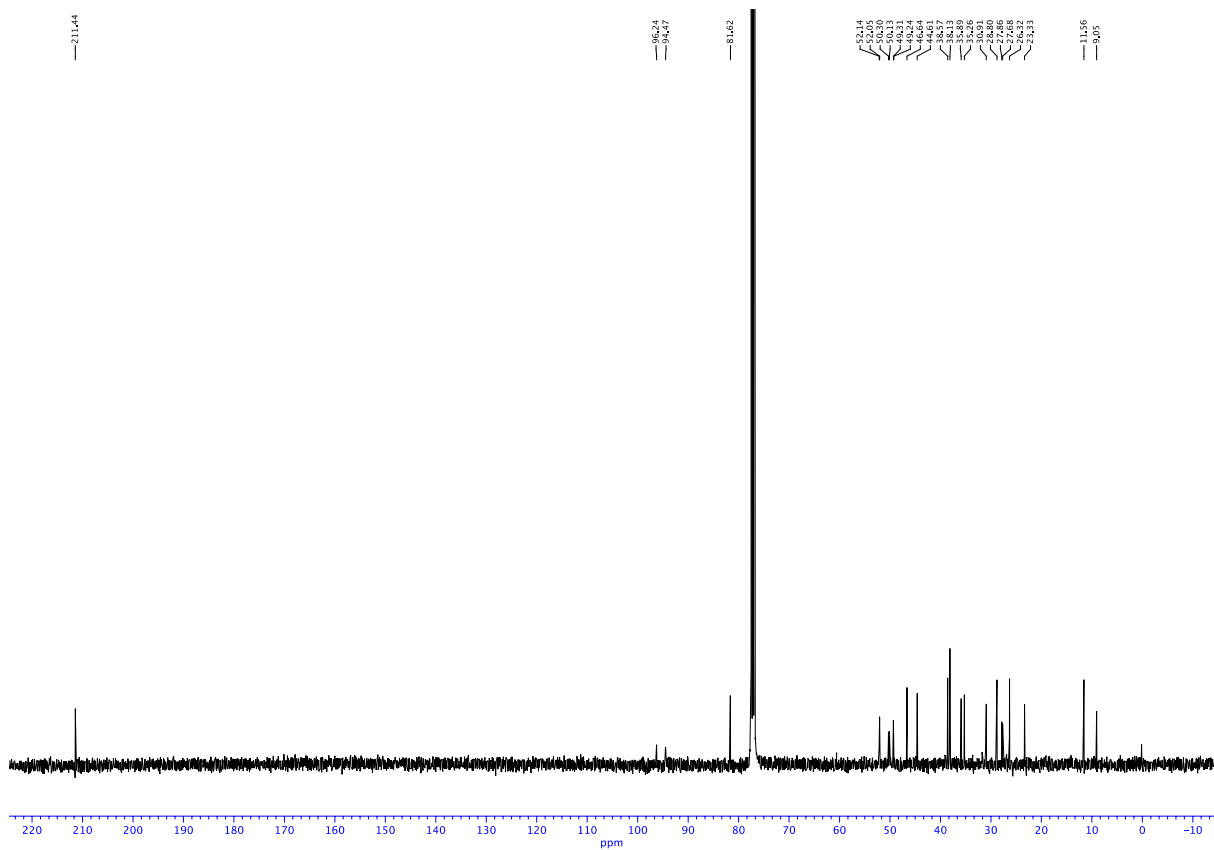

**Fig. S33.**  $^{13}\text{C}\{^1\text{H}\}$  NMR spectrum ( $\text{CDCl}_3$ , 100 MHz) of compound **10**.

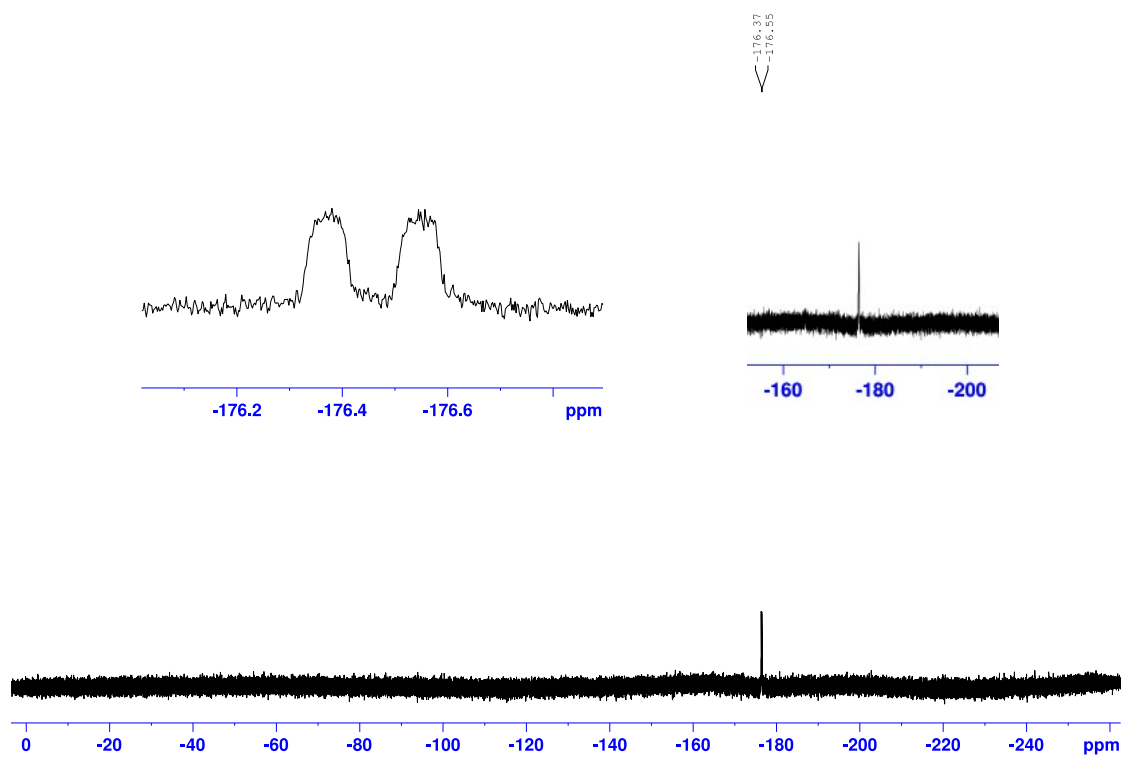

**Fig. S34.**  $^{19}\text{F}$  NMR spectrum ( $\text{CDCl}_3$ , 282 MHz) of compound 11.

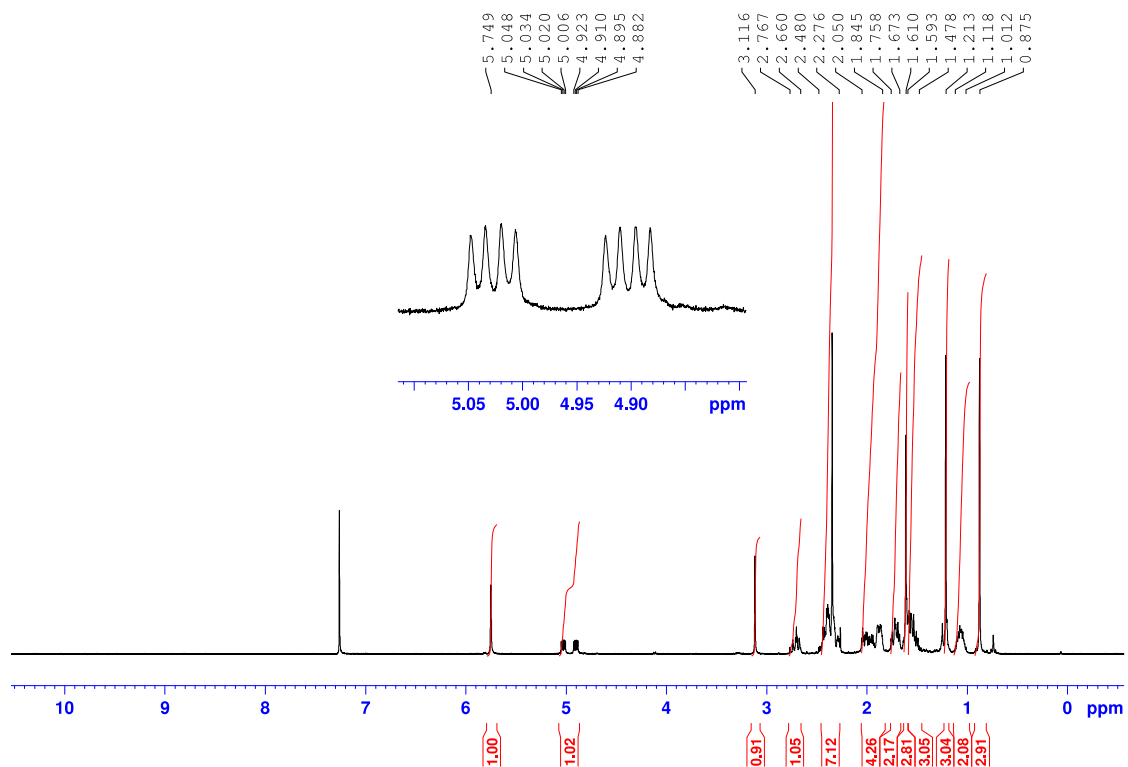

Fig. S35.  $^1\text{H}$  NMR spectrum ( $\text{CDCl}_3$ , 400 MHz) of compound 11.

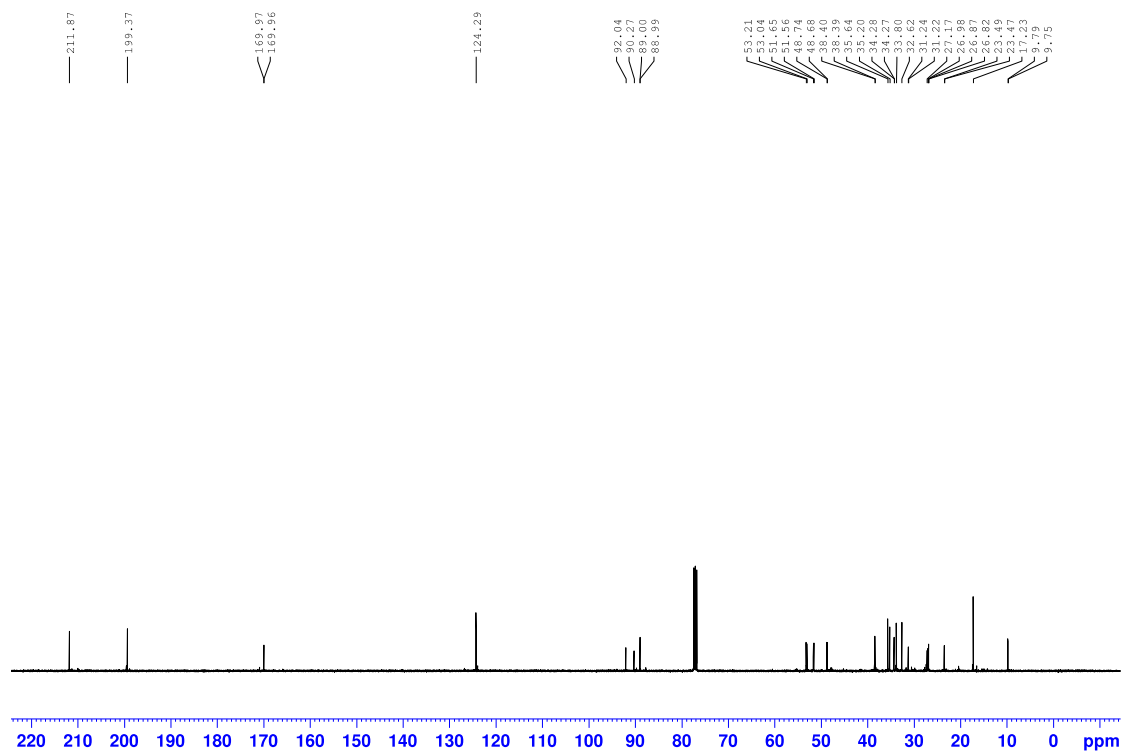

**Fig. S36.**  $^{13}\text{C}\{^1\text{H}\}$  NMR spectrum ( $\text{CDCl}_3$ , 100 MHz) of compound **11**.

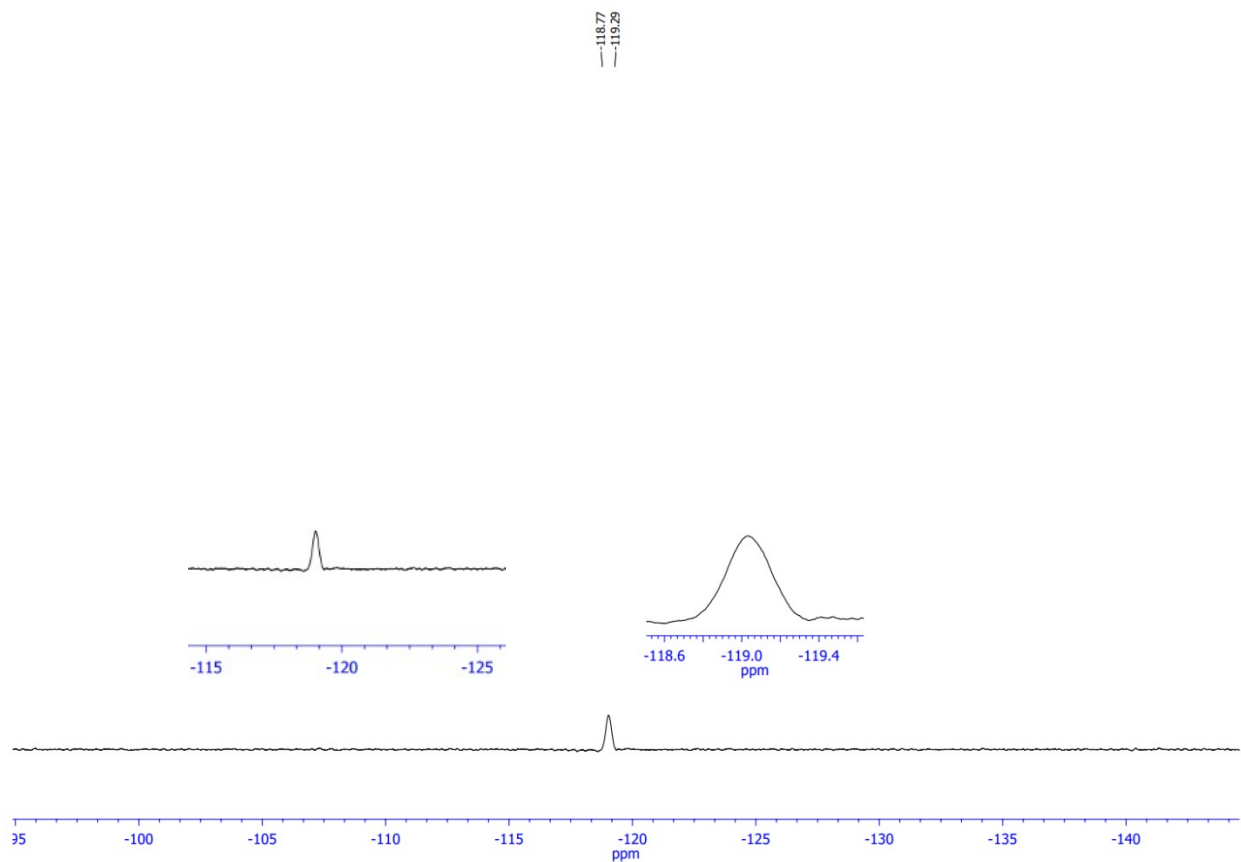

**Fig. S37.**  $^{19}\text{F}$  NMR spectrum ( $\text{CDCl}_3$ , 282 MHz) of compound **13**.

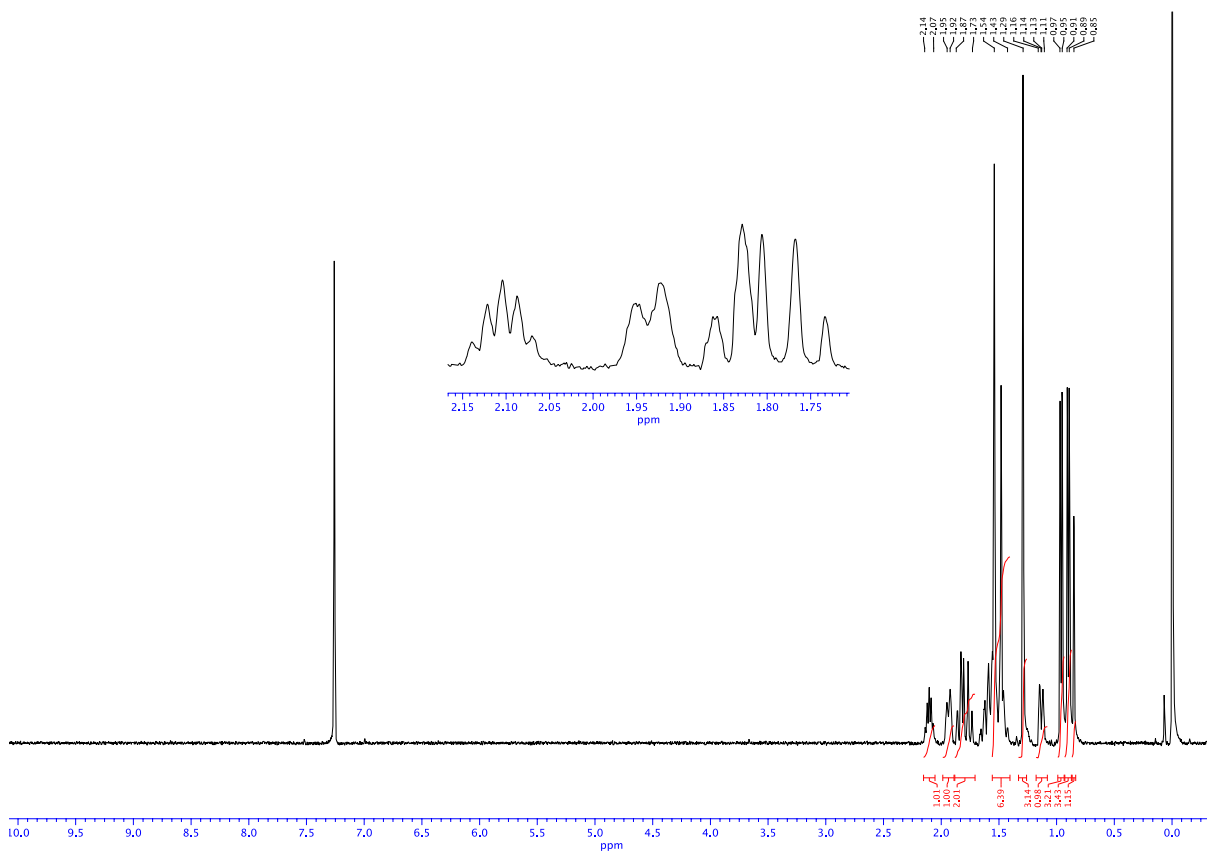

**Fig. S38.** <sup>1</sup>H NMR spectrum (CDCl<sub>3</sub>, 400 MHz) of compound **13**.

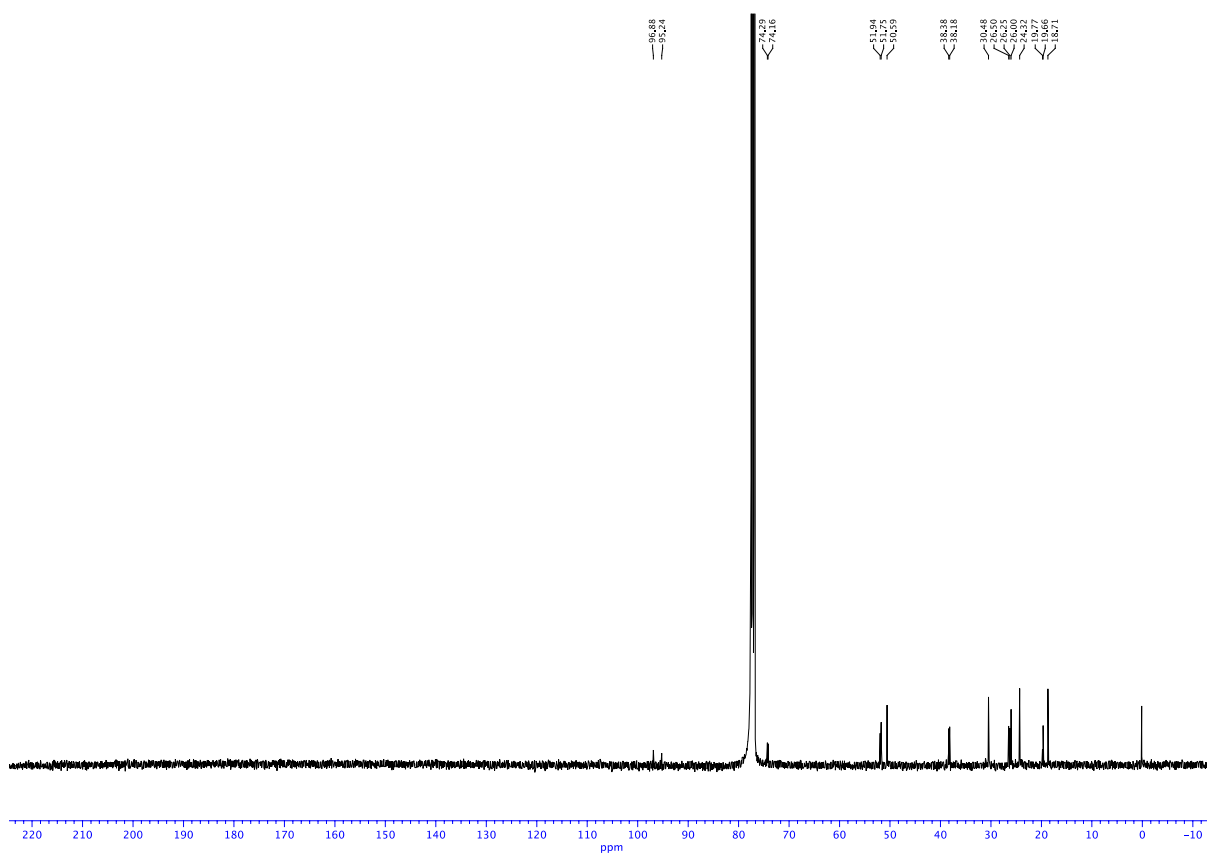

**Fig. S39.**  $^{13}\text{C}\{^1\text{H}\}$  NMR spectrum (CDCl<sub>3</sub>, 100 MHz) of compound **13**.

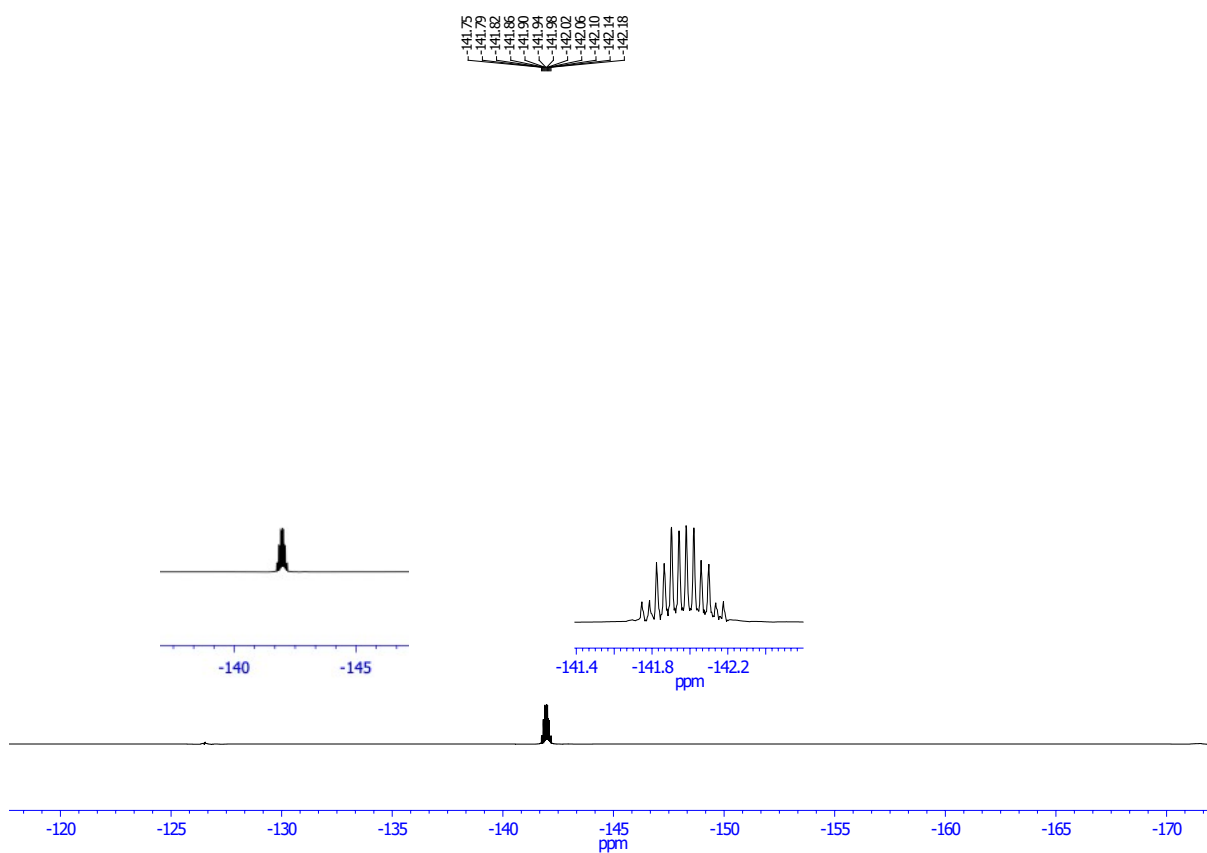

**Fig. S40.**  $^{19}\text{F}$  NMR spectrum ( $\text{CDCl}_3$ , 282 MHz) of compound **14**.



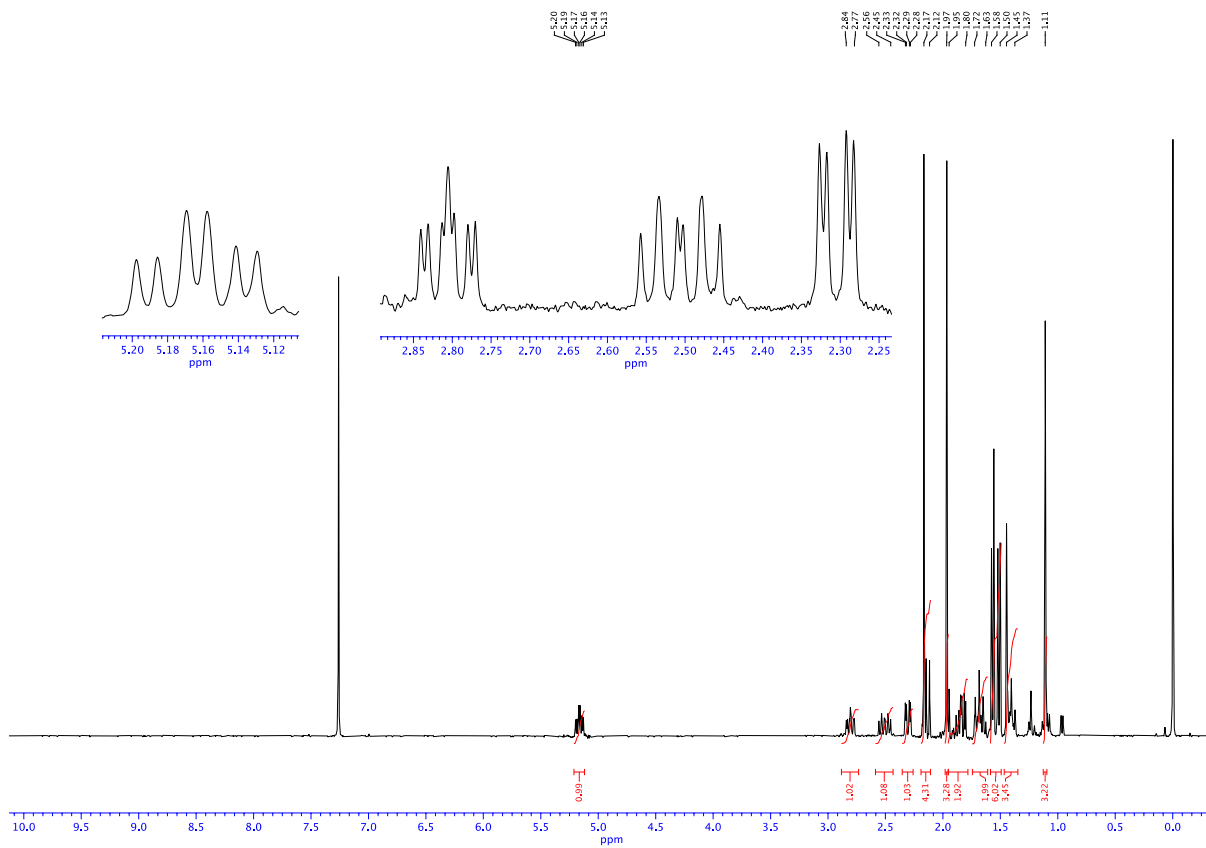

**Fig. S41.**  $^1\text{H}$  NMR spectrum ( $\text{CDCl}_3$ , 400 MHz) of compound **14**.

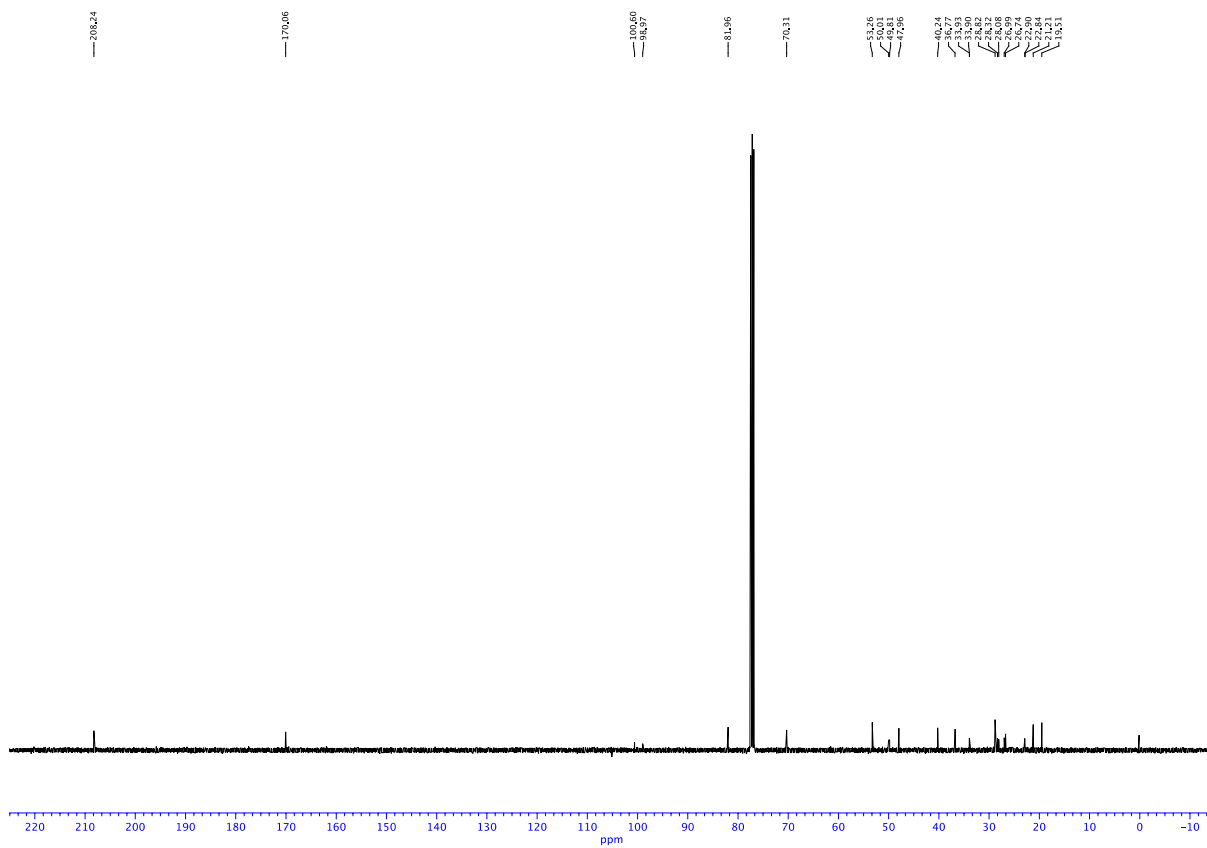

**Fig. S42.**  $^{13}\text{C}\{^1\text{H}\}$  NMR spectrum ( $\text{CDCl}_3$ , 100 MHz) of compound **14**.

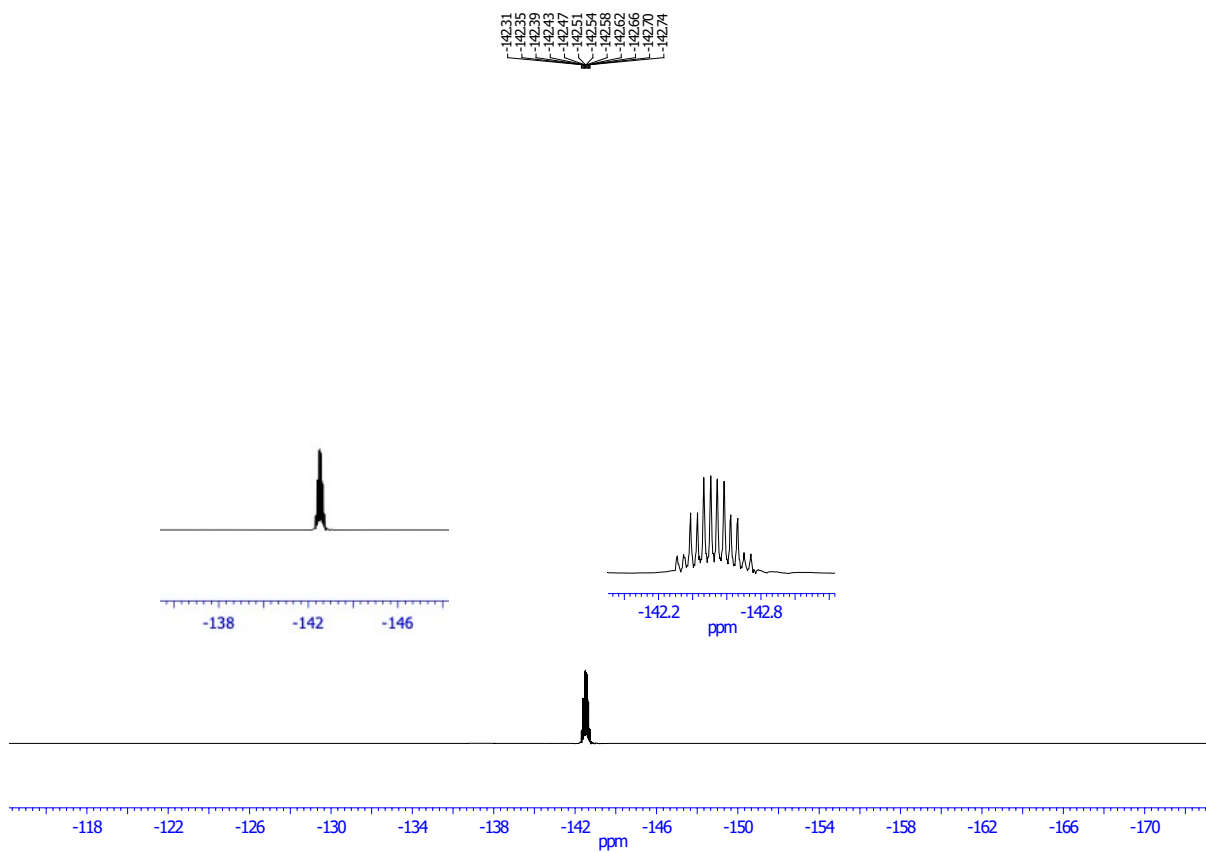

**Fig. S43.**  $^{19}\text{F}$  NMR spectrum ( $\text{CDCl}_3$ , 282 MHz) of compound **15**.

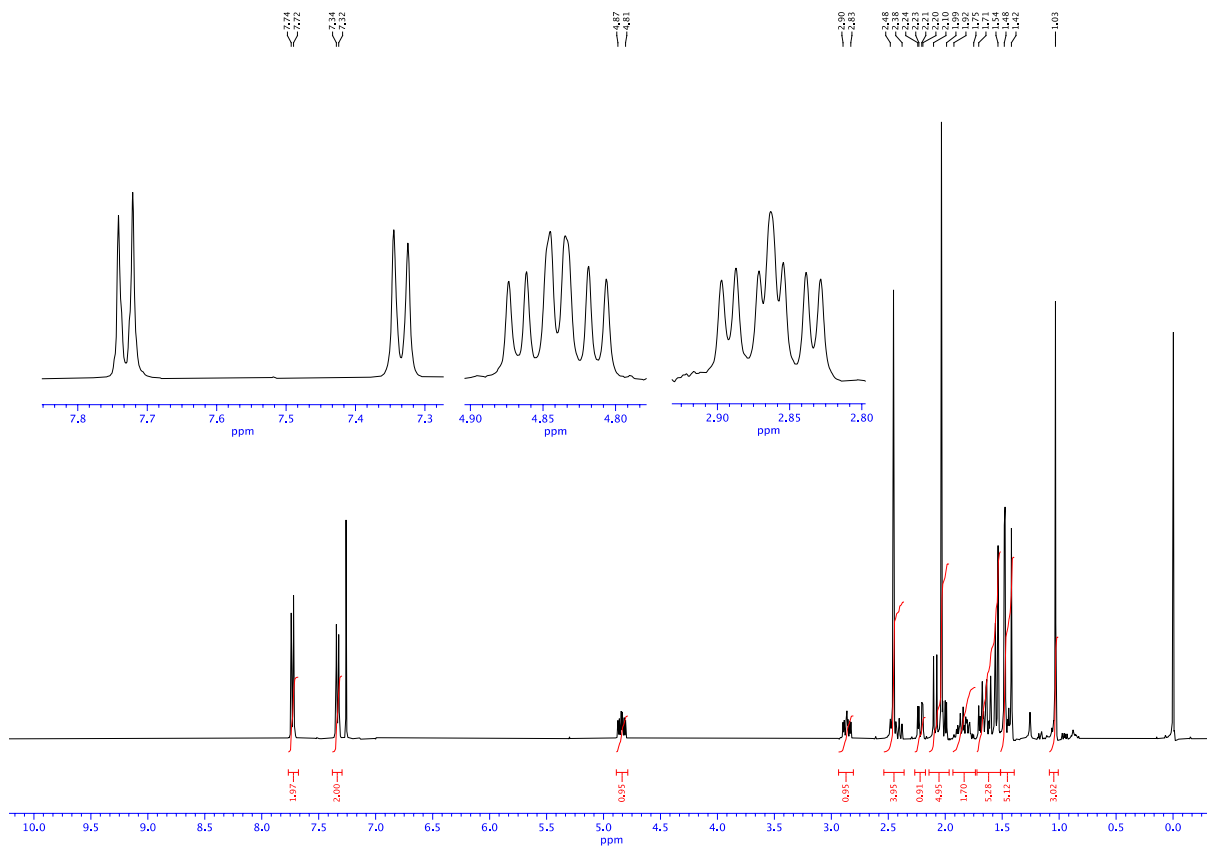

**Fig. S44.**  $^1\text{H}$  NMR spectrum ( $\text{CDCl}_3$ , 400 MHz) of compound **15**.

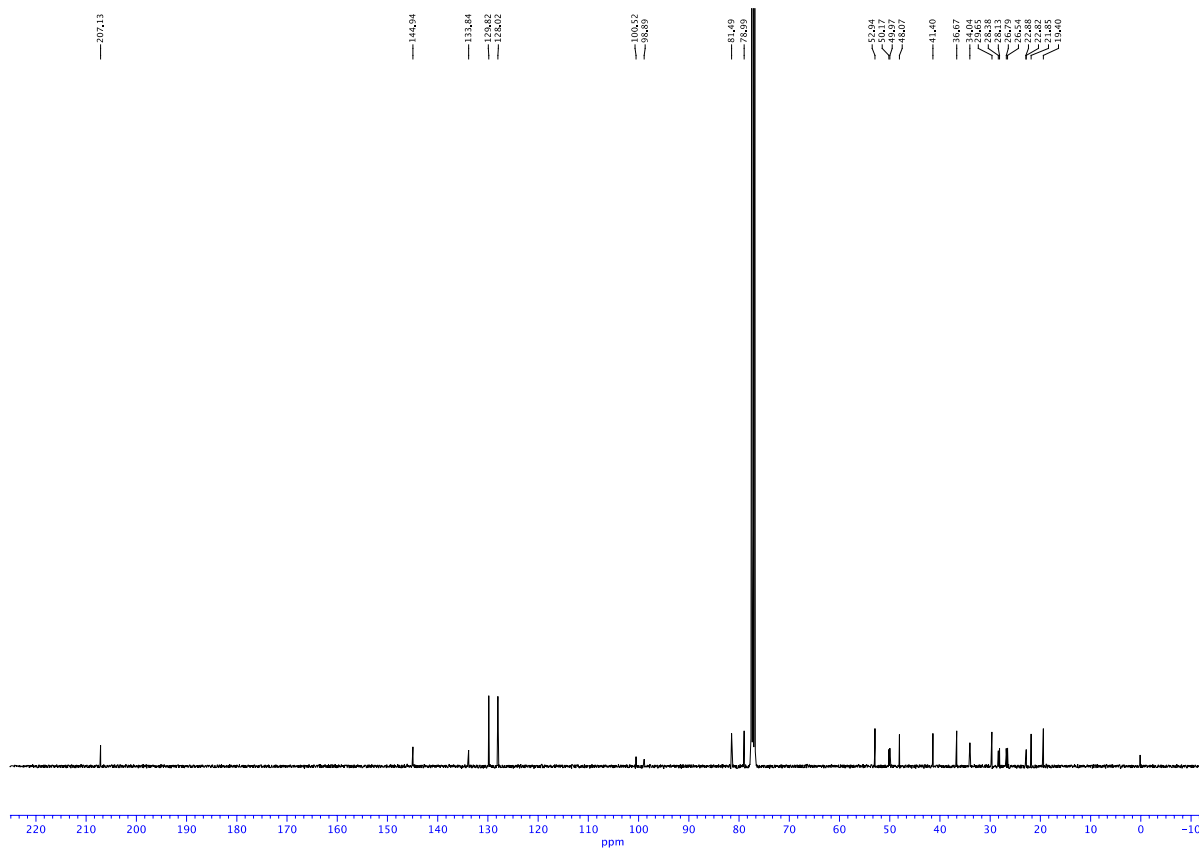

**Fig. S45.**  $^{13}\text{C}\{^1\text{H}\}$  NMR spectrum ( $\text{CDCl}_3$ , 100 MHz) of compound **15**.

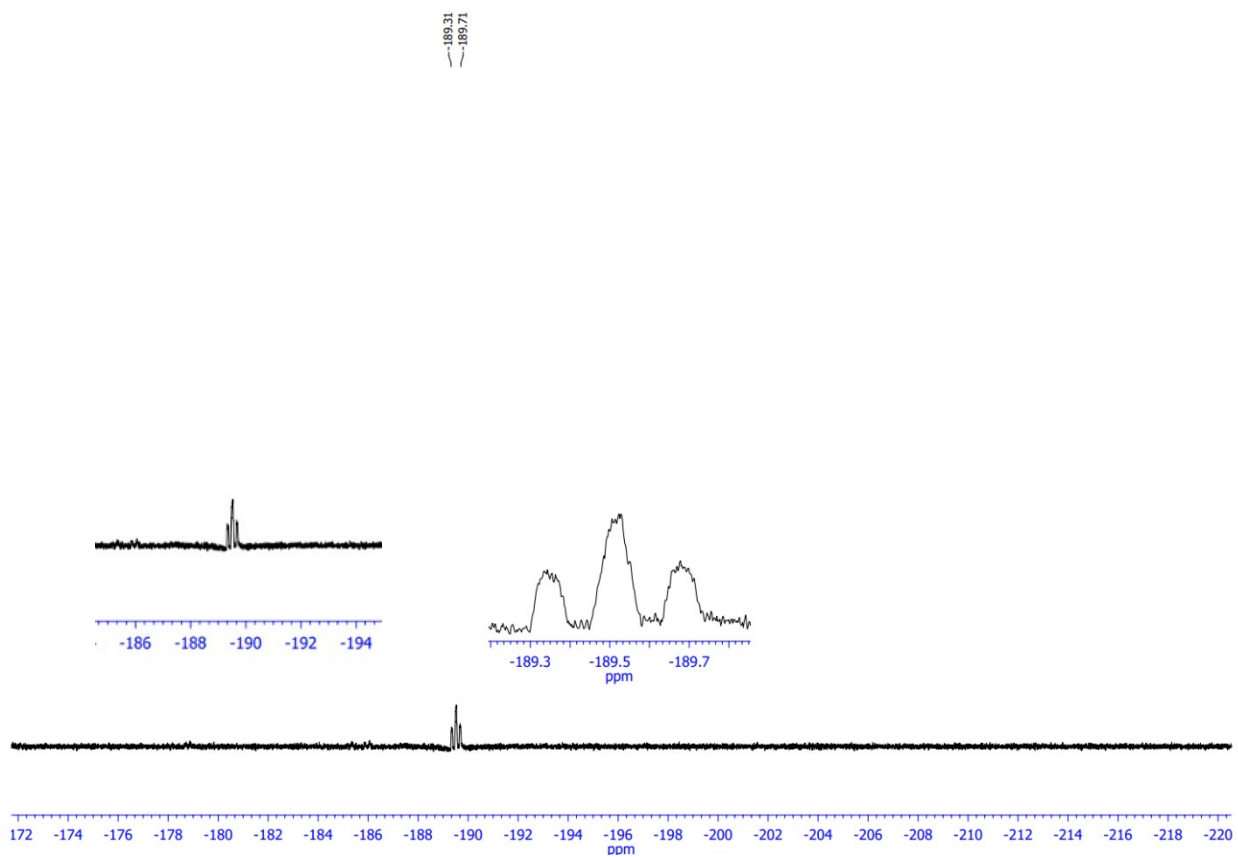

**Fig. S46.**  $^{19}\text{F}$  NMR spectrum ( $\text{CDCl}_3$ , 282 MHz) of compound **16**.

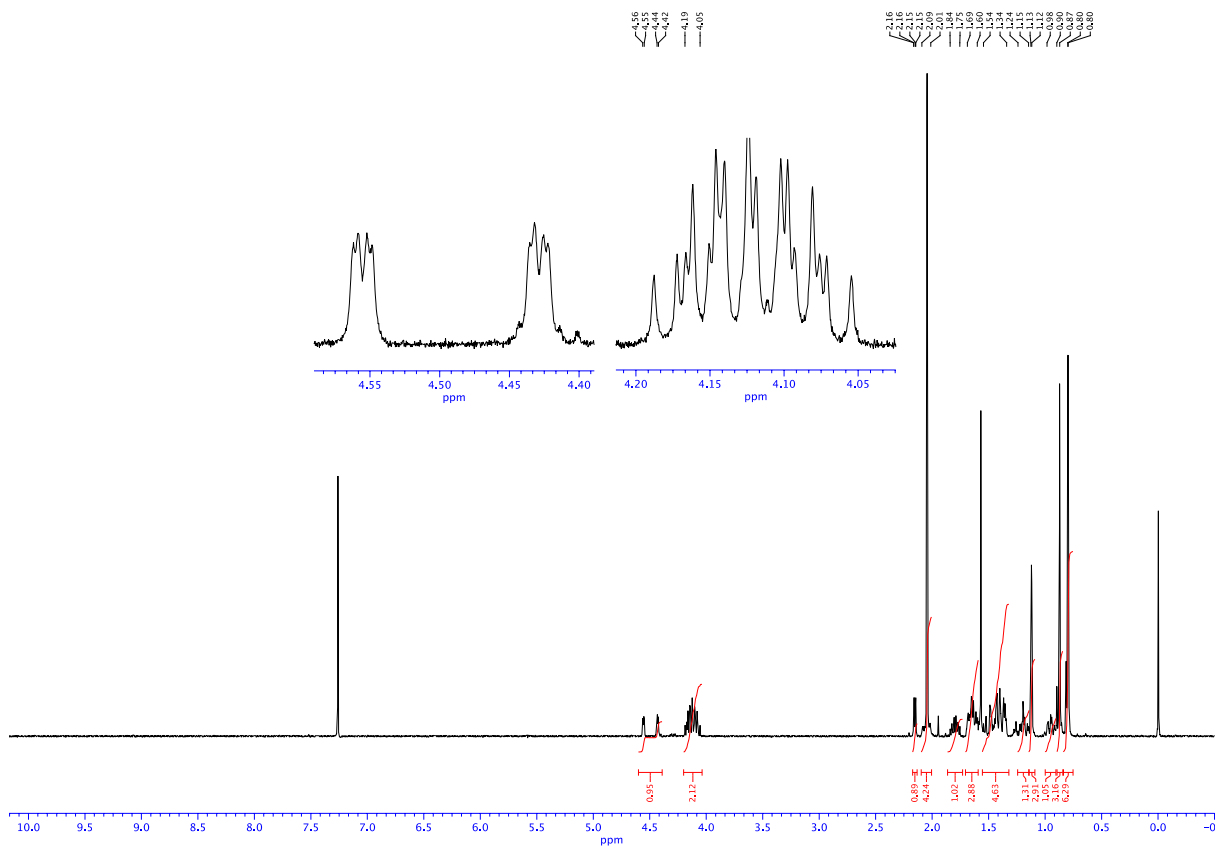

**Fig. S47.**  $^1\text{H}$  NMR spectrum ( $\text{CDCl}_3$ , 400 MHz) of compound 16.

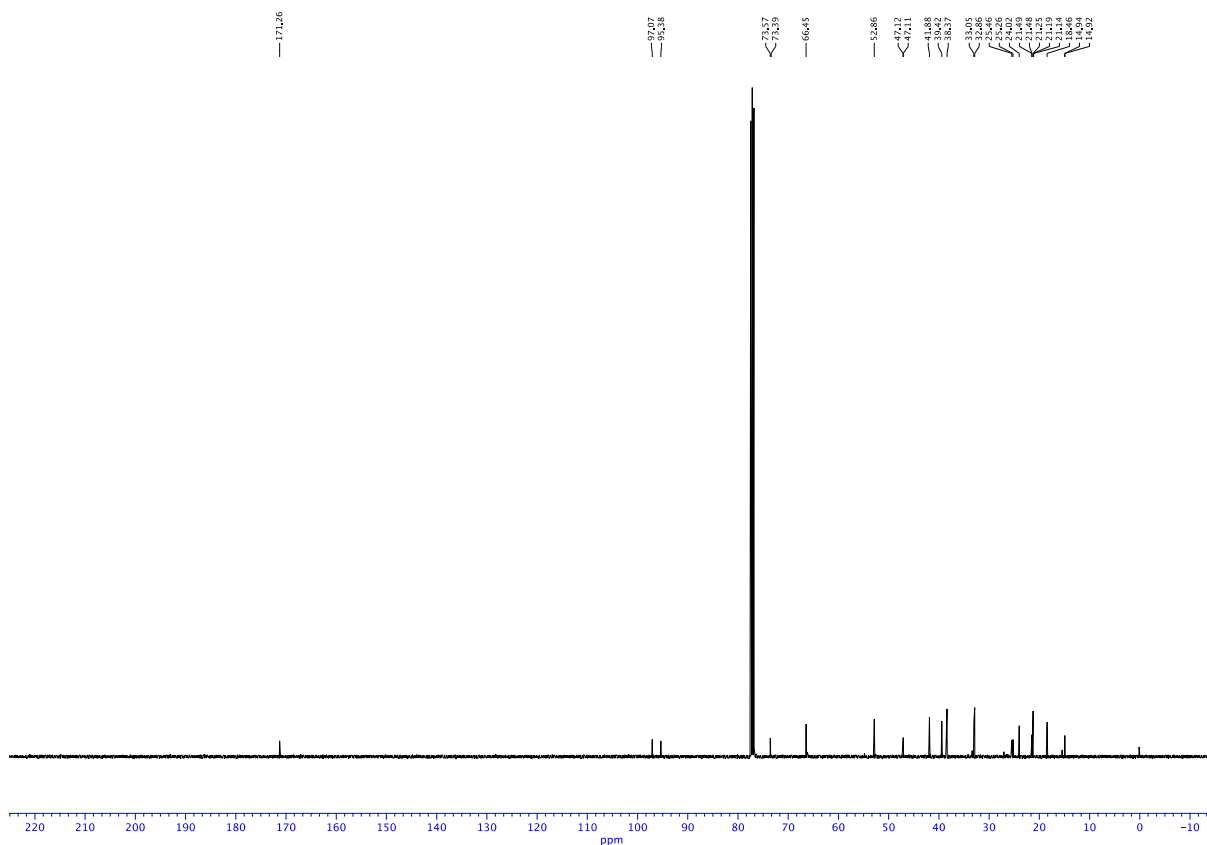

**Fig. S48.**  $^{13}\text{C}\{^1\text{H}\}$  NMR spectrum ( $\text{CDCl}_3$ , 100 MHz) of compound **16**.



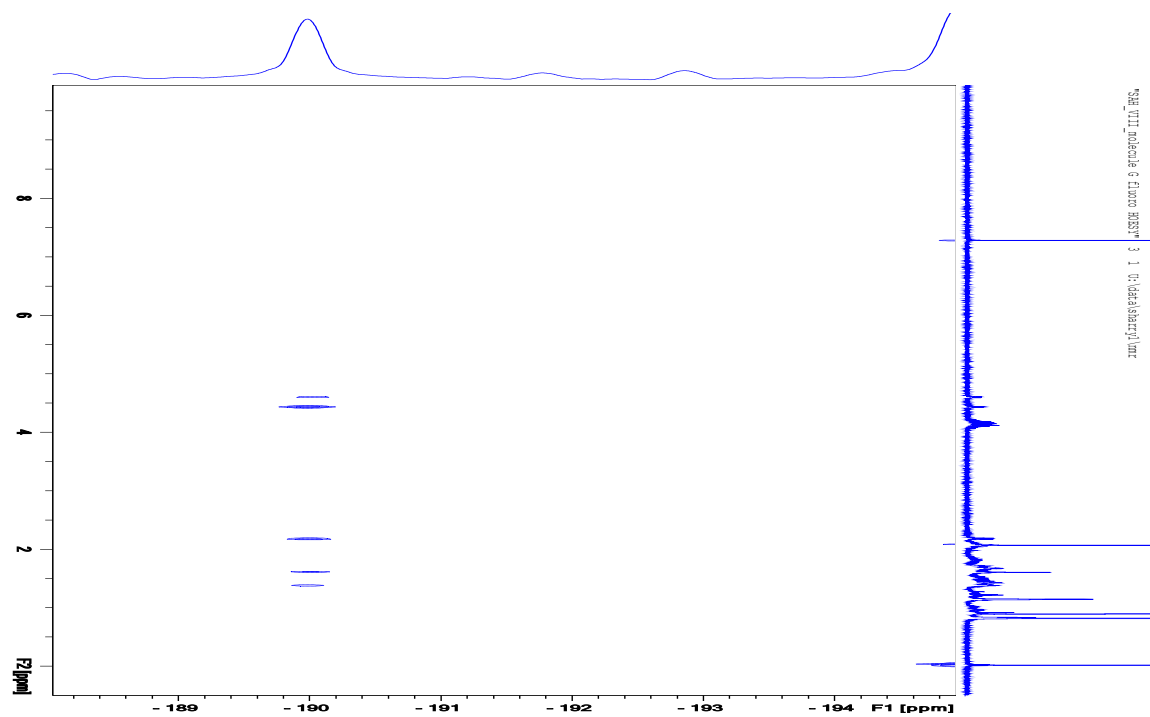

**Fig. S49.** HOESY spectrum (CDCl<sub>3</sub>, 300 MHz) of compound 16.

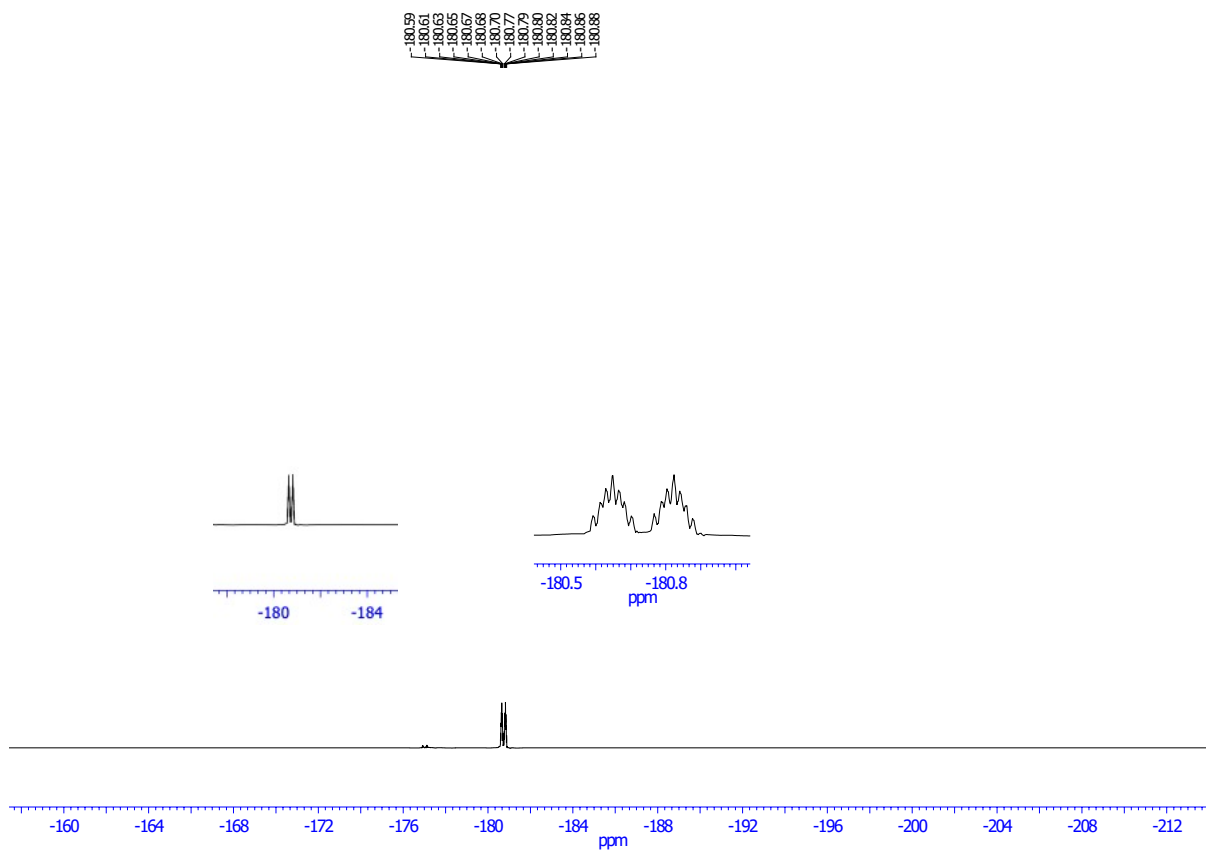

**Fig. S50.**  $^{19}\text{F}$  NMR spectrum ( $\text{CDCl}_3$ , 282 MHz) of compound **17**.

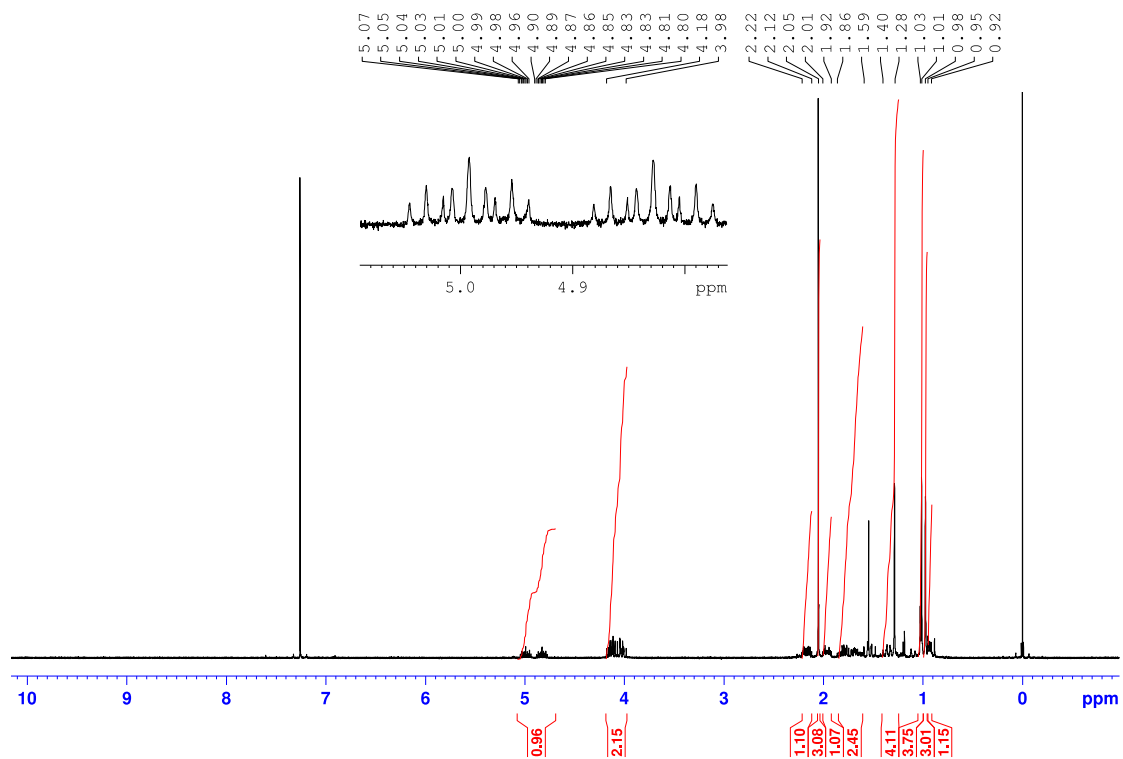

**Fig. S51.**  $^1\text{H}$  NMR spectrum ( $\text{CDCl}_3$ , 400 MHz) of compound **17**.

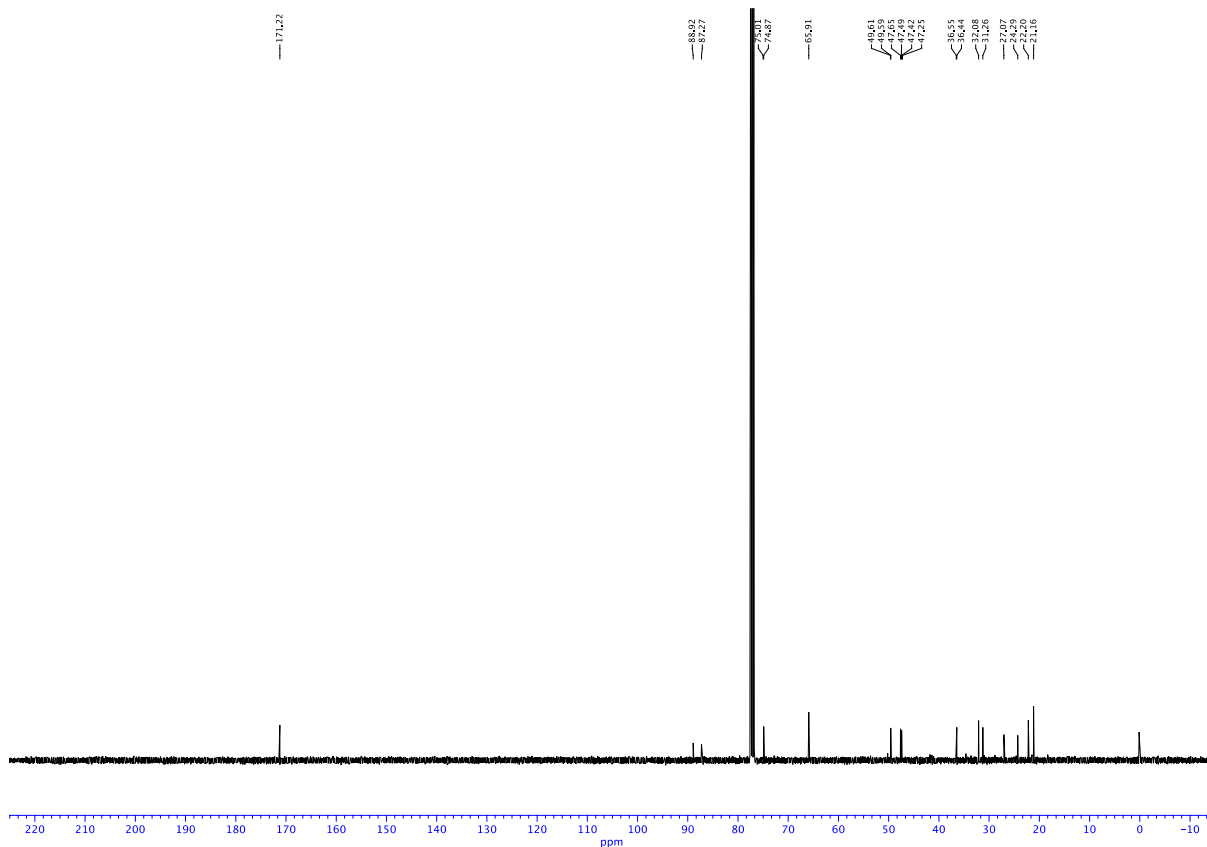

**Fig. S52.**  $^{13}\text{C}\{^1\text{H}\}$  NMR spectrum ( $\text{CDCl}_3$ , 100 MHz) of compound **17**.

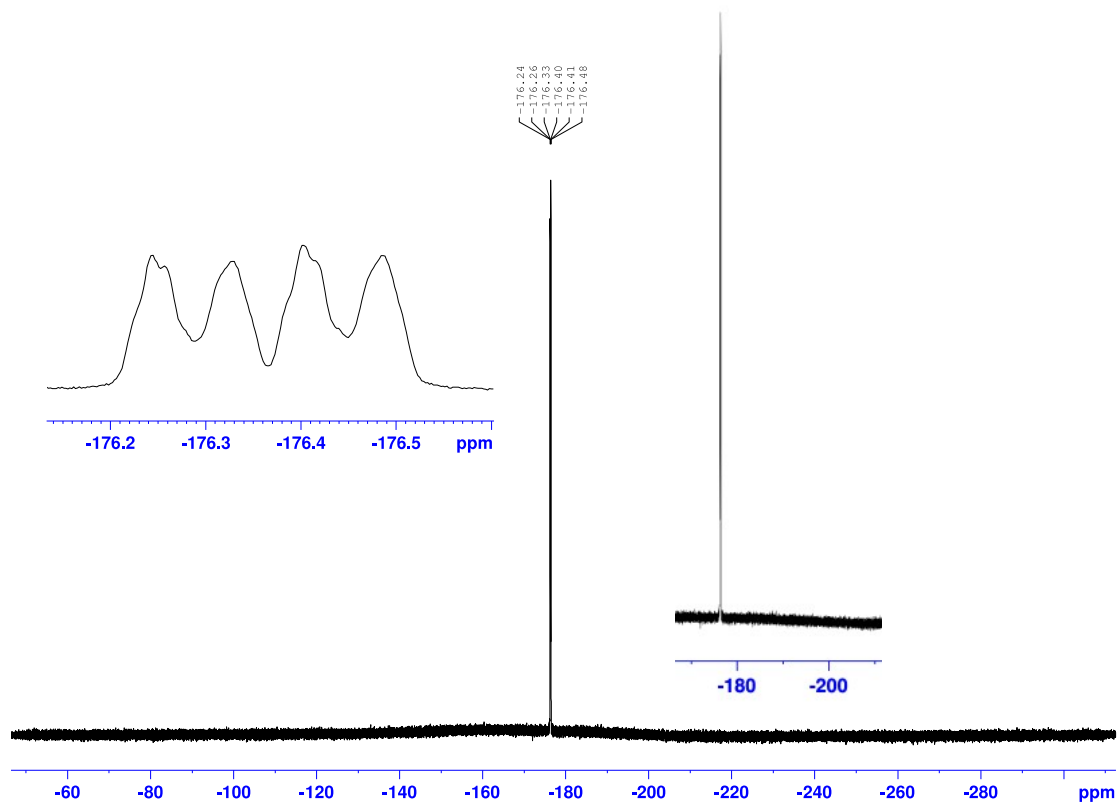

**Fig. S53.**  $^{19}\text{F}$  NMR spectrum ( $\text{CDCl}_3$ , 282 MHz) of compound **18**.

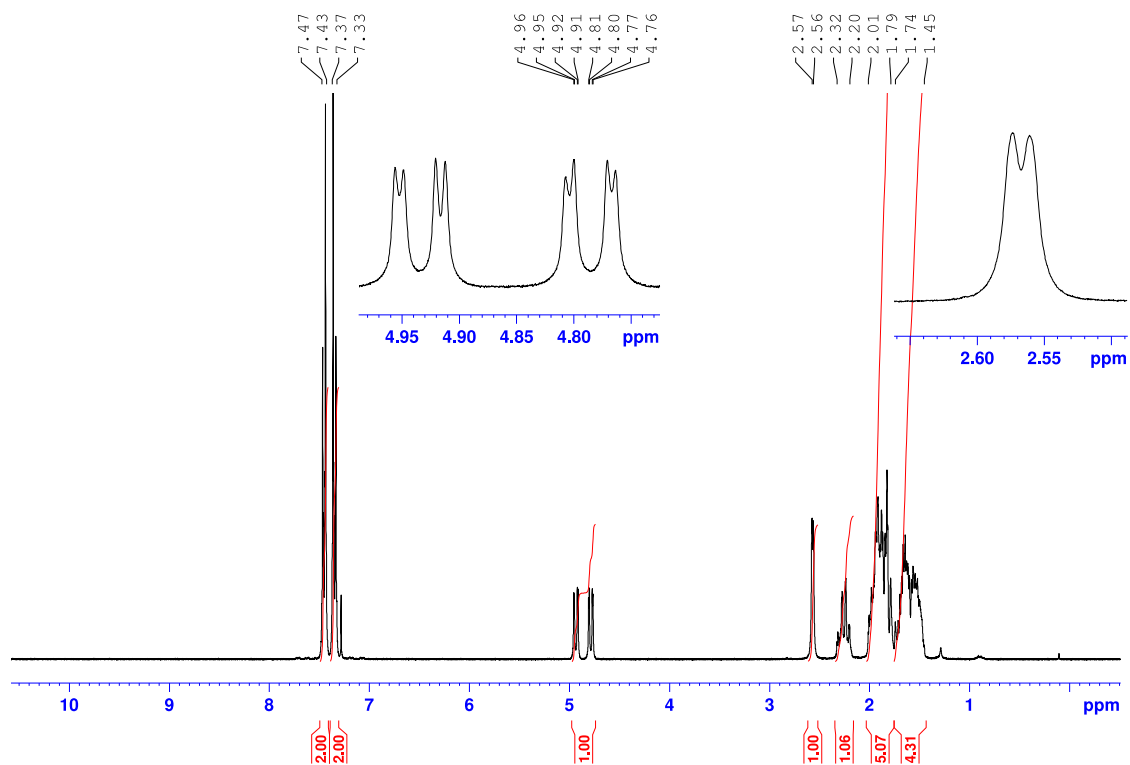

**Fig. S54.**  $^1\text{H}$  NMR spectrum ( $\text{CDCl}_3$ , 400 MHz) of compound **18**.

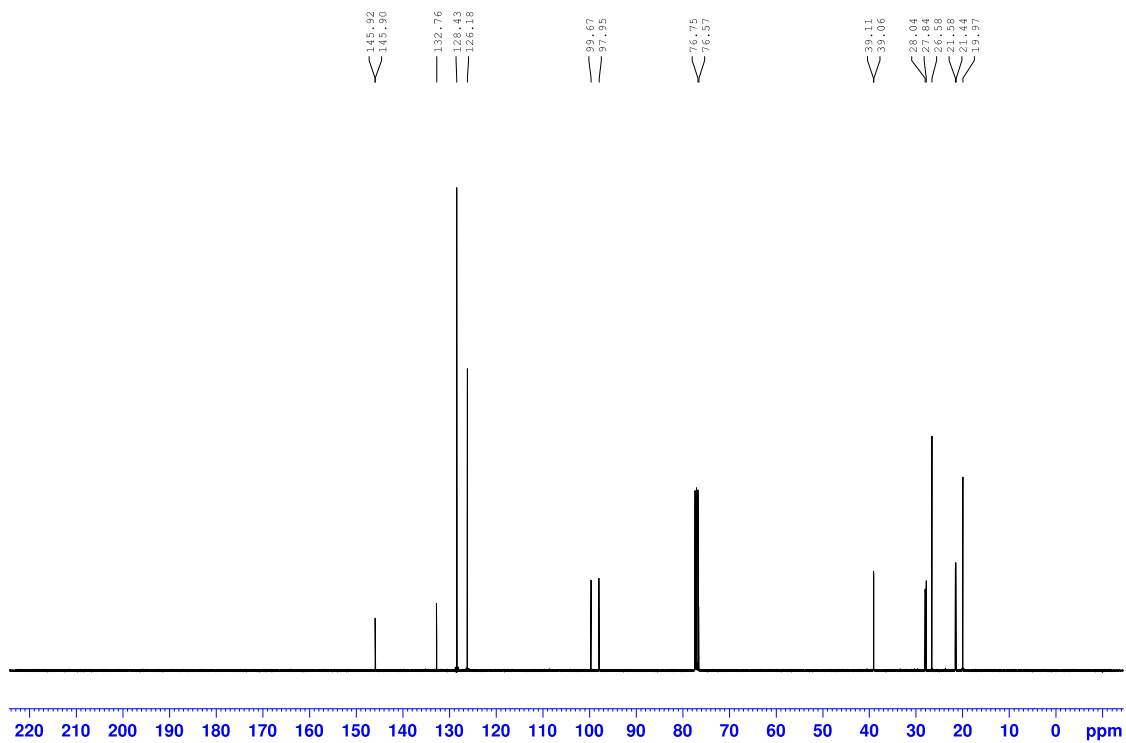

**Fig. S55.**  $^{13}\text{C}\{^1\text{H}\}$  NMR spectrum ( $\text{CDCl}_3$ , 100 MHz) of compound **18**.

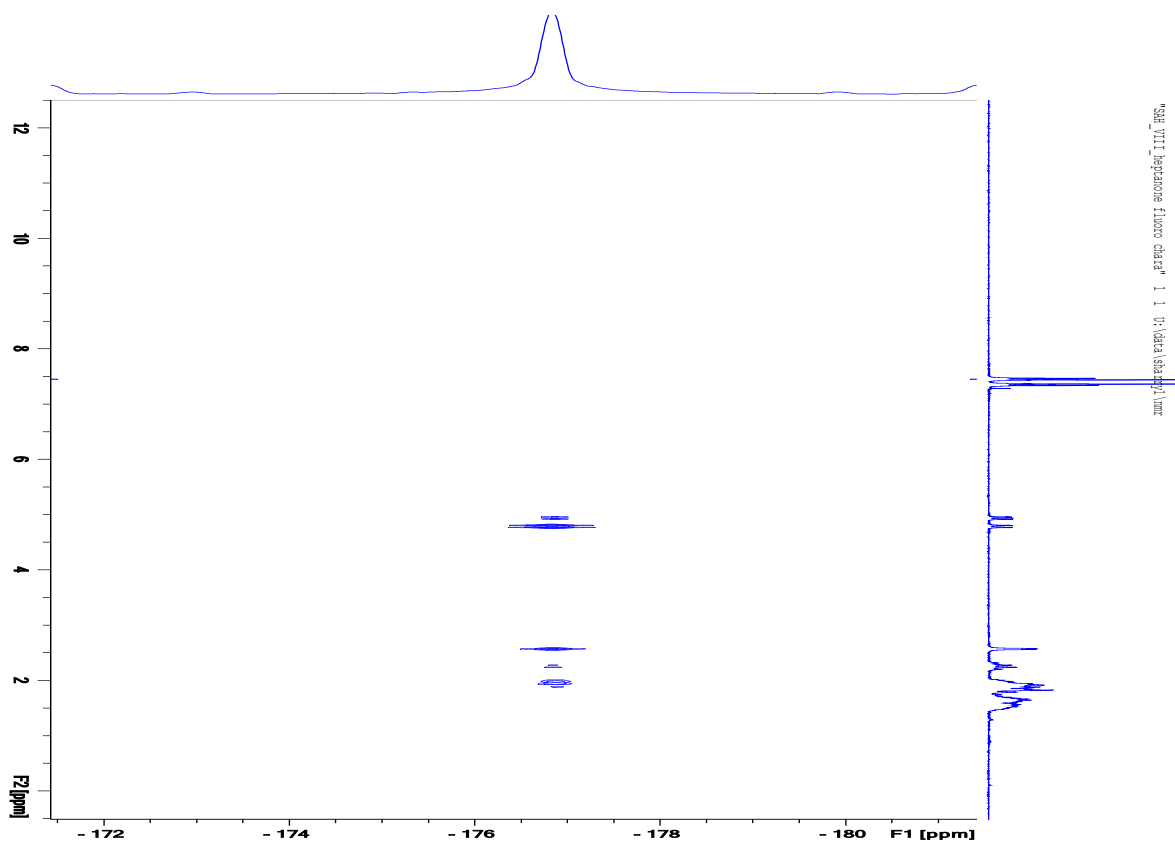

**Fig. S56.** HOESY (CDCl<sub>3</sub>, 300 MHz) of compound **18**.



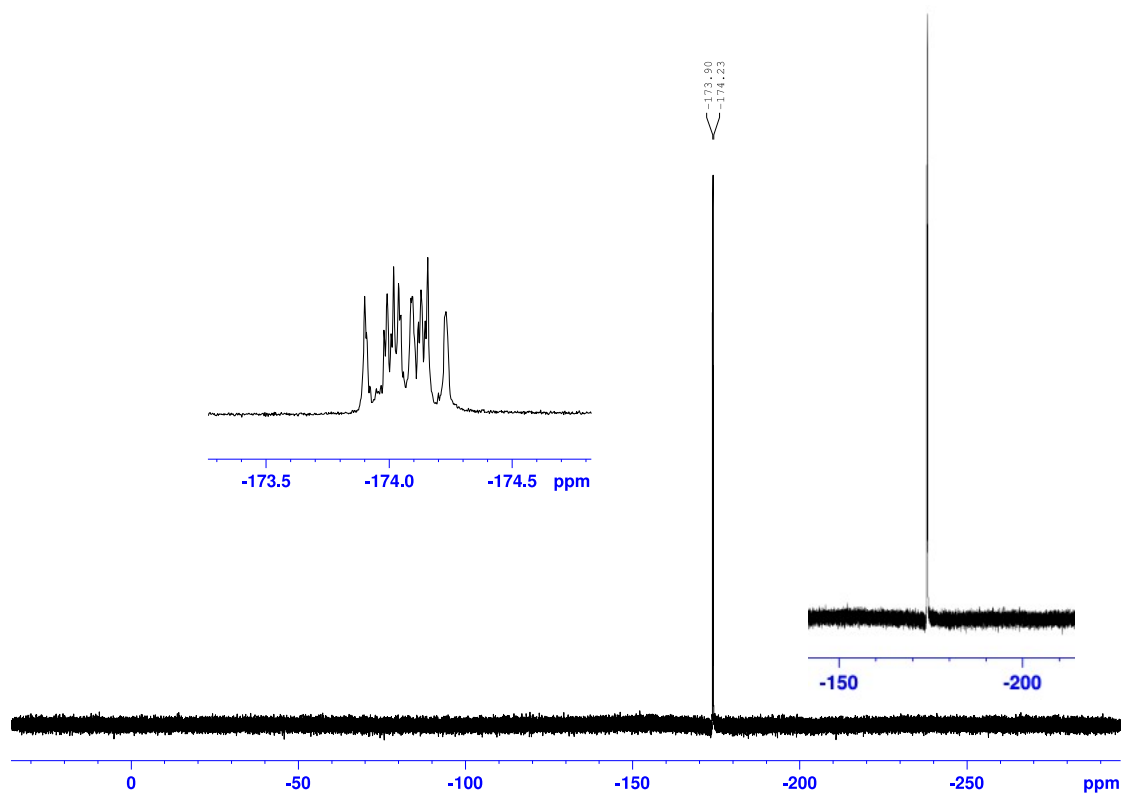

**Fig. S57.**  $^{19}\text{F}$  NMR spectrum ( $\text{CDCl}_3$ , 282 MHz) of compound 19.

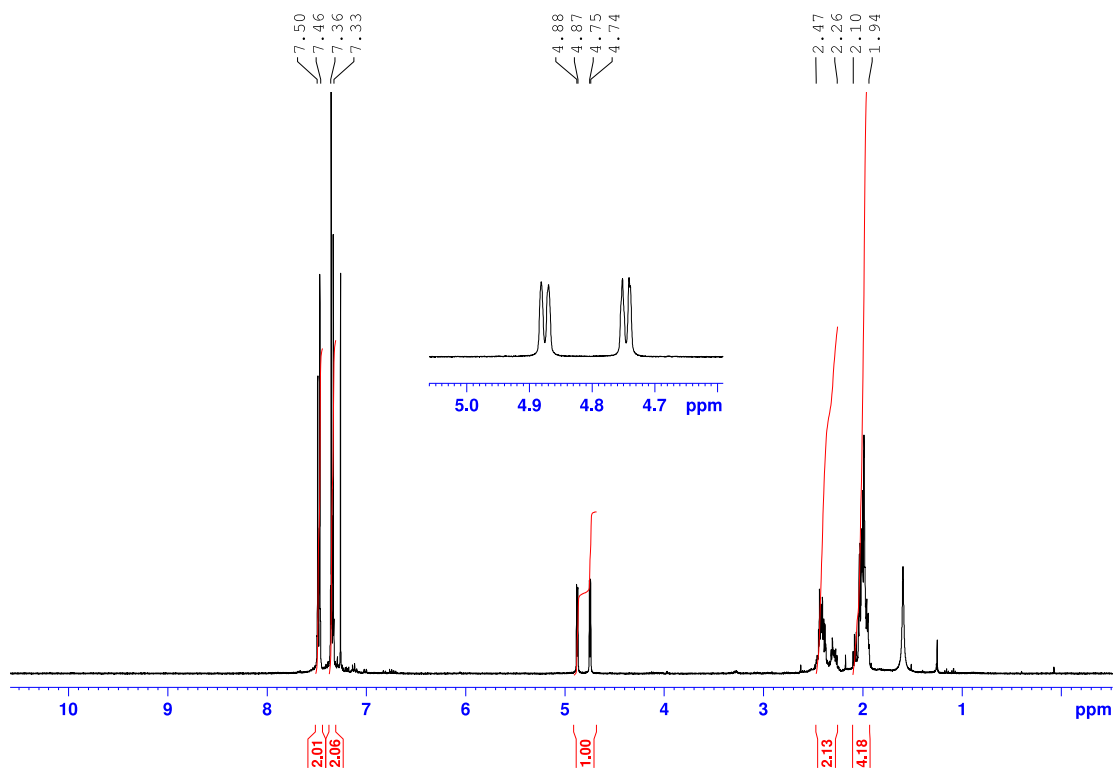

**Fig. S58.**  $^1\text{H}$  NMR spectrum ( $\text{CDCl}_3$ , 400 MHz) of compound 19.

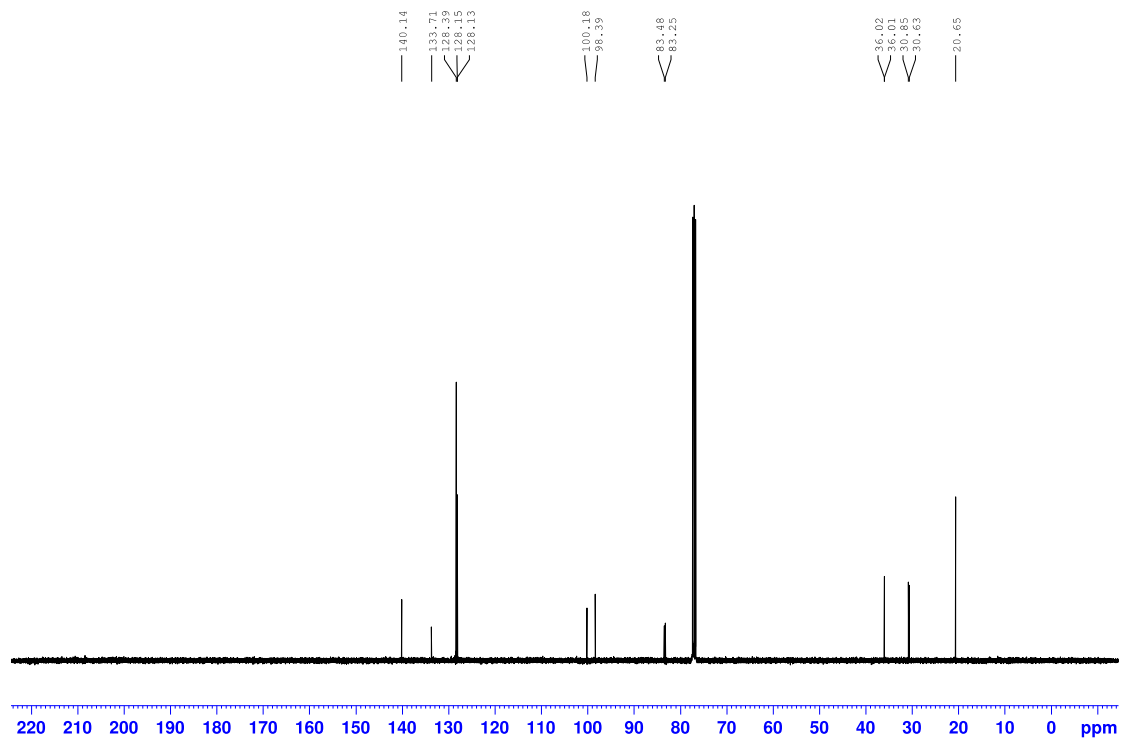

**Fig. S59.**  $^{13}\text{C}\{^1\text{H}\}$  NMR spectrum ( $\text{CDCl}_3$ , 100 MHz) of compound **19**.

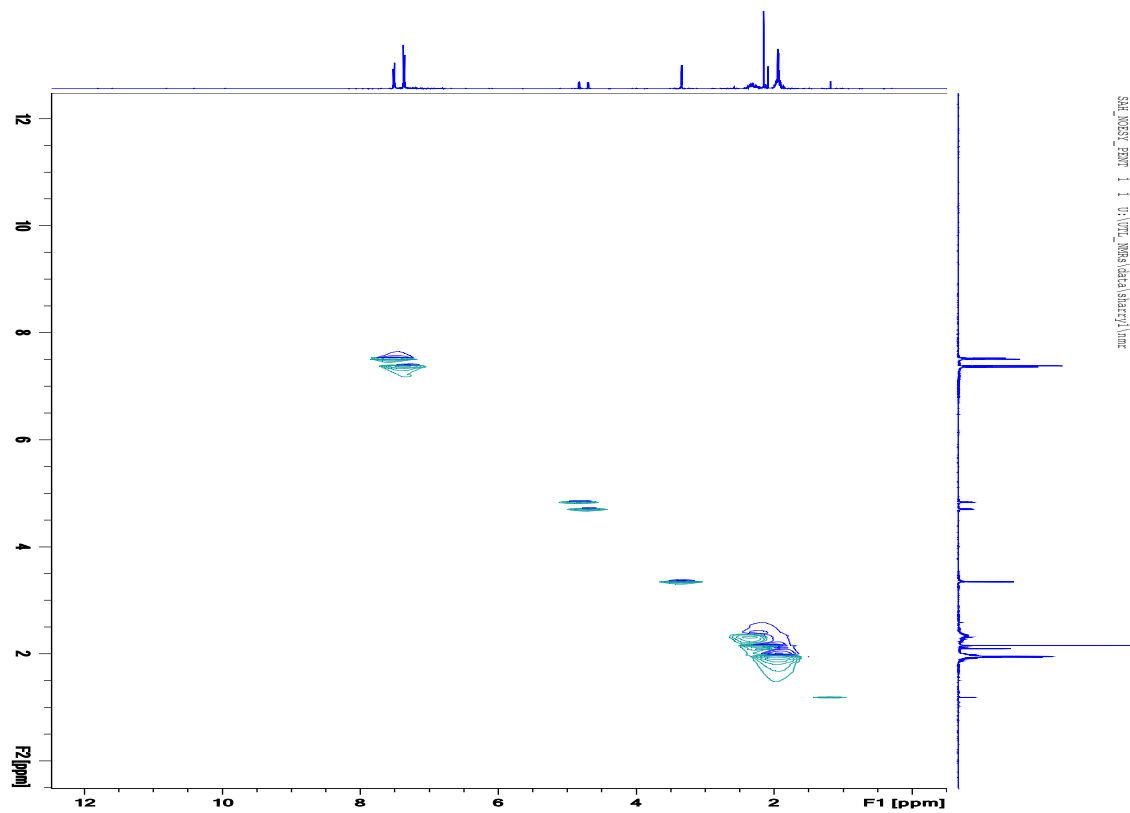

**Fig. S60.** NOESY (CDCl<sub>3</sub>, 300 MHz) of compound **19**.

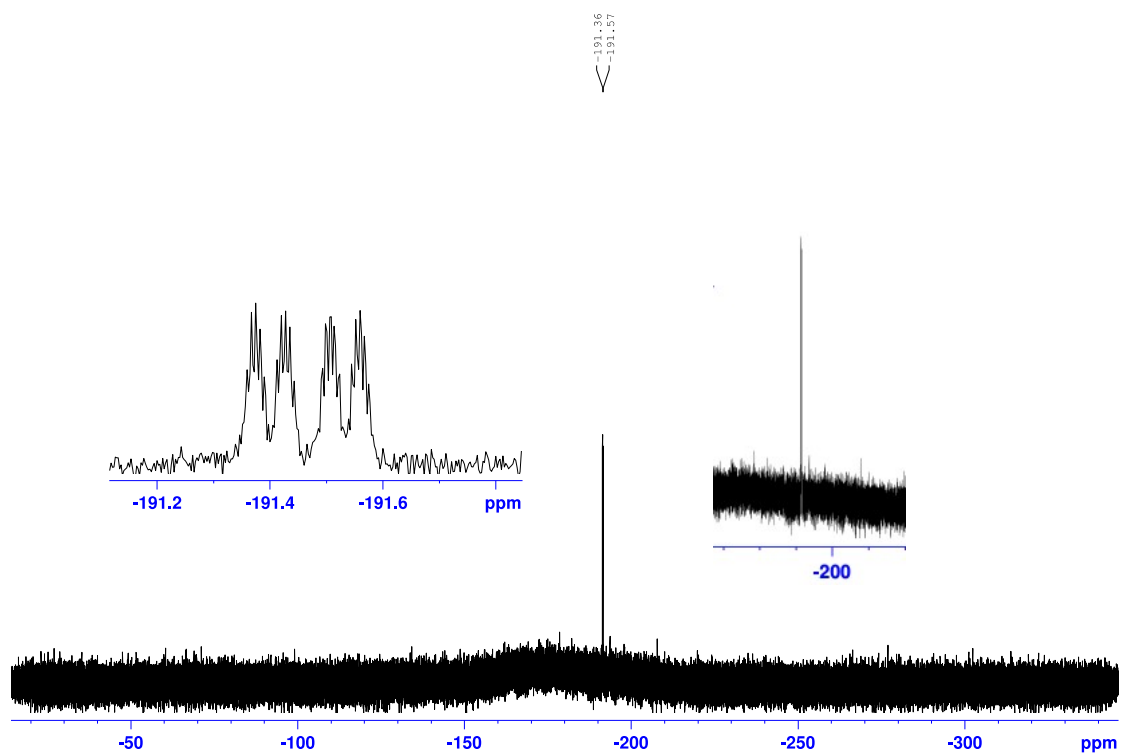

**Fig. S61.**  $^{19}\text{F}$  NMR spectrum ( $\text{CDCl}_3$ , 282 MHz) of compound **20**.

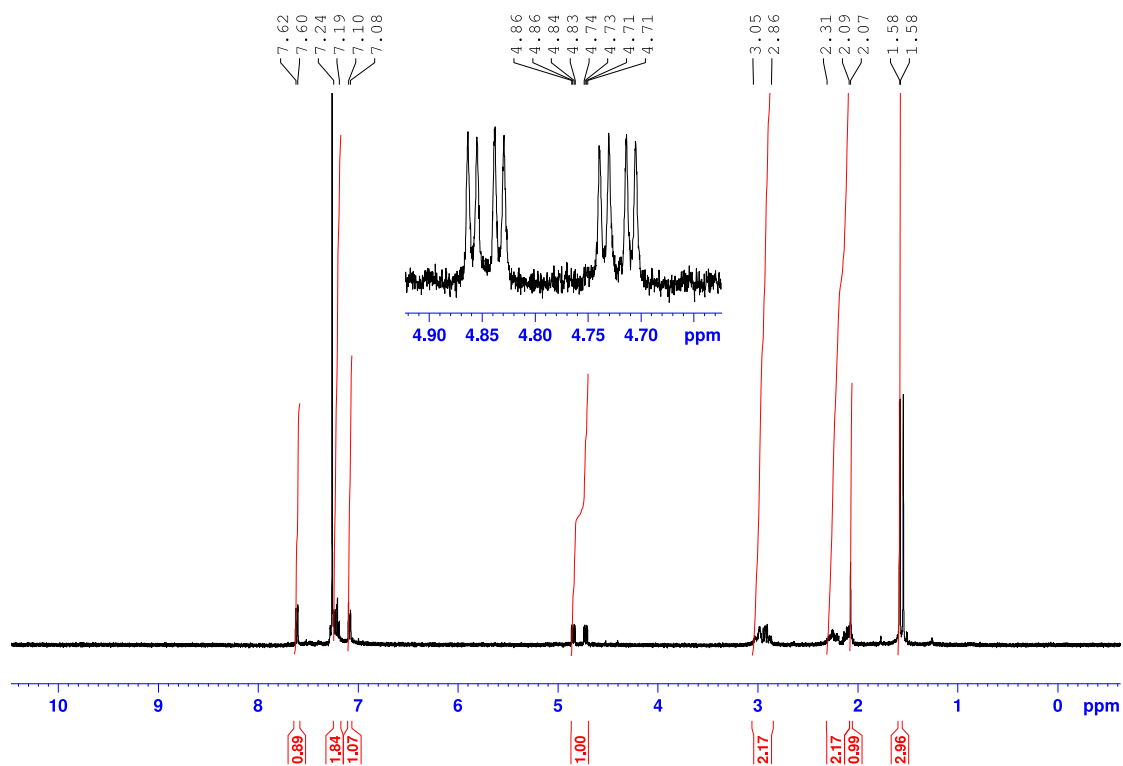

Fig. S62. <sup>1</sup>H NMR spectrum (CDCl<sub>3</sub>, 400 MHz) of compound 20.

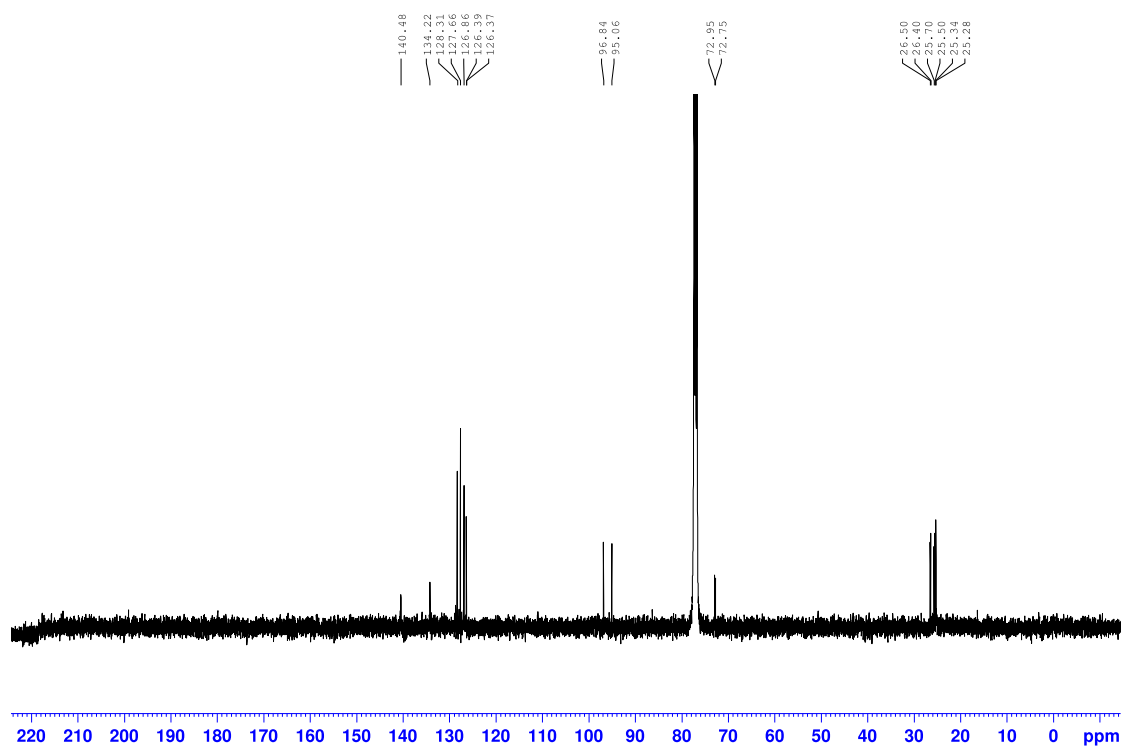

**Fig. S63.**  $^{13}\text{C}\{^1\text{H}\}$  NMR spectrum ( $\text{CDCl}_3$ , 100 MHz) of compound **20**.

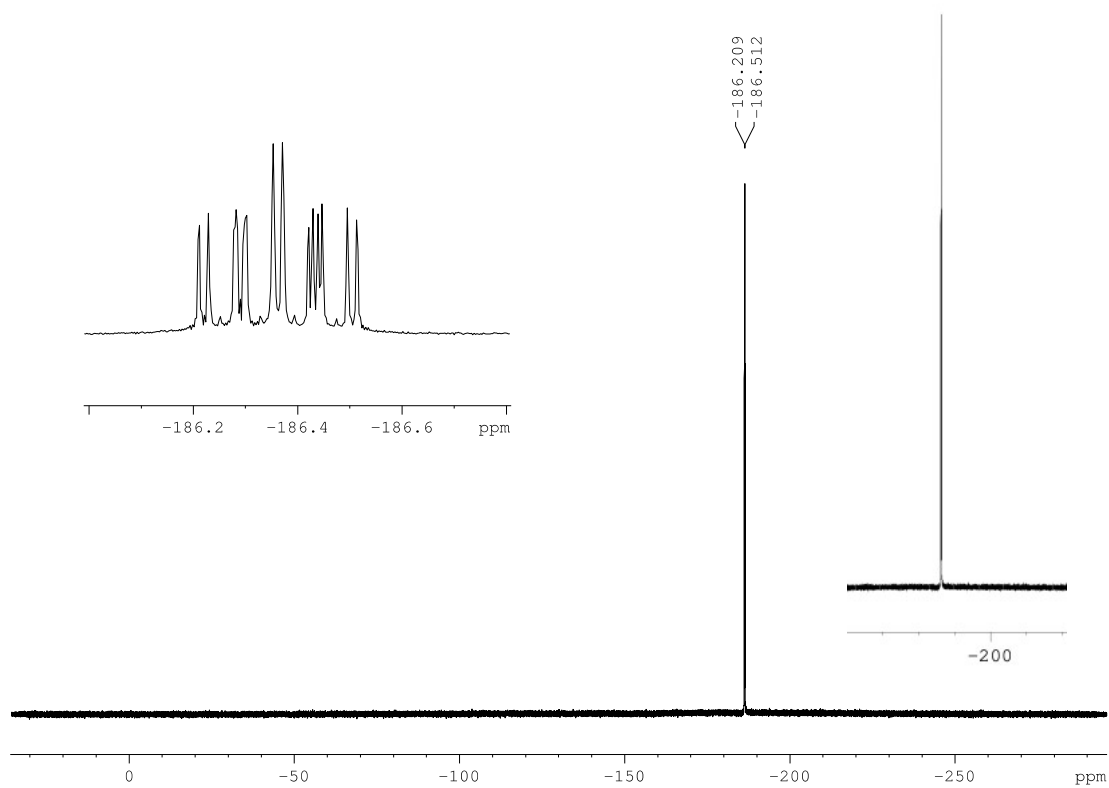

**Fig. S64.**  $^{19}\text{F}$  NMR spectrum ( $\text{CDCl}_3$ , 282 MHz) of compound **21**.



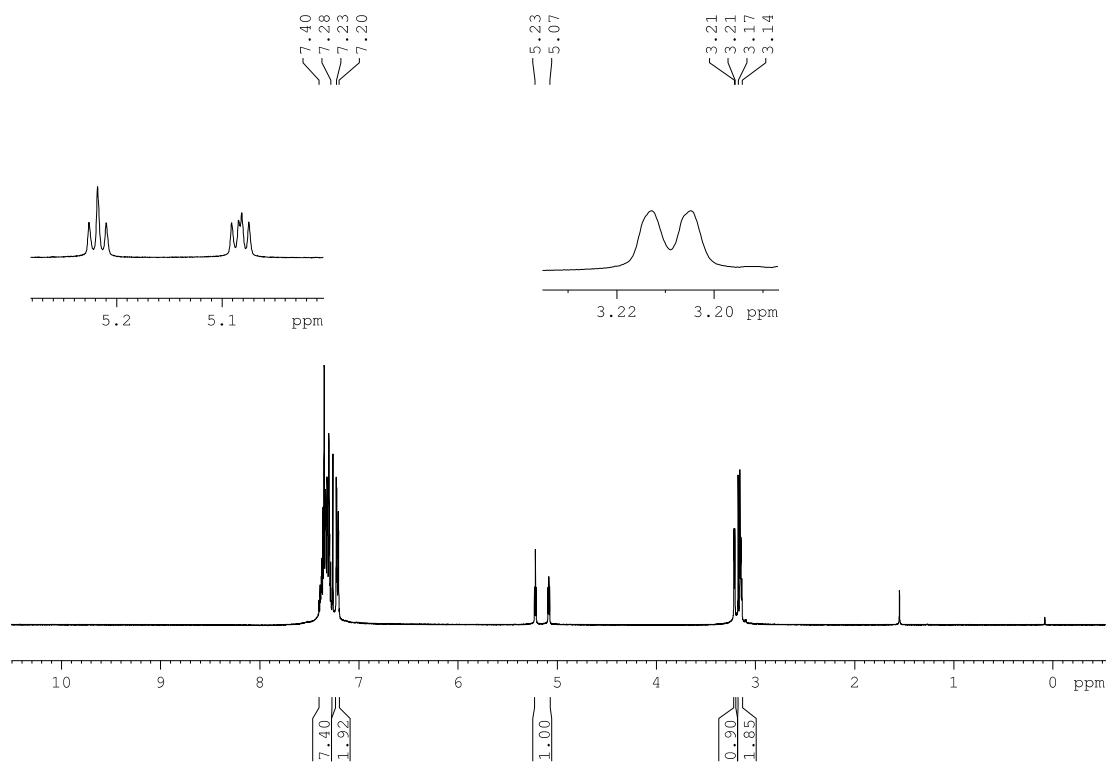

**Fig. S65.**  $^1\text{H}$  NMR spectrum ( $\text{CDCl}_3$ , 400 MHz) of compound **21**.

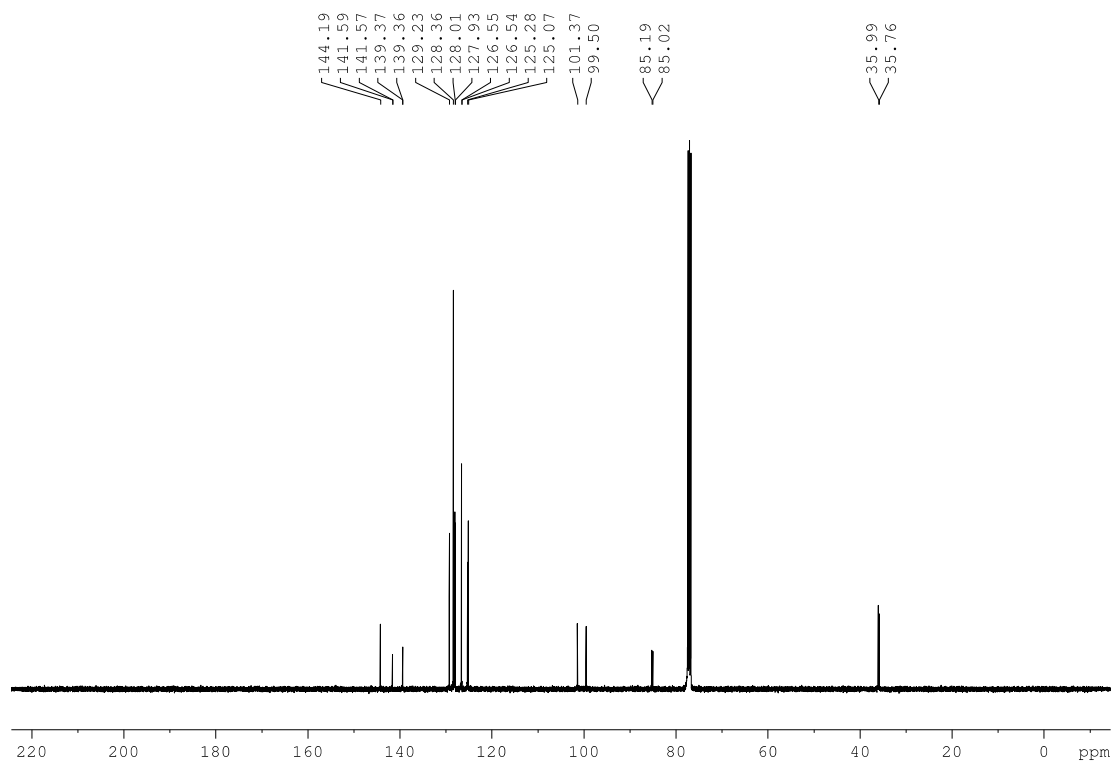

**Fig. S66.**  $^{13}\text{C}\{^1\text{H}\}$  NMR spectrum ( $\text{CDCl}_3$ , 100 MHz) of compound **21**.

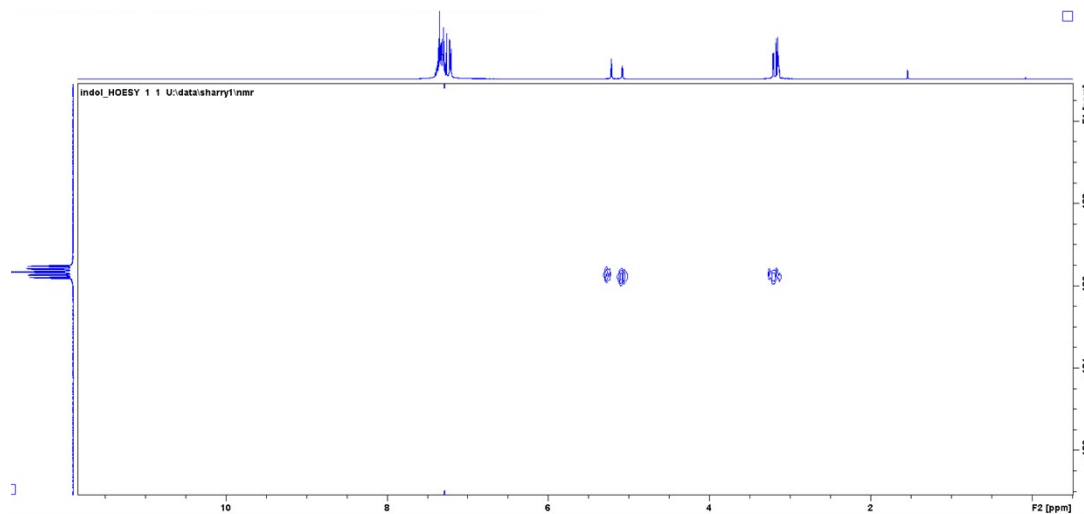

**Fig. S67.**  $^{19}\text{F}$ - $^1\text{H}$  HOESY ( $\text{CDCl}_3$ , 300 MHz) of compound **21**.

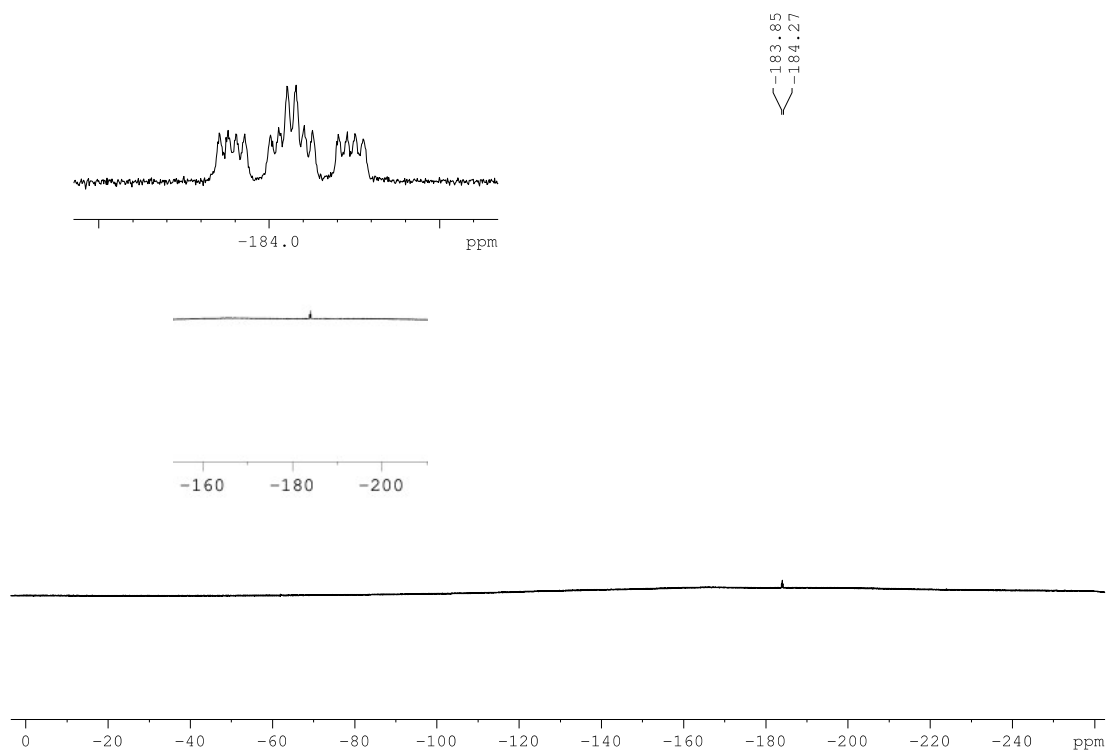

**Fig. S68.**  $^{19}\text{F}$  NMR spectrum ( $\text{CDCl}_3$ , 282 MHz) of compound **22**.

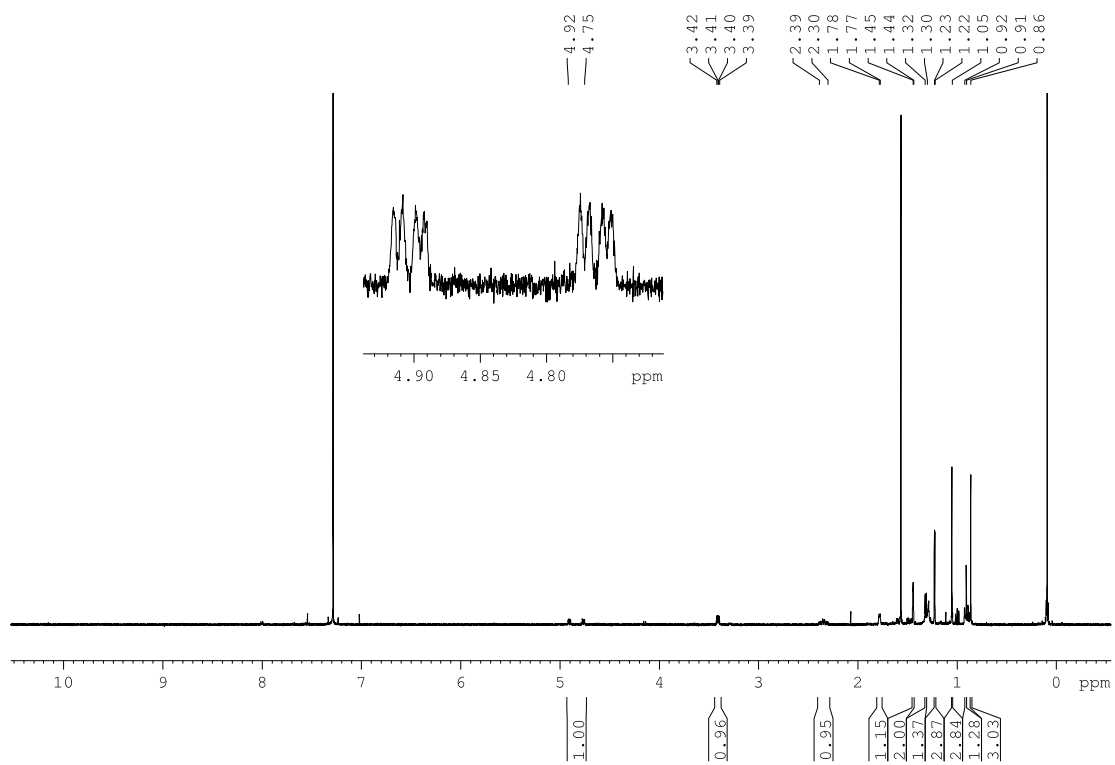

**Fig. S69.**  $^1\text{H}$  NMR spectrum ( $\text{CDCl}_3$ , 400 MHz) of compound **22**.

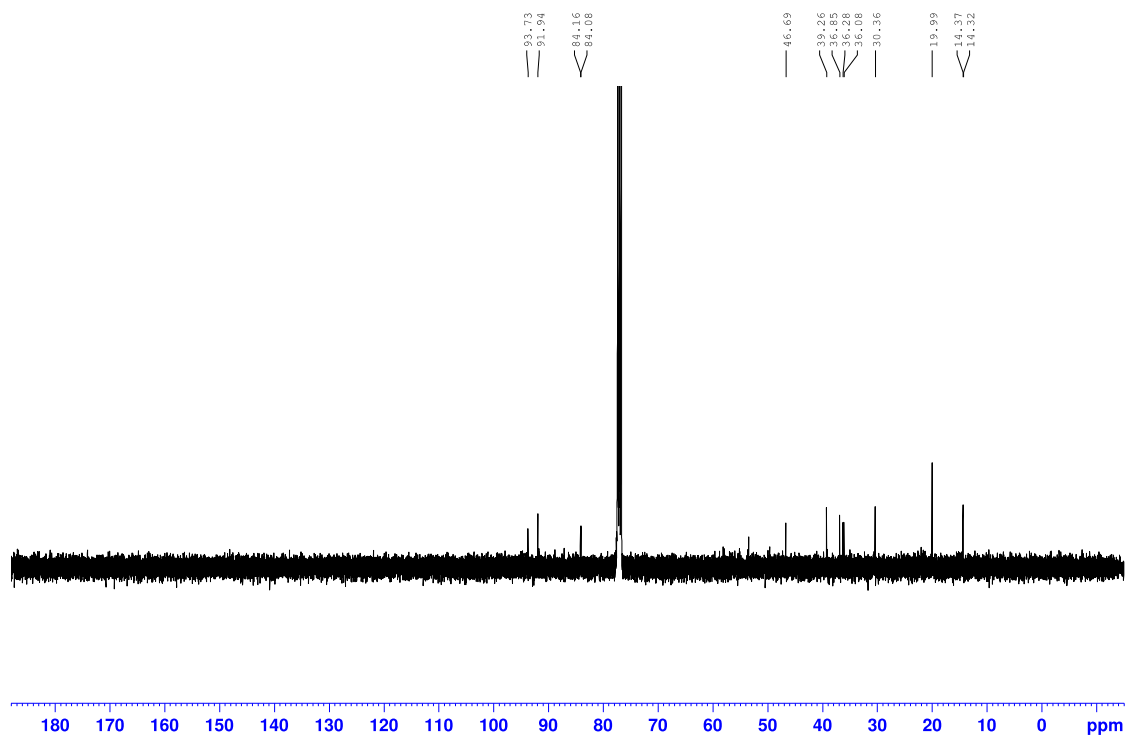

**Fig. S70.**  $^{13}\text{C}\{^1\text{H}\}$  NMR spectrum ( $\text{CDCl}_3$ , 100 MHz) of compound **22**.

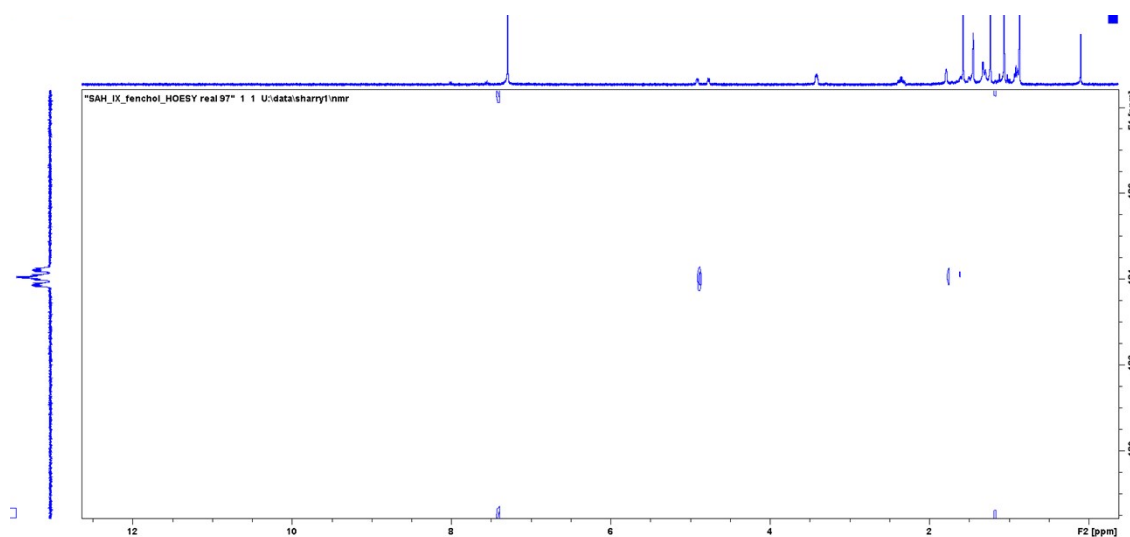

**Fig. S71.**  $^{19}\text{F}$ - $^1\text{H}$  HOESY ( $\text{CDCl}_3$ , 300 MHz) of compound **22**.

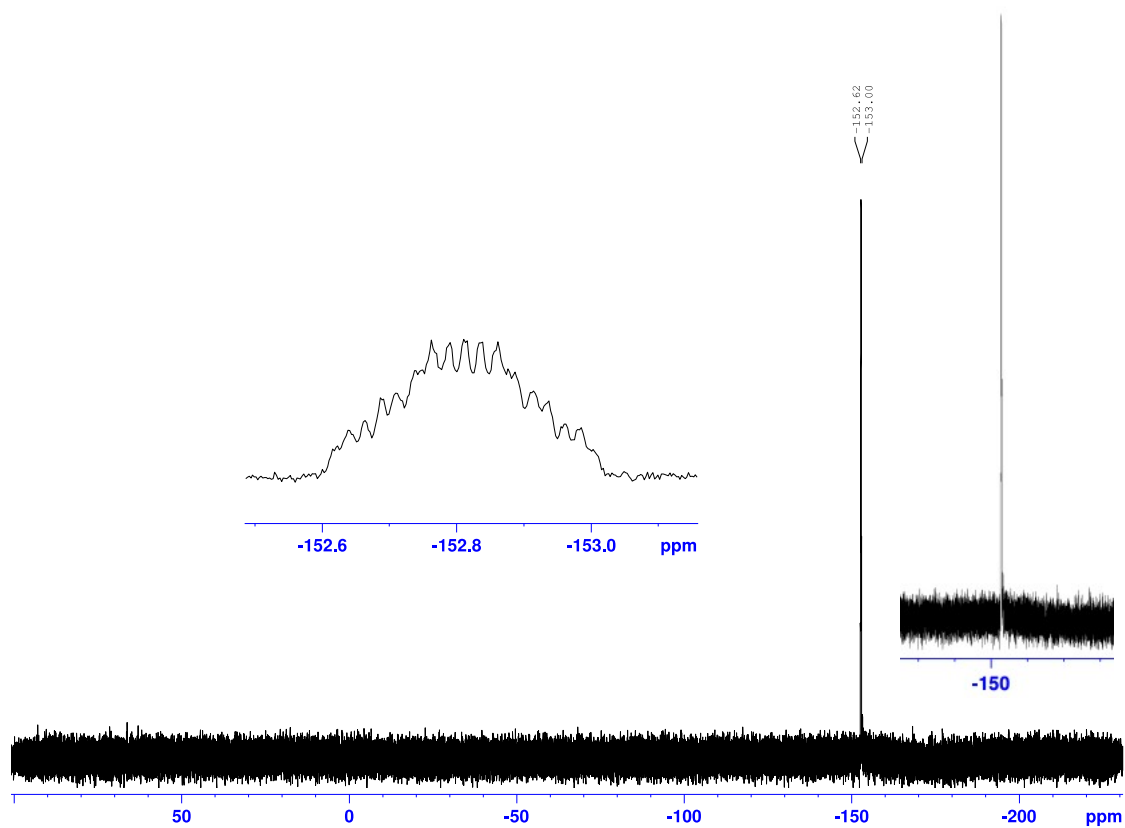

**Fig. S72.**  $^{19}\text{F}$  NMR spectrum ( $\text{CDCl}_3$ , 282 MHz) of compound **23**.



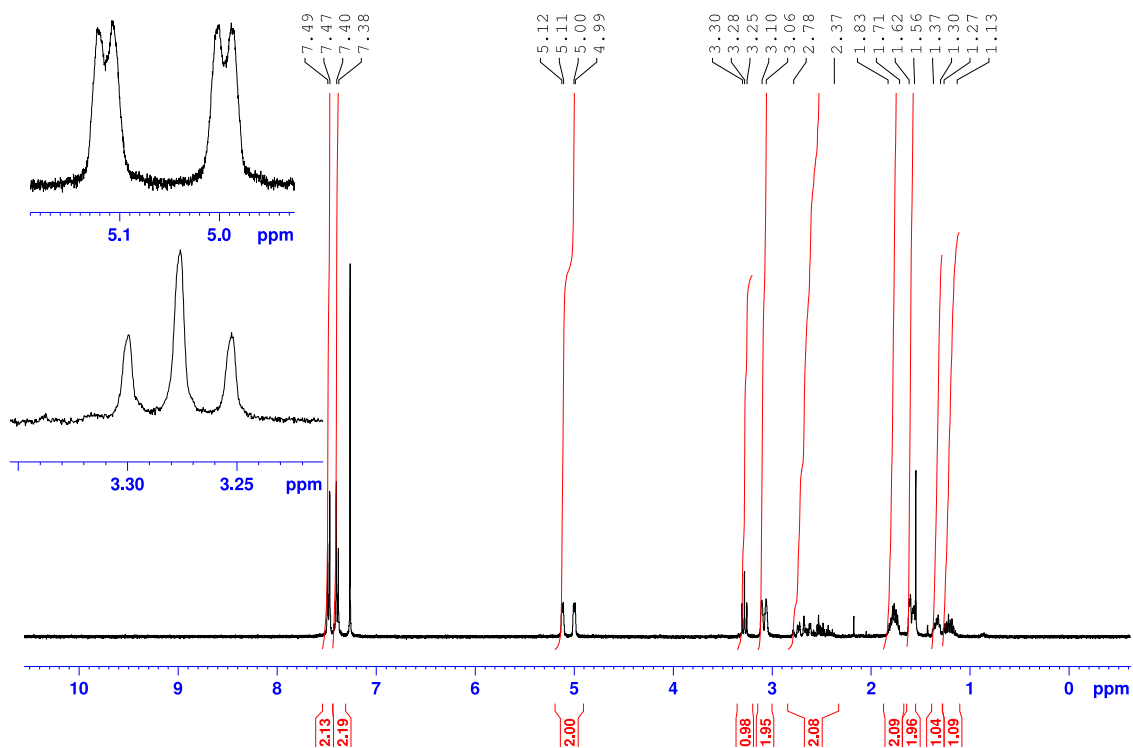

**Fig. S73.**  $^1\text{H}$  NMR spectrum ( $\text{CDCl}_3$ , 400 MHz) of compound **23**.

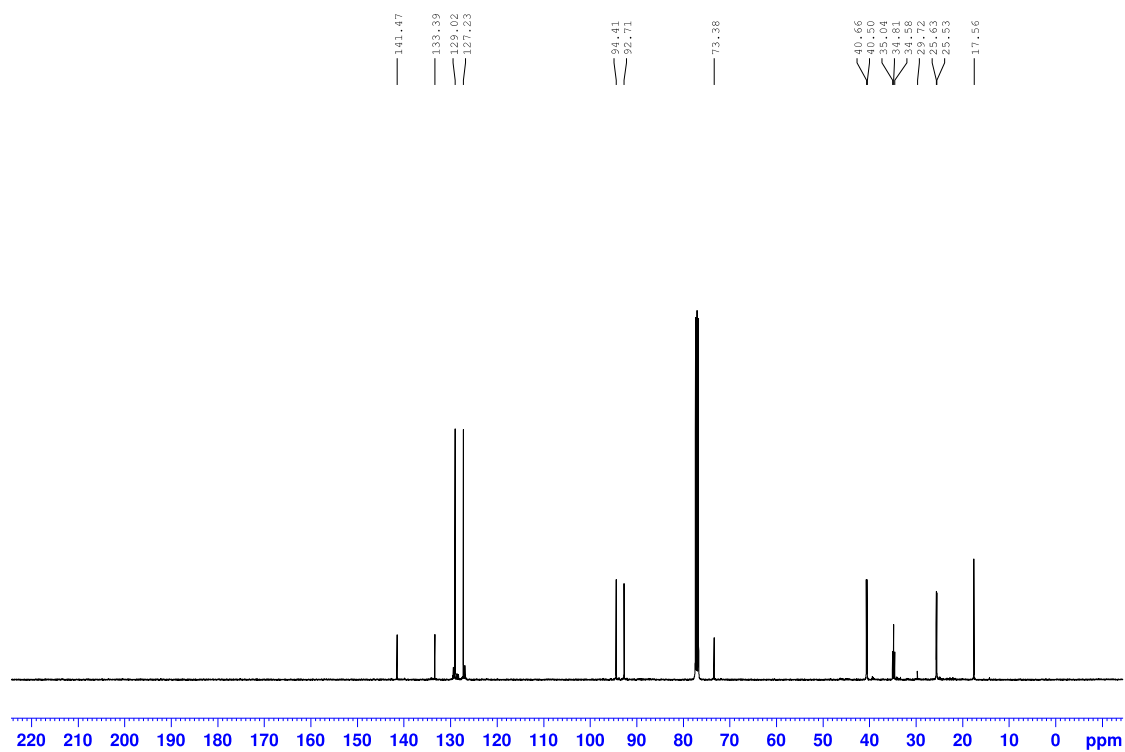

**Fig. S74.**  $^{13}\text{C}\{^1\text{H}\}$  NMR spectrum ( $\text{CDCl}_3$ , 100 MHz) of compound **23**.

## Computational Data

**Table S1.** Starting material for compound **6** geometry optimization (B3LYP/6-311++G\*\*).

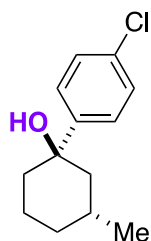

| Center Number | Atomic Number | Forces (Hartrees/Bohr) |              |              |
|---------------|---------------|------------------------|--------------|--------------|
|               |               | X                      | Y            | Z            |
| 1             | 6             | -0.000009341           | 0.000000377  | 0.000012144  |
| 2             | 6             | 0.000000854            | -0.000000990 | -0.000007473 |
| 3             | 6             | -0.000007527           | -0.000009624 | 0.000010466  |
| 4             | 6             | -0.000014961           | -0.000017677 | -0.000007326 |
| 5             | 6             | 0.000017283            | -0.000009083 | -0.000006966 |
| 6             | 6             | -0.000008860           | -0.000002709 | -0.000002734 |
| 7             | 1             | -0.000001510           | -0.000005680 | -0.000005619 |
| 8             | 1             | -0.000004347           | -0.000006844 | 0.000006262  |
| 9             | 1             | -0.000004010           | -0.000008615 | 0.000004479  |
| 10            | 1             | -0.000006474           | -0.000003711 | -0.000000239 |
| 11            | 1             | 0.000003761            | 0.000006116  | -0.000004803 |
| 12            | 1             | 0.000006084            | 0.000002111  | -0.000008124 |
| 13            | 1             | 0.000004872            | 0.000003918  | 0.000001061  |
| 14            | 1             | -0.000002289           | -0.000001834 | 0.000006822  |
| 15            | 1             | -0.000004100           | -0.000006920 | -0.000006956 |
| 16            | 6             | -0.000010918           | -0.000003133 | -0.000000168 |
| 17            | 1             | -0.000004020           | -0.000000252 | 0.000009077  |
| 18            | 1             | -0.000008054           | -0.000001836 | 0.000009709  |
| 19            | 1             | -0.000006429           | -0.000001783 | 0.000007144  |
| 20            | 6             | -0.000006470           | 0.000004663  | 0.000009046  |
| 21            | 6             | -0.000001790           | 0.000010177  | -0.000001368 |
| 22            | 6             | 0.000007896            | 0.000001423  | 0.000001021  |
| 23            | 6             | 0.000010579            | 0.000001835  | -0.000007293 |
| 24            | 1             | 0.000003216            | 0.000004702  | -0.000000211 |
| 25            | 6             | -0.000002399           | 0.000012871  | -0.000004477 |
| 26            | 1             | 0.000003377            | 0.000005353  | -0.000004769 |
| 27            | 6             | 0.000014631            | 0.000002098  | 0.000001349  |
| 28            | 1             | 0.000007074            | 0.000008526  | -0.000003306 |
| 29            | 1             | 0.000008550            | 0.000007838  | -0.000001745 |
| 30            | 8             | 0.000005412            | -0.000000231 | -0.000000471 |
| 31            | 1             | 0.000000998            | -0.000003436 | -0.000001488 |

32 17 0.000008914 0.000012346 -0.000003044

---

**Table S2.** Starting material for compound **7** geometry optimization (B3LYP/6-311++G\*\*).

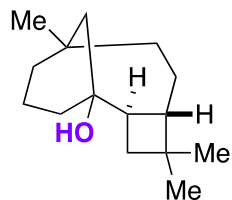

---

| Center Number | Atomic Number | Forces (Hartrees/Bohr) |              |              |
|---------------|---------------|------------------------|--------------|--------------|
|               |               | X                      | Y            | Z            |
| 1             | 6             | 0.000010683            | 0.000020438  | 0.000004752  |
| 2             | 1             | 0.000000998            | -0.000011461 | -0.000006563 |
| 3             | 6             | -0.000007114           | -0.000007830 | -0.000017815 |
| 4             | 1             | 0.000012294            | 0.000001940  | -0.000006995 |
| 5             | 6             | -0.000008699           | -0.000000038 | 0.000012674  |
| 6             | 1             | 0.000004839            | -0.000001928 | 0.000001341  |
| 7             | 6             | 0.000006974            | -0.000015725 | -0.000008584 |
| 8             | 1             | 0.000000923            | -0.000007320 | -0.000004840 |
| 9             | 6             | 0.000002307            | -0.000007369 | 0.000004029  |
| 10            | 1             | -0.000001810           | -0.000009747 | 0.000003303  |
| 11            | 1             | -0.000003419           | -0.000007043 | 0.000010201  |
| 12            | 1             | 0.000001025            | -0.000010243 | 0.000004526  |
| 13            | 6             | -0.000005180           | 0.000003840  | 0.000003192  |
| 14            | 1             | 0.000000585            | 0.000003146  | 0.000001738  |
| 15            | 1             | -0.000001206           | -0.000000649 | 0.000007647  |
| 16            | 1             | 0.000000851            | 0.000000764  | 0.000000534  |
| 17            | 6             | 0.000004510            | 0.000012685  | 0.000000782  |
| 18            | 6             | -0.000007801           | -0.000002875 | 0.000005841  |
| 19            | 1             | -0.000001594           | 0.000001711  | 0.000007540  |
| 20            | 1             | -0.000000858           | 0.000006243  | 0.000003008  |
| 21            | 6             | 0.000001984            | 0.000007384  | 0.000008517  |
| 22            | 1             | -0.000006197           | 0.000002048  | 0.000006418  |
| 23            | 1             | -0.000001996           | -0.000005199 | 0.000004911  |
| 24            | 6             | -0.000006919           | -0.000004798 | 0.000007826  |
| 25            | 6             | 0.000005444            | 0.000000311  | 0.000007791  |
| 26            | 1             | -0.000002239           | 0.000002999  | 0.000005812  |
| 27            | 1             | 0.000000540            | 0.000000027  | -0.000002776 |
| 28            | 1             | -0.000001158           | -0.000005998 | 0.000001921  |
| 29            | 6             | -0.000001920           | 0.000001041  | -0.000002958 |
| 30            | 1             | -0.000000468           | 0.000011643  | 0.000003795  |
| 31            | 1             | 0.000000367            | 0.000008030  | -0.000002664 |

---

|    |   |              |              |              |
|----|---|--------------|--------------|--------------|
| 32 | 6 | -0.000008582 | 0.000003000  | 0.000006510  |
| 33 | 1 | -0.000001488 | 0.000008087  | -0.000003758 |
| 34 | 1 | -0.000008231 | 0.000011793  | -0.000004266 |
| 35 | 6 | 0.000004375  | 0.000009366  | -0.000015622 |
| 36 | 1 | 0.000004741  | 0.000002293  | -0.000007582 |
| 37 | 1 | 0.000002766  | 0.000007253  | -0.000006436 |
| 38 | 6 | -0.000002410 | -0.000005427 | -0.000004856 |
| 39 | 1 | 0.000005337  | -0.000002213 | -0.000009433 |
| 40 | 1 | 0.000003366  | -0.000002762 | 0.000001567  |
| 41 | 8 | -0.000000303 | -0.000019048 | -0.000016443 |
| 42 | 1 | 0.000004683  | 0.000001632  | -0.000004587 |

**Table S3.** Starting material for compound **8** geometry optimization (B3LYP/6-311++G\*\*).

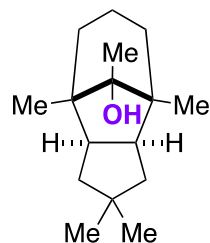

| Center Number | Atomic Number | Forces (Hartrees/Bohr) |              |              |
|---------------|---------------|------------------------|--------------|--------------|
|               |               | X                      | Y            | Z            |
| 1             | 6             | 0.000006709            | 0.000005101  | 0.000009759  |
| 2             | 6             | 0.000005703            | -0.000004947 | 0.000010110  |
| 3             | 6             | -0.000002891           | -0.000010948 | -0.000016994 |
| 4             | 6             | -0.000003300           | 0.000011207  | -0.000016986 |
| 5             | 6             | -0.000002030           | 0.000003207  | 0.000010487  |
| 6             | 6             | -0.000002120           | -0.000002974 | 0.000010006  |
| 7             | 6             | -0.000005953           | -0.000000092 | 0.000001312  |
| 8             | 1             | -0.000000772           | -0.000001733 | 0.000005196  |
| 9             | 1             | -0.000000706           | 0.000001346  | 0.000001091  |
| 10            | 1             | -0.000000499           | -0.000001128 | 0.000000613  |
| 11            | 1             | -0.000000626           | 0.000001737  | 0.000004865  |
| 12            | 1             | -0.000003210           | 0.000002851  | 0.000001301  |
| 13            | 1             | -0.000003304           | -0.000002913 | 0.000001163  |
| 14            | 1             | 0.000001291            | -0.000000055 | 0.000003856  |
| 15            | 1             | -0.000008918           | -0.000000063 | 0.000003913  |
| 16            | 6             | 0.000005936            | 0.000000141  | 0.000003421  |
| 17            | 6             | 0.000002892            | -0.000006023 | -0.000002548 |
| 18            | 1             | 0.000000654            | -0.000002354 | 0.000004355  |
| 19            | 1             | -0.000001000           | -0.000004134 | -0.000000130 |
| 20            | 1             | -0.000000306           | 0.000001074  | 0.000003414  |

|    |   |              |              |              |
|----|---|--------------|--------------|--------------|
| 21 | 6 | 0.000002957  | 0.000005926  | -0.000002862 |
| 22 | 1 | 0.000000655  | 0.000002290  | 0.000004325  |
| 23 | 1 | 0.000000016  | -0.000000997 | 0.000003448  |
| 24 | 1 | -0.000000973 | 0.000004114  | -0.000000111 |
| 25 | 6 | 0.000001563  | -0.000000873 | -0.000010428 |
| 26 | 1 | -0.000006064 | -0.000001056 | 0.000002532  |
| 27 | 1 | 0.000000859  | -0.000004205 | -0.000003444 |
| 28 | 6 | 0.000001730  | 0.000000217  | -0.000010740 |
| 29 | 1 | -0.000006039 | 0.000000959  | 0.000002408  |
| 30 | 1 | 0.000000632  | 0.000004257  | -0.000003901 |
| 31 | 6 | -0.000002192 | 0.000000010  | -0.000009193 |
| 32 | 6 | 0.000001030  | 0.000000003  | -0.000013631 |
| 33 | 1 | 0.000001633  | 0.000001474  | -0.000001564 |
| 34 | 1 | 0.000001655  | -0.000001463 | -0.000001569 |
| 35 | 1 | 0.000004538  | -0.000000036 | 0.000000584  |
| 36 | 6 | 0.000002026  | 0.000000084  | 0.000004154  |
| 37 | 1 | -0.000000064 | -0.000000669 | -0.000004078 |
| 38 | 1 | -0.000000033 | 0.000000651  | -0.000004096 |
| 39 | 1 | -0.000005378 | 0.000000043  | -0.000004208 |
| 40 | 8 | 0.000012179  | 0.000000167  | 0.000016024  |
| 41 | 1 | 0.000002634  | 0.000000127  | 0.000001819  |
| 42 | 6 | 0.000002855  | -0.000000248 | -0.000006074 |
| 43 | 1 | 0.000002814  | 0.000007556  | 0.000002695  |
| 44 | 1 | 0.000002855  | -0.000007453 | 0.000002708  |
| 45 | 1 | -0.000009439 | -0.000000180 | -0.000003002 |

-----

**Table S4.** Starting material for compound **9** geometry optimization (B3LYP/6-311++G\*\*).

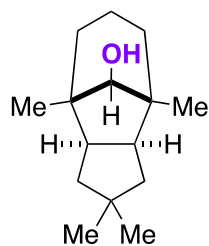

-----

| Center Number | Atomic Number | Forces (Hartrees/Bohr) |              |              |
|---------------|---------------|------------------------|--------------|--------------|
|               |               | X                      | Y            | Z            |
| 1             | 6             | 0.000003550            | -0.000025675 | -0.000007088 |
| 2             | 6             | 0.000003377            | 0.000025600  | -0.000006942 |
| 3             | 6             | -0.000003112           | -0.000013770 | 0.000009305  |
| 4             | 6             | -0.000003313           | 0.000013324  | 0.000009312  |
| 5             | 6             | 0.000002192            | -0.000007665 | 0.000003675  |
| 6             | 6             | 0.000002725            | 0.000007319  | 0.000003487  |

-----

|    |   |              |              |              |
|----|---|--------------|--------------|--------------|
| 7  | 6 | 0.000019956  | -0.000000089 | 0.000003998  |
| 8  | 1 | -0.000004367 | 0.000003106  | -0.000007465 |
| 9  | 1 | -0.000003008 | -0.000006243 | 0.000008566  |
| 10 | 1 | -0.000003406 | 0.000006497  | 0.000008411  |
| 11 | 1 | -0.000004339 | -0.000003077 | -0.000007478 |
| 12 | 1 | -0.000000939 | 0.000004167  | 0.000003378  |
| 13 | 1 | -0.000001100 | -0.000004054 | 0.000003517  |
| 14 | 1 | -0.000002765 | 0.000000005  | 0.000008422  |
| 15 | 1 | 0.000006593  | 0.000000045  | -0.000008458 |
| 16 | 6 | 0.000024659  | 0.000000552  | -0.000017521 |
| 17 | 1 | -0.000010598 | 0.000000299  | 0.000013189  |
| 18 | 6 | -0.000007938 | 0.000006565  | -0.000003544 |
| 19 | 1 | 0.000000990  | -0.000004920 | 0.000005217  |
| 20 | 1 | -0.000000958 | -0.000001109 | 0.000002538  |
| 21 | 1 | 0.000003148  | -0.000000180 | -0.000005155 |
| 22 | 6 | -0.000008098 | -0.000006603 | -0.000003426 |
| 23 | 1 | 0.000001003  | 0.000005118  | 0.000005176  |
| 24 | 1 | 0.000003242  | 0.000000174  | -0.000005150 |
| 25 | 1 | -0.000000914 | 0.000001102  | 0.000002560  |
| 26 | 6 | 0.000016675  | 0.000008513  | -0.000008099 |
| 27 | 1 | -0.000007513 | -0.000000540 | -0.000001154 |
| 28 | 1 | 0.000000562  | -0.000005448 | 0.000007326  |
| 29 | 6 | 0.000016716  | -0.000008415 | -0.000008145 |
| 30 | 1 | -0.000007525 | 0.000000527  | -0.000001142 |
| 31 | 1 | 0.000000548  | 0.000005422  | 0.000007335  |
| 32 | 6 | -0.000028355 | -0.000000035 | -0.000007758 |
| 33 | 6 | 0.000000346  | 0.000000014  | -0.000008699 |
| 34 | 1 | 0.000000348  | -0.000000147 | -0.000004437 |
| 35 | 1 | 0.000000344  | 0.000000152  | -0.000004436 |
| 36 | 1 | 0.000004162  | 0.000000000  | -0.000003282 |
| 37 | 6 | 0.000000049  | 0.000000008  | -0.000000938 |
| 38 | 1 | 0.000000464  | -0.000002259 | -0.000002437 |
| 39 | 1 | 0.000000469  | 0.000002250  | -0.000002440 |
| 40 | 1 | -0.000009225 | -0.000000006 | -0.000001279 |
| 41 | 8 | -0.000008597 | -0.000001638 | 0.000015790  |
| 42 | 1 | 0.000003954  | 0.000001114  | 0.000005273  |

**Table S5.** Starting material for compound **10** geometry optimization (B3LYP/6-311++G\*\*).

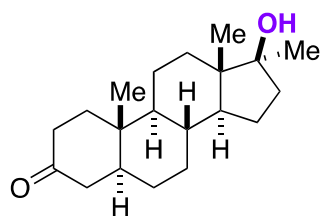

| Center<br>Number | Atomic<br>Number | Atomic<br>Type | Coordinates (Angstroms) |           |           |
|------------------|------------------|----------------|-------------------------|-----------|-----------|
|                  |                  |                | X                       | Y         | Z         |
| 1                | 6                | 0              | 1.936887                | -0.389950 | 0.314988  |
| 2                | 6                | 0              | 2.706365                | -1.558553 | -0.352904 |
| 3                | 6                | 0              | 4.232623                | -1.521053 | -0.133180 |
| 4                | 1                | 0              | 2.331393                | -2.518486 | 0.010116  |
| 5                | 1                | 0              | 4.460486                | -1.724203 | 0.921050  |
| 6                | 1                | 0              | 4.738113                | -2.288043 | -0.723156 |
| 7                | 1                | 0              | 2.508076                | -1.535514 | -1.431496 |
| 8                | 6                | 0              | 0.437784                | -0.405359 | -0.151776 |
| 9                | 1                | 0              | 0.473715                | -0.346936 | -1.251411 |
| 10               | 6                | 0              | -0.348701               | 0.856852  | 0.311673  |
| 11               | 1                | 0              | -0.391315               | 0.869149  | 1.407495  |
| 12               | 6                | 0              | -0.317081               | -1.710259 | 0.193101  |
| 13               | 1                | 0              | 0.198710                | -2.562690 | -0.256934 |
| 14               | 1                | 0              | -0.296003               | -1.881161 | 1.272891  |
| 15               | 6                | 0              | -1.783133               | 0.778566  | -0.227147 |
| 16               | 1                | 0              | -1.684625               | 0.718852  | -1.320792 |
| 17               | 6                | 0              | -2.551276               | -0.492801 | 0.211941  |
| 18               | 6                | 0              | -1.779269               | -1.719838 | -0.298448 |
| 19               | 1                | 0              | -1.773562               | -1.724251 | -1.393428 |
| 20               | 6                | 0              | 2.042702                | -0.517664 | 1.851005  |
| 21               | 1                | 0              | 3.073101                | -0.428138 | 2.200370  |
| 22               | 1                | 0              | 1.461655                | 0.244269  | 2.372523  |
| 23               | 1                | 0              | 1.678640                | -1.492462 | 2.183553  |
| 24               | 6                | 0              | -2.714633               | -0.583743 | 1.747530  |
| 25               | 1                | 0              | -3.272160               | 0.260701  | 2.156056  |
| 26               | 1                | 0              | -3.268226               | -1.486891 | 2.006835  |
| 27               | 1                | 0              | -1.750969               | -0.618110 | 2.256499  |
| 28               | 6                | 0              | 4.844423                | -0.173390 | -0.469609 |
| 29               | 6                | 0              | 4.089699                | 1.029705  | 0.065172  |
| 30               | 1                | 0              | 4.513221                | 1.929086  | -0.387688 |
| 31               | 1                | 0              | 4.275272                | 1.093935  | 1.145263  |
| 32               | 8                | 0              | 5.861374                | -0.065721 | -1.122690 |
| 33               | 6                | 0              | 0.356351                | 2.144974  | -0.141600 |
| 34               | 1                | 0              | 0.292980                | 2.218693  | -1.236308 |
| 35               | 1                | 0              | -0.168388               | 3.018586  | 0.257593  |
| 36               | 6                | 0              | 1.829474                | 2.184721  | 0.274619  |
| 37               | 1                | 0              | 1.912279                | 2.272641  | 1.364542  |
| 38               | 1                | 0              | 2.310015                | 3.077637  | -0.140356 |
| 39               | 6                | 0              | 2.574423                | 0.935665  | -0.208603 |
| 40               | 1                | 0              | 2.459694                | 0.906629  | -1.302621 |
| 41               | 6                | 0              | -2.761729               | 1.931084  | 0.068105  |
| 42               | 1                | 0              | -2.658239               | 2.270172  | 1.103246  |



|    |   |   |           |           |           |
|----|---|---|-----------|-----------|-----------|
| 43 | 1 | 0 | -2.582748 | 2.799907  | -0.568849 |
| 44 | 1 | 0 | -2.269512 | -2.646380 | 0.019115  |
| 45 | 6 | 0 | -4.166300 | 1.308997  | -0.169126 |
| 46 | 1 | 0 | -4.810973 | 1.440005  | 0.702075  |
| 47 | 1 | 0 | -4.676893 | 1.773051  | -1.017667 |
| 48 | 6 | 0 | -3.961547 | -0.223100 | -0.415835 |
| 49 | 8 | 0 | -4.934803 | -1.016946 | 0.286246  |
| 50 | 1 | 0 | -5.783447 | -0.921714 | -0.158341 |
| 51 | 6 | 0 | -4.065083 | -0.562269 | -1.908540 |
| 52 | 1 | 0 | -3.941870 | -1.633916 | -2.074751 |
| 53 | 1 | 0 | -5.054435 | -0.271878 | -2.280248 |
| 54 | 1 | 0 | -3.328437 | -0.026714 | -2.511833 |

-----

**Table S6.** Starting material for compound **12** geometry optimization (B3LYP/6-311++G\*\*).

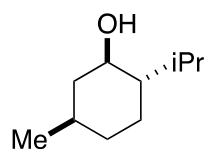

| Center Number | Atomic Number | Forces (Hartrees/Bohr) |              |              |
|---------------|---------------|------------------------|--------------|--------------|
|               |               | X                      | Y            | Z            |
| 1             | 6             | 0.000004327            | 0.000005308  | 0.000007415  |
| 2             | 6             | 0.000000291            | -0.000004518 | 0.000007822  |
| 3             | 6             | 0.000001374            | -0.000007737 | 0.000006029  |
| 4             | 6             | 0.000006992            | 0.000012907  | -0.000003059 |
| 5             | 6             | -0.000009071           | 0.000015155  | 0.000014155  |
| 6             | 6             | 0.000000500            | -0.000005745 | -0.000002070 |
| 7             | 1             | -0.000000312           | -0.000002317 | 0.000002563  |
| 8             | 1             | 0.000000307            | 0.000001182  | 0.000011441  |
| 9             | 1             | 0.000003103            | -0.000008102 | 0.000012764  |
| 10            | 1             | 0.000002525            | -0.000009550 | 0.000004835  |
| 11            | 1             | -0.000002984           | 0.000003723  | 0.000002261  |
| 12            | 1             | -0.000003023           | 0.000008262  | 0.000005329  |
| 13            | 1             | -0.000000928           | 0.000003646  | -0.000000082 |
| 14            | 1             | 0.000001605            | -0.000007362 | 0.000000140  |
| 15            | 6             | -0.000003072           | -0.000008796 | -0.000002542 |
| 16            | 1             | -0.000002735           | 0.000008168  | -0.000008280 |
| 17            | 6             | 0.000001651            | 0.000002014  | -0.000017398 |
| 18            | 1             | -0.000000671           | -0.000006084 | -0.000011290 |
| 19            | 1             | 0.000000502            | -0.000002681 | -0.000016532 |
| 20            | 1             | 0.000002503            | -0.000008688 | -0.000010642 |
| 21            | 6             | 0.000002781            | 0.000006150  | -0.000004742 |

|    |   |              |              |              |
|----|---|--------------|--------------|--------------|
| 22 | 1 | -0.000004005 | 0.000005171  | -0.000009104 |
| 23 | 1 | -0.000003297 | 0.000006896  | -0.000002276 |
| 24 | 1 | 0.000000116  | -0.000001681 | -0.000003820 |
| 25 | 6 | -0.000000399 | -0.000008807 | 0.000014637  |
| 26 | 1 | 0.000000681  | -0.000001334 | 0.000011459  |
| 27 | 1 | 0.000003855  | -0.000006336 | 0.000014830  |
| 28 | 1 | 0.000001197  | 0.000002187  | 0.000016619  |
| 29 | 1 | -0.000001614 | -0.000000382 | -0.000010778 |
| 30 | 8 | 0.000000390  | 0.000001002  | -0.000020801 |
| 31 | 1 | -0.000002588 | 0.000008348  | -0.000008885 |

Table S7. Starting material for compound **13** geometry optimization (B3LYP/6-311++G\*\*).

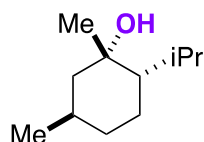

| Center Number | Atomic Number | Forces (Hartrees/Bohr) |              |              |
|---------------|---------------|------------------------|--------------|--------------|
|               |               | X                      | Y            | Z            |
| 1             | 6             | 0.000011992            | 0.000012963  | -0.000001122 |
| 2             | 6             | -0.000001525           | -0.000003847 | -0.000001569 |
| 3             | 6             | 0.000004784            | -0.000007121 | 0.000017894  |
| 4             | 6             | 0.000006770            | 0.000023229  | -0.000014700 |
| 5             | 6             | -0.000007417           | -0.000026299 | 0.000021266  |
| 6             | 6             | 0.000012887            | 0.000023159  | -0.000003637 |
| 7             | 1             | -0.000002423           | 0.000000167  | -0.000000838 |
| 8             | 1             | -0.000000198           | 0.000001491  | 0.000005895  |
| 9             | 1             | 0.000006193            | -0.000003918 | 0.000012502  |
| 10            | 1             | 0.000002961            | -0.000011317 | 0.000005542  |
| 11            | 1             | -0.000005498           | 0.000002719  | 0.000007325  |
| 12            | 1             | -0.000009404           | -0.000000045 | 0.000000437  |
| 13            | 1             | -0.000001150           | 0.000002342  | -0.000004005 |
| 14            | 1             | 0.000003933            | -0.000003210 | 0.000002465  |
| 15            | 6             | 0.000001337            | 0.000007508  | -0.000002845 |
| 16            | 1             | -0.000004879           | 0.000005965  | -0.000008418 |
| 17            | 1             | -0.000009455           | 0.000002354  | -0.000005547 |
| 18            | 1             | -0.000004819           | 0.000004461  | -0.000001701 |
| 19            | 6             | 0.000000421            | -0.000008897 | -0.000010678 |
| 20            | 1             | -0.000004352           | 0.000005043  | -0.000001116 |
| 21            | 6             | 0.000014814            | -0.000005521 | -0.000016891 |
| 22            | 1             | -0.000004508           | -0.000003122 | -0.000001521 |
| 23            | 1             | -0.000000239           | 0.000004579  | -0.000004145 |
| 24            | 1             | 0.000003820            | -0.000003397 | 0.000002776  |

|    |   |              |              |              |
|----|---|--------------|--------------|--------------|
| 25 | 6 | -0.000000862 | 0.000001674  | -0.000005226 |
| 26 | 1 | -0.000004420 | 0.000006735  | -0.000000333 |
| 27 | 1 | -0.000004352 | 0.000002926  | 0.000003314  |
| 28 | 1 | 0.000004350  | -0.000002565 | 0.000001100  |
| 29 | 6 | -0.000002357 | -0.000017456 | 0.000010515  |
| 30 | 1 | -0.000000583 | -0.000000623 | 0.000004708  |
| 31 | 1 | 0.000004923  | -0.000004432 | 0.000005411  |
| 32 | 1 | 0.000003051  | 0.000001967  | 0.000010290  |
| 33 | 8 | -0.000012685 | -0.000012223 | -0.000024884 |
| 34 | 1 | -0.000001107 | 0.000004711  | -0.000002264 |

**Table S8.** Starting material for compound **14** geometry optimization (B3LYP/6-311++G\*\*).

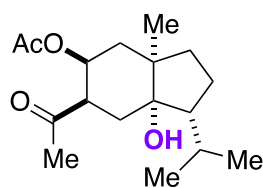

| Center Number | Atomic Number | Forces (Hartrees/Bohr) |              |              |
|---------------|---------------|------------------------|--------------|--------------|
|               |               | X                      | Y            | Z            |
| 1             | 6             | 0.000004895            | 0.000001375  | -0.000000843 |
| 2             | 6             | -0.000002462           | -0.000000015 | 0.000001846  |
| 3             | 6             | 0.000002234            | 0.000002055  | 0.000000218  |
| 4             | 6             | -0.000007764           | -0.000003800 | -0.000001398 |
| 5             | 6             | 0.000002140            | 0.000003595  | -0.000005180 |
| 6             | 6             | 0.000000300            | -0.000002166 | 0.000005644  |
| 7             | 1             | 0.000000645            | -0.000000196 | 0.000001042  |
| 8             | 1             | 0.000003091            | -0.000002414 | 0.000000096  |
| 9             | 1             | 0.000000615            | 0.000000300  | -0.000002663 |
| 10            | 1             | -0.000003357           | 0.000002534  | -0.000002593 |
| 11            | 1             | 0.000000317            | 0.000001775  | -0.000004036 |
| 12            | 1             | -0.000001121           | 0.000001982  | -0.000004807 |
| 13            | 6             | -0.000001584           | -0.000005286 | 0.000004607  |
| 14            | 1             | -0.000002903           | 0.000002703  | 0.000000358  |
| 15            | 1             | -0.000002932           | 0.000002458  | 0.000002321  |
| 16            | 6             | 0.000000287            | -0.000002796 | -0.000007356 |
| 17            | 1             | -0.000000454           | -0.000002625 | 0.000002474  |
| 18            | 6             | 0.000000414            | 0.000002835  | -0.000003406 |
| 19            | 1             | -0.000002506           | -0.000000452 | 0.000003620  |
| 20            | 1             | -0.000002411           | 0.000002873  | 0.000003267  |
| 21            | 6             | 0.000000656            | 0.000010785  | 0.000006527  |
| 22            | 1             | -0.000000569           | 0.000000180  | -0.000003574 |

|    |   |              |              |              |
|----|---|--------------|--------------|--------------|
| 23 | 1 | -0.000000594 | 0.000000050  | -0.000003489 |
| 24 | 1 | -0.000006168 | -0.000001531 | 0.000002741  |
| 25 | 8 | 0.000002170  | -0.000003895 | 0.000000273  |
| 26 | 1 | 0.000002373  | -0.000001348 | -0.000000624 |
| 27 | 6 | 0.000000045  | -0.000002252 | 0.000010980  |
| 28 | 1 | 0.000009682  | -0.000002021 | 0.000001264  |
| 29 | 6 | 0.000004166  | 0.000002888  | 0.000001901  |
| 30 | 1 | 0.000001765  | -0.000003284 | 0.000004255  |
| 31 | 1 | -0.000000116 | -0.000002772 | 0.000001549  |
| 32 | 1 | -0.000000408 | -0.000002903 | 0.000004679  |
| 33 | 6 | 0.000006362  | -0.000010311 | -0.000006519 |
| 34 | 1 | 0.000006165  | -0.000004096 | 0.000003117  |
| 35 | 1 | 0.000004124  | -0.000002486 | 0.000005907  |
| 36 | 1 | 0.000004302  | 0.000002221  | 0.000006160  |
| 37 | 6 | -0.000003127 | -0.000003422 | 0.000001110  |
| 38 | 8 | -0.000006824 | -0.000000210 | -0.000011050 |
| 39 | 6 | -0.000003283 | 0.000005554  | 0.000005307  |
| 40 | 8 | -0.000004403 | 0.000004547  | 0.000001132  |
| 41 | 6 | -0.000004887 | -0.000004119 | -0.000012951 |
| 42 | 1 | -0.000002855 | 0.000005570  | -0.000001158 |
| 43 | 1 | -0.000003932 | 0.000004042  | -0.000000640 |
| 44 | 1 | -0.000005950 | 0.000004656  | -0.000001778 |
| 45 | 8 | 0.000007003  | 0.000003671  | -0.000006644 |
| 46 | 6 | -0.000003507 | 0.000001842  | -0.000003995 |
| 47 | 1 | 0.000002617  | -0.000000765 | 0.000000149  |
| 48 | 1 | 0.000004654  | -0.000003108 | -0.000000090 |
| 49 | 1 | 0.000003094  | -0.000002218 | 0.000002250  |

---

**Table S9.** Compound **8** geometry optimization (B3LYP/6-311++G\*\*) shows intramolecular hydrogen bonding.

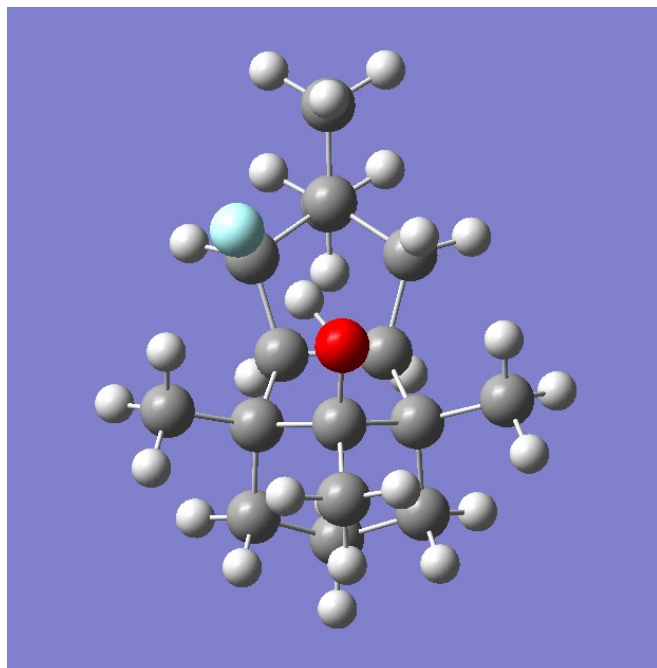

| Center Number | Atomic Number | Atomic Type | Coordinates (Angstroms) |           |           |
|---------------|---------------|-------------|-------------------------|-----------|-----------|
|               |               |             | X                       | Y         | Z         |
| 1             | 6             | 0           | -0.276126               | -1.075286 | 0.307629  |
| 2             | 6             | 0           | -0.357963               | 0.380759  | 0.888756  |
| 3             | 6             | 0           | 0.995542                | 1.075427  | 0.498373  |
| 4             | 6             | 0           | 1.117563                | -1.180387 | -0.392191 |
| 5             | 6             | 0           | 2.018846                | 0.740730  | 1.622135  |
| 6             | 6             | 0           | 2.146910                | -1.636559 | 0.675882  |
| 7             | 6             | 0           | 2.131071                | -0.760023 | 1.939931  |
| 8             | 1             | 0           | -0.303455               | -1.804368 | 1.122043  |
| 9             | 1             | 0           | 2.994504                | 1.139084  | 1.329687  |
| 10            | 1             | 0           | 3.145757                | -1.644308 | 0.230807  |
| 11            | 1             | 0           | -0.414325               | 0.358423  | 1.981091  |
| 12            | 1             | 0           | 1.729910                | 1.286629  | 2.527725  |
| 13            | 1             | 0           | 1.931613                | -2.675976 | 0.949685  |
| 14            | 1             | 0           | 3.027696                | -0.946388 | 2.539526  |
| 15            | 1             | 0           | 1.288799                | -1.057611 | 2.572979  |
| 16            | 6             | 0           | 1.427689                | 0.305770  | -0.800123 |
| 17            | 6             | 0           | 1.148071                | -2.155576 | -1.571719 |
| 18            | 1             | 0           | 2.166476                | -2.273306 | -1.954081 |
| 19            | 1             | 0           | 0.800834                | -3.146571 | -1.261553 |
| 20            | 1             | 0           | 0.523652                | -1.810185 | -2.395395 |

|    |   |   |           |           |           |
|----|---|---|-----------|-----------|-----------|
| 21 | 6 | 0 | 0.939832  | 2.603034  | 0.355612  |
| 22 | 1 | 0 | 1.948688  | 3.009506  | 0.242875  |
| 23 | 1 | 0 | 0.348003  | 2.934008  | -0.495246 |
| 24 | 1 | 0 | 0.509584  | 3.052271  | 1.256723  |
| 25 | 6 | 0 | -1.568966 | -1.250265 | -0.520469 |
| 26 | 1 | 0 | -1.920054 | -2.285689 | -0.536433 |
| 27 | 1 | 0 | -1.416979 | -0.942803 | -1.557099 |
| 28 | 6 | 0 | -1.726742 | 0.934837  | 0.441199  |
| 29 | 1 | 0 | -2.172876 | 1.625365  | 1.159368  |
| 30 | 6 | 0 | -2.600126 | -0.302687 | 0.144369  |
| 31 | 6 | 0 | -3.795825 | 0.011807  | -0.763640 |
| 32 | 1 | 0 | -4.359973 | -0.903441 | -0.965877 |
| 33 | 1 | 0 | -4.478745 | 0.724752  | -0.290598 |
| 34 | 1 | 0 | -3.475765 | 0.432756  | -1.717229 |
| 35 | 6 | 0 | -3.120910 | -0.883731 | 1.475875  |
| 36 | 1 | 0 | -3.786306 | -0.173978 | 1.977182  |
| 37 | 1 | 0 | -3.694136 | -1.794805 | 1.282869  |
| 38 | 1 | 0 | -2.319885 | -1.141085 | 2.172601  |
| 39 | 8 | 0 | 0.633277  | 0.674820  | -1.940166 |
| 40 | 1 | 0 | -0.182370 | 1.108174  | -1.663199 |
| 41 | 6 | 0 | 2.860364  | 0.569000  | -1.274140 |
| 42 | 1 | 0 | 3.028447  | 0.029847  | -2.209204 |
| 43 | 1 | 0 | 2.981700  | 1.632600  | -1.490917 |
| 44 | 1 | 0 | 3.630061  | 0.270524  | -0.564452 |
| 45 | 9 | 0 | -1.625827 | 1.704102  | -0.765270 |

---

**Table S10.** Compound **9** geometry optimization (B3LYP/6-311++G\*\*) shows intramolecular hydrogen bonding.

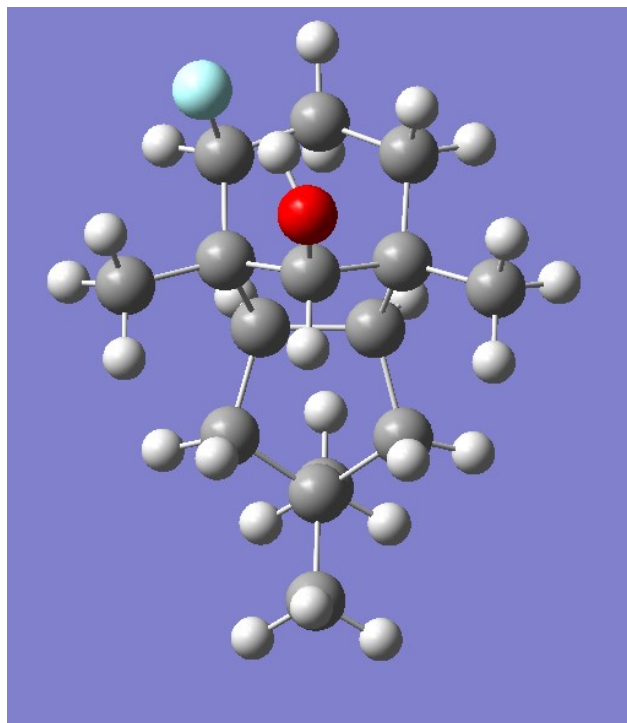

| Center Number | Atomic Number | Atomic Type | Coordinates (Angstroms) |           |           |
|---------------|---------------|-------------|-------------------------|-----------|-----------|
|               |               |             | X                       | Y         | Z         |
| 1             | 6             | 0           | -0.485260               | -0.769434 | 0.495654  |
| 2             | 6             | 0           | -0.639707               | 0.803363  | 0.575741  |
| 3             | 6             | 0           | 0.648879                | 1.389535  | -0.080360 |
| 4             | 6             | 0           | 0.884741                | -1.028947 | -0.210126 |
| 5             | 6             | 0           | 1.771556                | 1.501077  | 0.977780  |
| 6             | 6             | 0           | 1.965687                | -1.033643 | 0.891322  |
| 7             | 6             | 0           | 1.971658                | 0.204395  | 1.775797  |
| 8             | 1             | 0           | -0.468376               | -1.209019 | 1.497378  |
| 9             | 1             | 0           | 2.701756                | 1.775605  | 0.470189  |
| 10            | 1             | 0           | -0.695612               | 1.131475  | 1.617358  |
| 11            | 1             | 0           | 1.542819                | 2.321293  | 1.666338  |
| 12            | 1             | 0           | 1.884669                | -1.945303 | 1.490184  |
| 13            | 1             | 0           | 2.909907                | 0.225557  | 2.337155  |
| 14            | 1             | 0           | 1.175551                | 0.090144  | 2.517573  |
| 15            | 6             | 0           | 1.017029                | 0.254672  | -1.074192 |
| 16            | 1             | 0           | 0.243650                | 0.217354  | -1.849957 |
| 17            | 6             | 0           | 0.973673                | -2.326329 | -1.018916 |
| 18            | 1             | 0           | 1.966594                | -2.439083 | -1.457758 |
| 19            | 1             | 0           | 0.784520                | -3.199305 | -0.385535 |

|    |   |   |           |           |           |
|----|---|---|-----------|-----------|-----------|
| 20 | 1 | 0 | 0.250290  | -2.338671 | -1.835899 |
| 21 | 6 | 0 | 0.481366  | 2.743152  | -0.773188 |
| 22 | 1 | 0 | 1.428879  | 3.048945  | -1.224289 |
| 23 | 1 | 0 | -0.263238 | 2.710235  | -1.571680 |
| 24 | 1 | 0 | 0.178713  | 3.517759  | -0.061020 |
| 25 | 6 | 0 | -1.754643 | -1.264092 | -0.233554 |
| 26 | 1 | 0 | -2.064524 | -2.262180 | 0.089589  |
| 27 | 1 | 0 | -1.584228 | -1.316373 | -1.313118 |
| 28 | 6 | 0 | -1.992214 | 1.102717  | -0.109255 |
| 29 | 1 | 0 | -2.491330 | 1.980128  | 0.312345  |
| 30 | 1 | 0 | -1.849943 | 1.300487  | -1.176138 |
| 31 | 6 | 0 | -2.832944 | -0.187636 | 0.033305  |
| 32 | 6 | 0 | -3.977166 | -0.249980 | -0.985627 |
| 33 | 1 | 0 | -4.521898 | -1.196758 | -0.911090 |
| 34 | 1 | 0 | -4.697177 | 0.558130  | -0.820893 |
| 35 | 1 | 0 | -3.600674 | -0.159430 | -2.009239 |
| 36 | 6 | 0 | -3.409818 | -0.320463 | 1.455646  |
| 37 | 1 | 0 | -4.118322 | 0.487705  | 1.662760  |
| 38 | 1 | 0 | -3.944059 | -1.268944 | 1.570398  |
| 39 | 1 | 0 | -2.633052 | -0.283179 | 2.223954  |
| 40 | 8 | 0 | 2.230959  | 0.427350  | -1.788675 |
| 41 | 1 | 0 | 2.956838  | 0.065256  | -1.267680 |
| 42 | 9 | 0 | 3.258172  | -1.126771 | 0.268702  |

---

**Table S11.** Compound **13** geometry optimization (B3LYP/6-311++G\*\*) shows intramolecular hydrogen bonding.

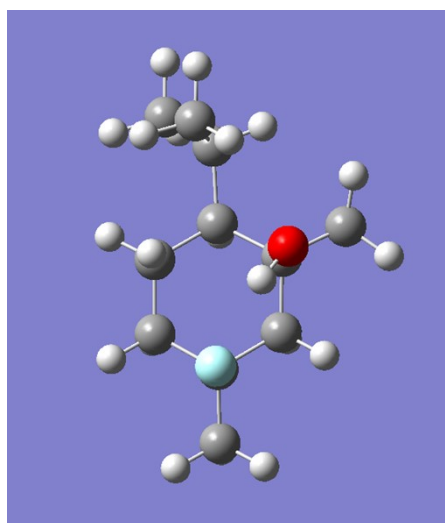



| Center<br>Number | Atomic<br>Number | Atomic<br>Type | Coordinates (Angstroms) |           |           |
|------------------|------------------|----------------|-------------------------|-----------|-----------|
|                  |                  |                | X                       | Y         | Z         |
| 1                | 6                | 0              | 2.084107                | -0.354771 | -0.076989 |
| 2                | 6                | 0              | 1.234710                | -1.605653 | -0.278073 |
| 3                | 6                | 0              | -0.205341               | -1.413449 | 0.208727  |
| 4                | 6                | 0              | -0.885750               | -0.200998 | -0.453843 |
| 5                | 6                | 0              | -0.068277               | 1.102345  | -0.173830 |
| 6                | 6                | 0              | 1.395835                | 0.891935  | -0.632009 |
| 7                | 1                | 0              | -0.774017               | -2.323664 | 0.000408  |
| 8                | 1                | 0              | 1.238705                | -1.844554 | -1.348503 |
| 9                | 1                | 0              | 1.713032                | -2.443691 | 0.238233  |
| 10               | 1                | 0              | -0.806089               | -0.348335 | -1.541548 |
| 11               | 1                | 0              | 1.416488                | 0.821000  | -1.725091 |
| 12               | 1                | 0              | 1.979435                | 1.775756  | -0.355780 |
| 13               | 1                | 0              | -0.204388               | -1.294831 | 1.295712  |
| 14               | 6                | 0              | -0.639007               | 2.315641  | -0.913125 |
| 15               | 1                | 0              | -1.585261               | 2.626194  | -0.468983 |
| 16               | 1                | 0              | 0.053385                | 3.157044  | -0.831504 |
| 17               | 1                | 0              | -0.802614               | 2.098267  | -1.972325 |
| 18               | 6                | 0              | -2.410668               | -0.116340 | -0.153112 |
| 19               | 1                | 0              | -2.754609               | 0.857607  | -0.515160 |
| 20               | 6                | 0              | -2.781696               | -0.203309 | 1.336614  |
| 21               | 1                | 0              | -2.260251               | 0.552436  | 1.923715  |
| 22               | 1                | 0              | -3.859183               | -0.056291 | 1.460662  |
| 23               | 1                | 0              | -2.540813               | -1.186710 | 1.752549  |
| 24               | 6                | 0              | -3.187526               | -1.173465 | -0.957900 |
| 25               | 1                | 0              | -4.264428               | -1.056653 | -0.804628 |
| 26               | 1                | 0              | -2.993016               | -1.085594 | -2.031459 |
| 27               | 1                | 0              | -2.927180               | -2.191721 | -0.652450 |
| 28               | 6                | 0              | 3.512350                | -0.509583 | -0.570521 |
| 29               | 1                | 0              | 4.095357                | 0.385734  | -0.343412 |
| 30               | 1                | 0              | 3.988864                | -1.366815 | -0.089387 |
| 31               | 1                | 0              | 3.526993                | -0.667685 | -1.651960 |
| 32               | 8                | 0              | -0.096817               | 1.466222  | 1.217786  |
| 33               | 1                | 0              | 0.574473                | 0.955068  | 1.685471  |
| 34               | 9                | 0              | 2.185247                | -0.165161 | 1.357501  |

**Table S12.** Starting material for compound **21** geometry optimization (B3LYP/6-311++G\*\*) shows hydroxy group in a suboptimal position.

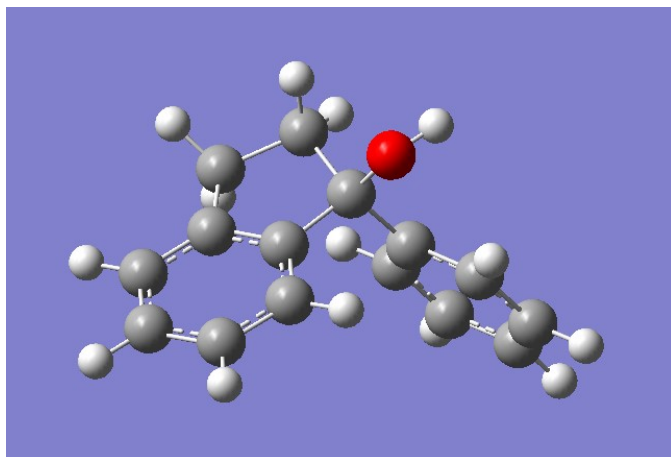

| Center Number | Atomic Number | Forces (Hartrees/Bohr) |              |              |
|---------------|---------------|------------------------|--------------|--------------|
|               |               | X                      | Y            | Z            |
| 1             | 6             | 0.000008198            | -0.000004749 | 0.000000703  |
| 2             | 6             | 0.000003891            | 0.000020685  | -0.000006828 |
| 3             | 6             | 0.000000177            | -0.000000302 | -0.000000384 |
| 4             | 6             | 0.000005237            | -0.000001930 | 0.000007244  |
| 5             | 6             | -0.000006581           | 0.000002370  | 0.000003846  |
| 6             | 6             | -0.000003810           | 0.000008267  | 0.000004048  |
| 7             | 6             | 0.000022641            | -0.000028546 | 0.000007367  |
| 8             | 6             | -0.000056203           | 0.000036975  | -0.000009946 |
| 9             | 6             | 0.000031122            | -0.000022348 | -0.000011698 |
| 10            | 1             | -0.000000441           | 0.000001069  | 0.000002475  |
| 11            | 1             | 0.000002956            | 0.000002410  | 0.000004628  |
| 12            | 1             | 0.000007379            | 0.000002944  | 0.000004397  |
| 13            | 1             | 0.000001670            | -0.000000493 | 0.000001093  |
| 14            | 1             | 0.000001883            | 0.000001055  | -0.000011985 |
| 15            | 1             | -0.000002165           | -0.000000092 | 0.000001811  |
| 16            | 1             | 0.000013350            | -0.000005497 | -0.000003986 |
| 17            | 1             | -0.000000796           | 0.000009882  | -0.000006496 |
| 18            | 8             | -0.000000202           | -0.000007348 | 0.000015984  |
| 19            | 1             | -0.000008388           | 0.000011194  | -0.000005039 |
| 20            | 6             | -0.000036392           | 0.000007843  | -0.000000202 |
| 21            | 6             | 0.000029886            | -0.000011690 | 0.000030391  |
| 22            | 6             | 0.000005806            | 0.000004093  | -0.000010757 |
| 23            | 6             | -0.000001728           | 0.000004829  | -0.000039702 |
| 24            | 1             | -0.000004864           | 0.000008212  | -0.000003036 |
| 25            | 6             | 0.000019429            | -0.000007030 | 0.000013865  |
| 26            | 1             | -0.000002502           | -0.000003240 | 0.000003513  |
| 27            | 6             | -0.000028676           | -0.000011139 | 0.000013716  |
| 28            | 1             | -0.000000668           | -0.000010023 | 0.000004473  |
| 29            | 1             | -0.000004843           | -0.000004203 | -0.000005050 |

30 1 0.00004635 -0.000003197 -0.000004447

---

**Table S13.** Isodesmic equation data for Scheme 3 within manuscript.

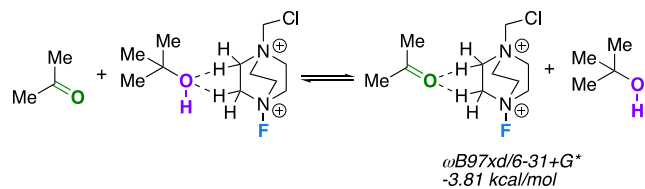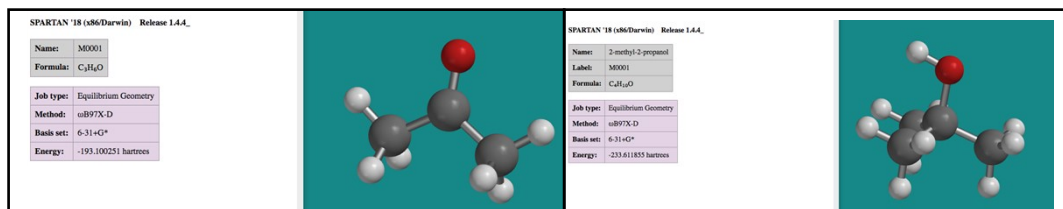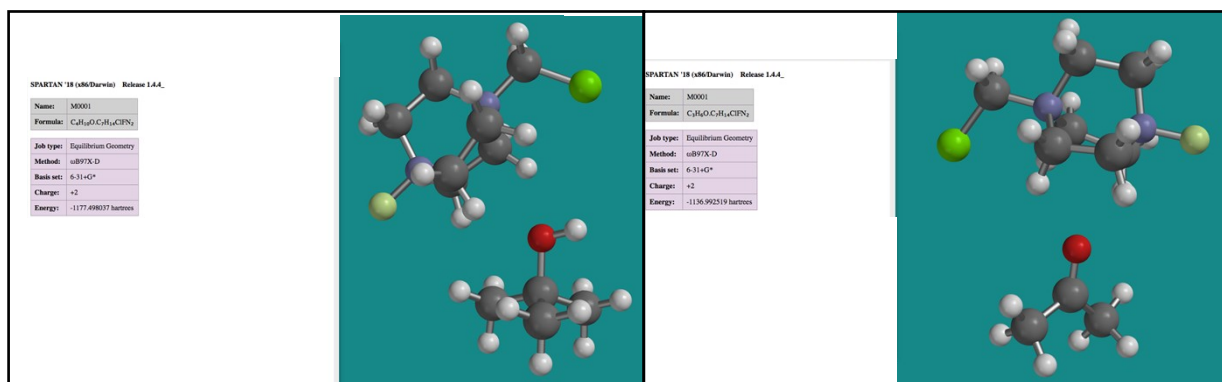

# Mass Spectral Data

## Elemental Composition Report

Page 1

### Single Mass Analysis

Tolerance = 100.0 PPM / DBE: min = -1.5, max = 50.0

Element prediction: Off

Monoisotopic Mass, Odd and Even Electron Ions

1 formula(e) evaluated with 1 results within limits (up to 50 best isotopic matches for each mass)

Elements Used:

C: 13-13 H: 14-76 O: 1-1 Cl: 1-1

Lectka\_Stefan\_SAH-K-SM\_06232021\_LIFDI 190 (3.167)

TOF MS FD+

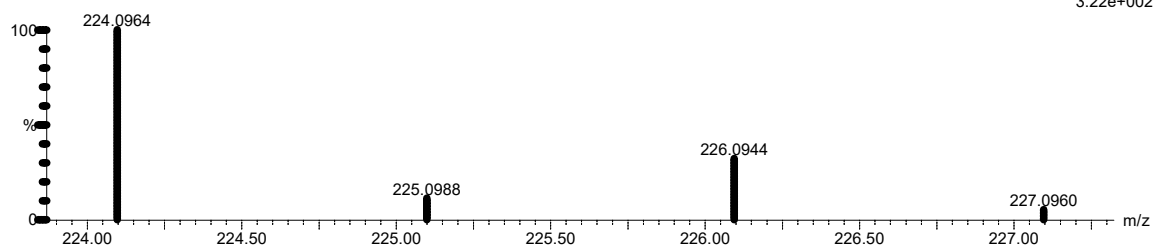

Minimum: -1.5  
Maximum: 5.0 100.0 50.0

| Mass     | Calc. Mass | mDa  | PPM  | DBE | i-FIT | Formula      |
|----------|------------|------|------|-----|-------|--------------|
| 224.0964 | 224.0968   | -0.4 | -1.8 | 5.0 | 1.4   | C13 H17 O Cl |

Fig. S75. High-resolution mass spectrum of compound 5.

## Single Mass Analysis

Tolerance = 100.0 PPM / DBE: min = -1.5, max = 50.0

Element prediction: Off

Monoisotopic Mass, Odd and Even Electron Ions

2 formula(e) evaluated with 1 results within limits (up to 50 best isotopic matches for each mass)

Elements Used:

C: 13-17 H: 10-76 O: 1-1 F: 1-1 Cl: 1-2

Lectka\_Stefan\_SAH\_K\_Fluoro\_06232021-GCMS 488 (10.194)

TOF MS EI+

4.40e+002

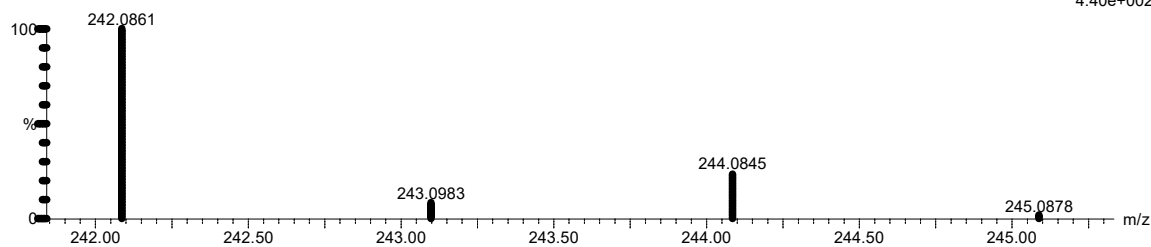

Minimum: -1.5  
Maximum: 5.0 100.0 50.0

| Mass     | Calc. Mass | mDa  | PPM  | DBE | i-FIT | Formula        |
|----------|------------|------|------|-----|-------|----------------|
| 242.0861 | 242.0874   | -1.3 | -5.4 | 5.0 | 10.8  | C13 H16 O F Cl |

Fig. S76. High-resolution mass spectrum of compound 6.

## Single Mass Analysis

Tolerance = 100.0 PPM / DBE: min = -1.5, max = 50.0

Element prediction: Off

Monoisotopic Mass, Odd and Even Electron Ions

3 formula(e) evaluated with 1 results within limits (up to 50 best isotopic matches for each mass)

Elements Used:

C: 13-17 H: 10-76 O: 1-1 F: 1-1

Lectka\_Stefan\_SAH\_D\_Fluoro\_06232021-GCMS 457 (9.678)

TOF MS EI+

5.55e+002

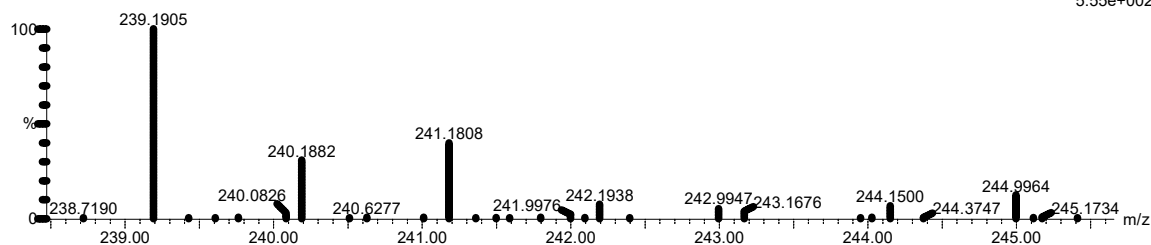

Minimum: -1.5  
Maximum: 5.0 100.0 50.0

| Mass     | Calc. Mass | mDa  | PPM  | DBE | i-FIT | Formula     |
|----------|------------|------|------|-----|-------|-------------|
| 240.1882 | 240.1889   | -0.7 | -2.9 | 3.0 | 101.8 | C15 H25 O F |

Fig. S77. High-resolution mass spectrum of compound 7.

T: FTMS + p ESI Full ms [100.0000-1500.0000]

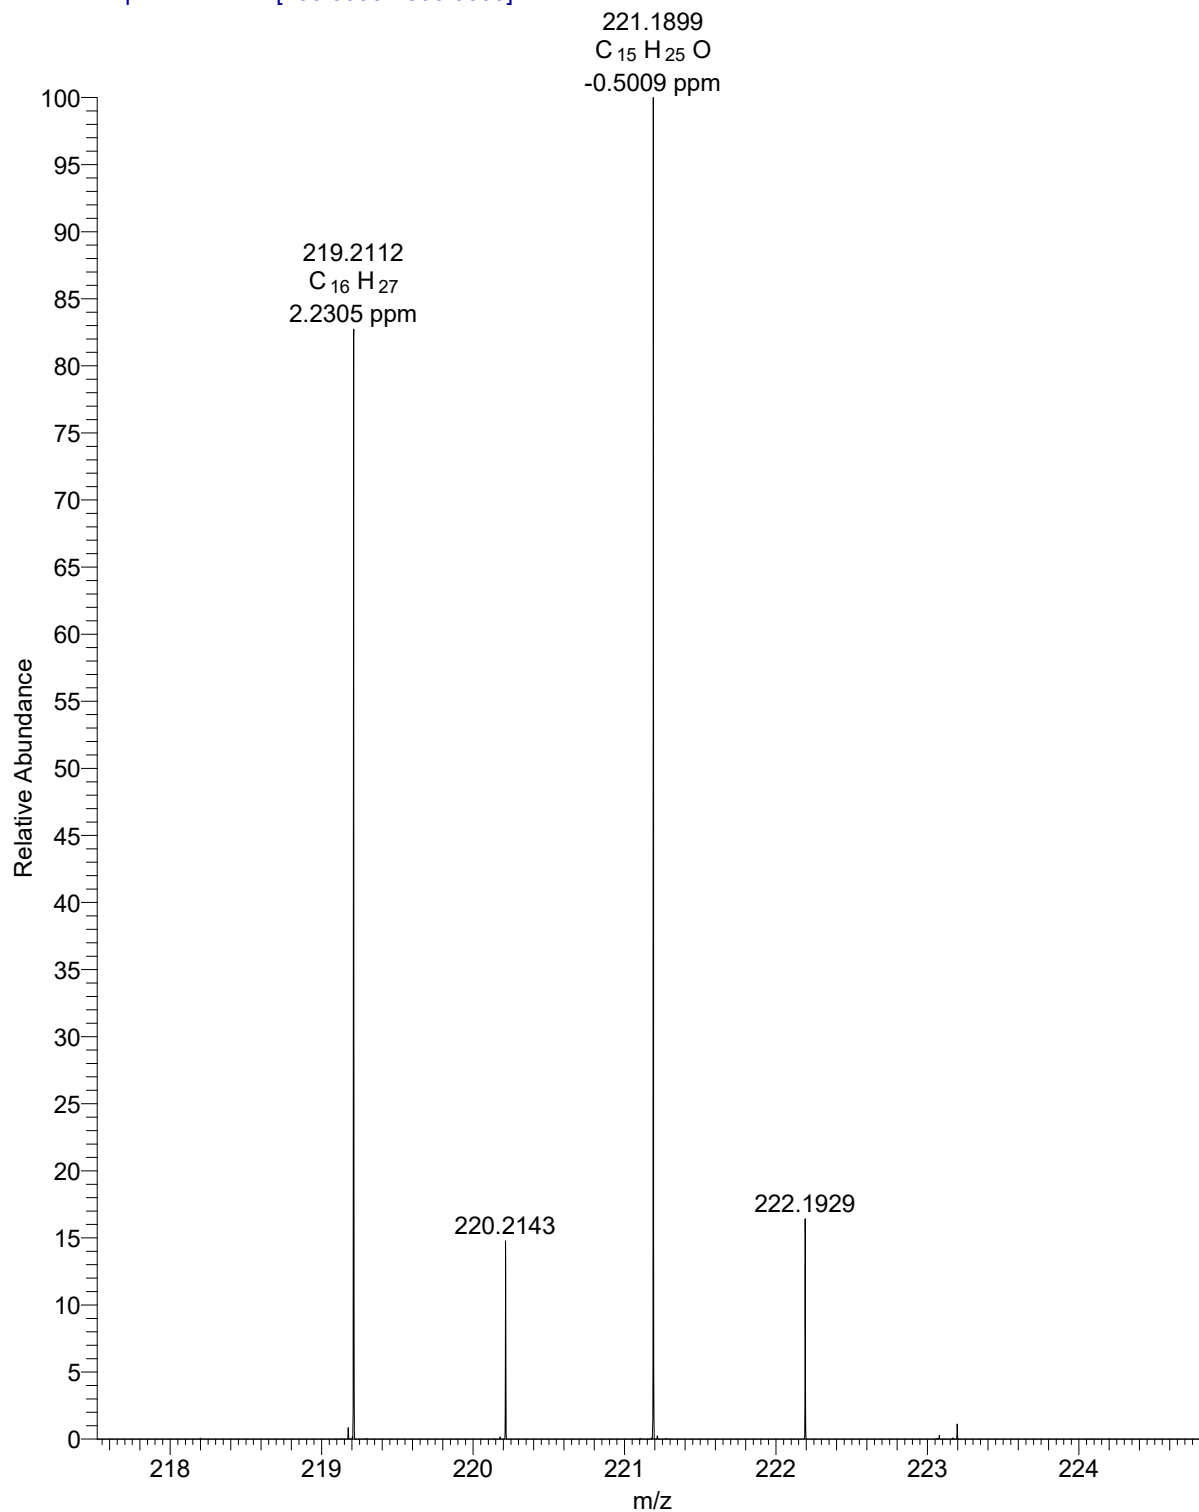

**Fig. S78.** High-resolution mass spectrum of the starting material for compound **8**.

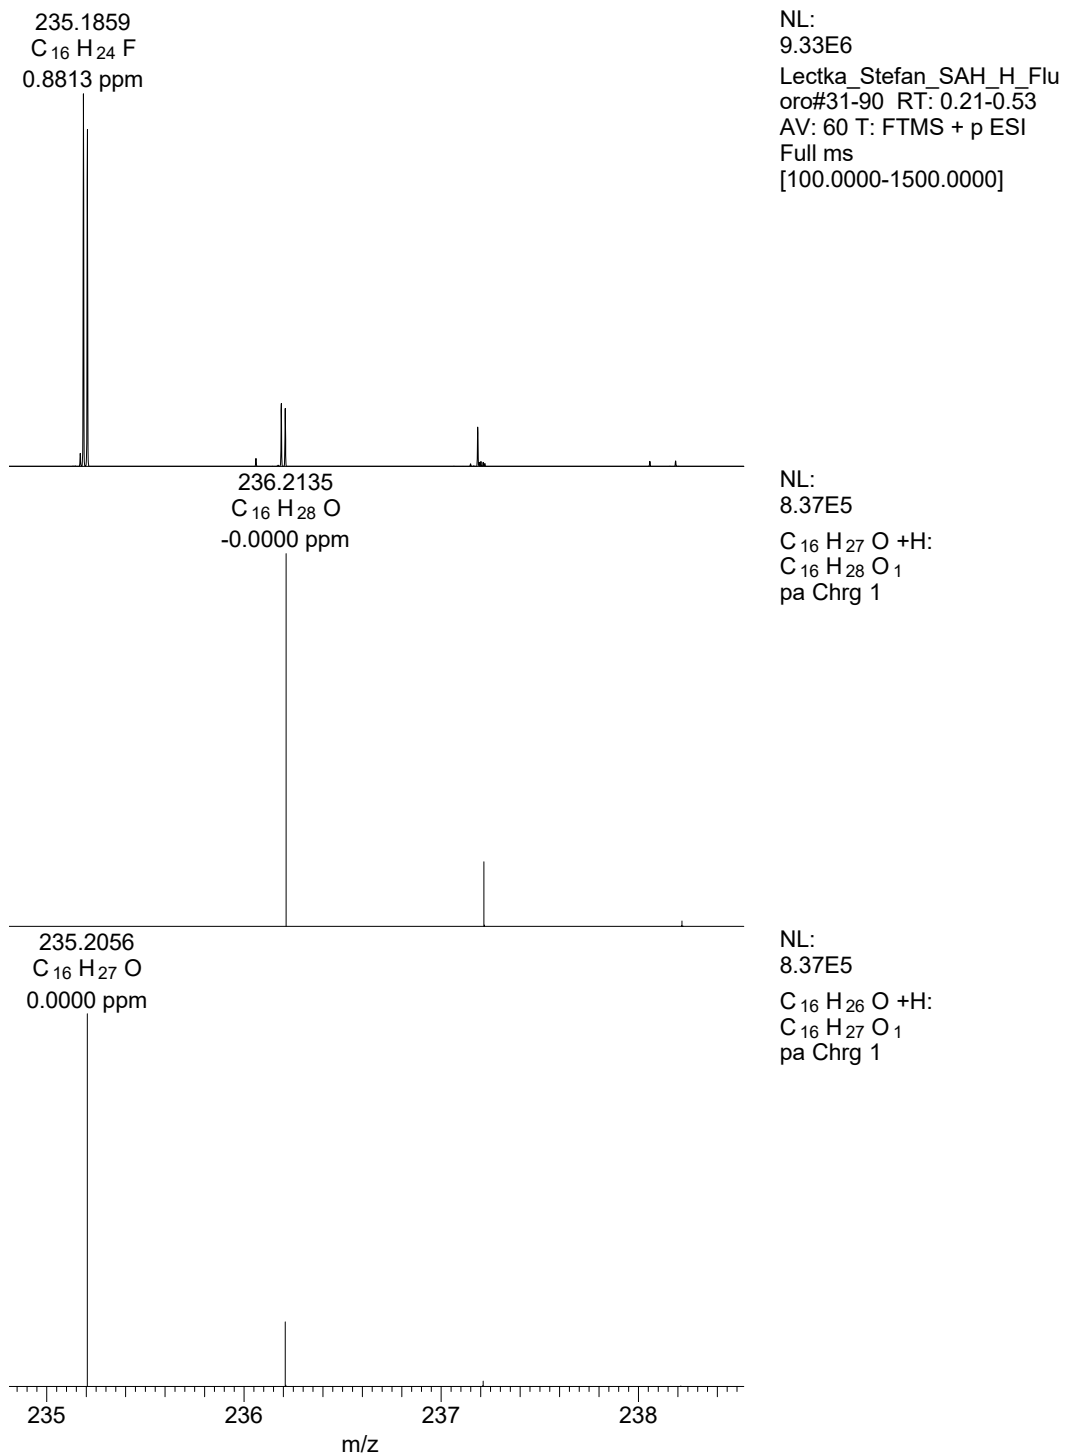

**Fig. S79.** High-resolution mass spectrum of compound **8**.

## Elemental Composition Report

Page 1

## Single Mass Analysis

Tolerance = 100.0 PPM / DBE: min = -1.5, max = 50.0

Element prediction: Off

Monoisotopic Mass, Odd and Even Electron Ions

3 formula(e) evaluated with 1 results within limits (up to 50 best isotopic matches for each mass)

Elements Used:

C: 13-17 H: 10-76 O: 1-1

Lectka\_Stefan\_SAH\_E\_SM\_06232021-GCMS 447 (9.509)

TOF MS EI+

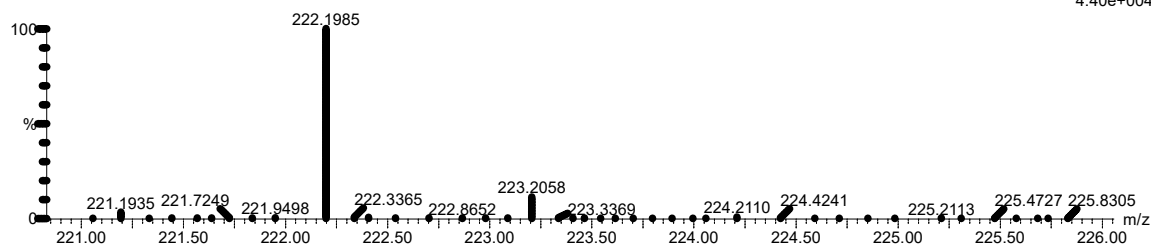

Minimum: -1.5  
Maximum: 5.0 100.0 50.0

| Mass     | Calc. Mass | mDa | PPM | DBE | i-FIT | Formula   |
|----------|------------|-----|-----|-----|-------|-----------|
| 222.1985 | 222.1984   | 0.1 | 0.5 | 3.0 | 482.0 | C15 H26 O |

Fig. S80. High-resolution mass spectrum of the starting material for compound 9.

## Elemental Composition Report

Page 1

## Single Mass Analysis

Tolerance = 100.0 PPM / DBE: min = -1.5, max = 50.0

Element prediction: Off

Monoisotopic Mass, Odd and Even Electron Ions

3 formula(e) evaluated with 1 results within limits (up to 50 best isotopic matches for each mass)

Elements Used:

C: 13-17 H: 10-76 O: 1-1 F: 1-1

Lectka\_Stefan\_SAH\_E\_Fluoro\_06232021-GCMS 438 (9.359)

TOF MS EI+

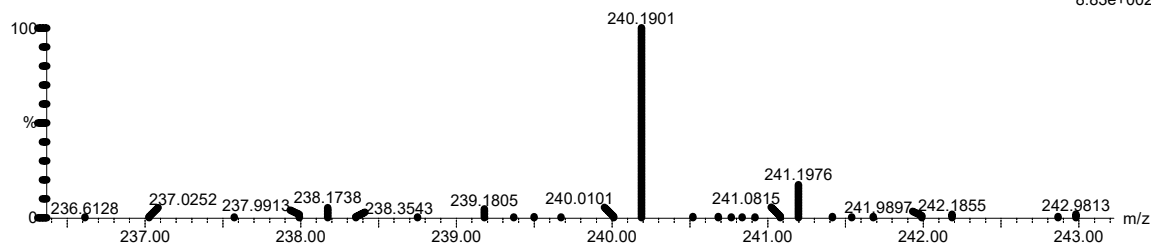

Minimum: -1.5  
Maximum: 5.0 100.0 50.0

| Mass     | Calc. Mass | mDa | PPM | DBE | i-FIT | Formula     |
|----------|------------|-----|-----|-----|-------|-------------|
| 240.1901 | 240.1889   | 1.2 | 5.0 | 3.0 | 0.5   | C15 H25 O F |

Fig. S81. High-resolution mass spectrum of compound 9.



T: FTMS + p ESI Full ms [100.0000-1500.0000]

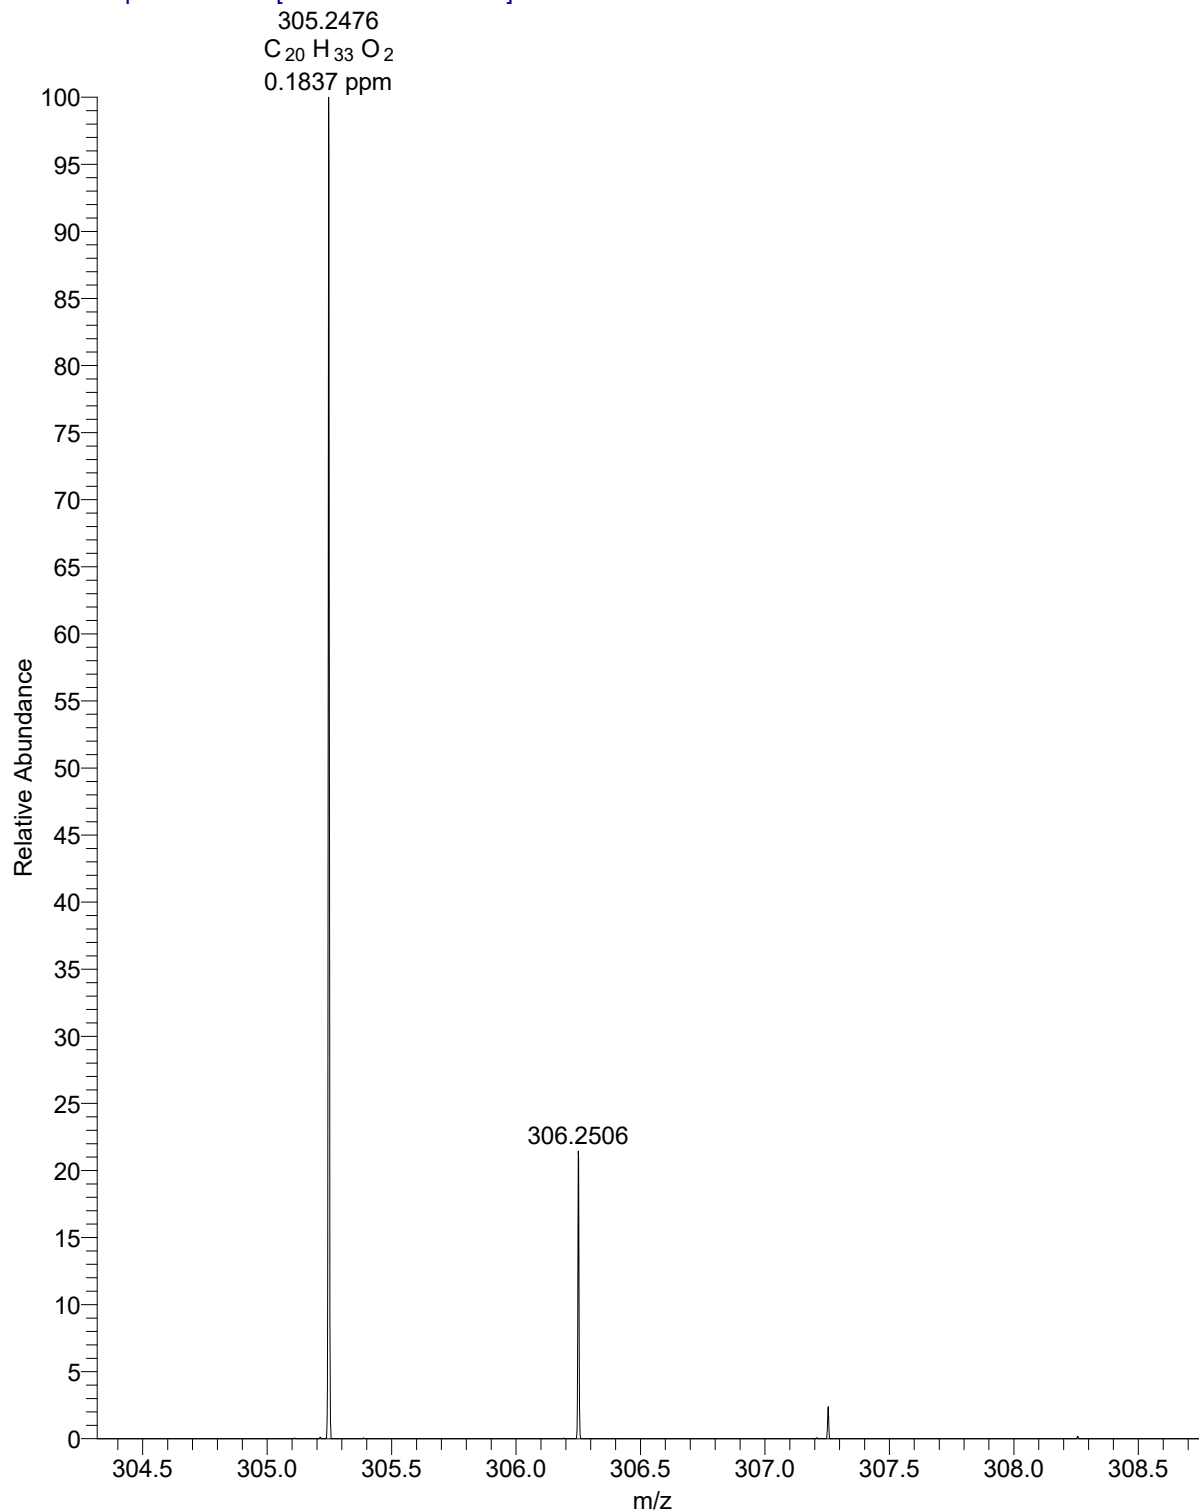

**Fig. S82.** High resolution mass spectrum of the starting material for compound **10**.

T: FTMS + p ESI Full ms [100.0000-1500.0000]

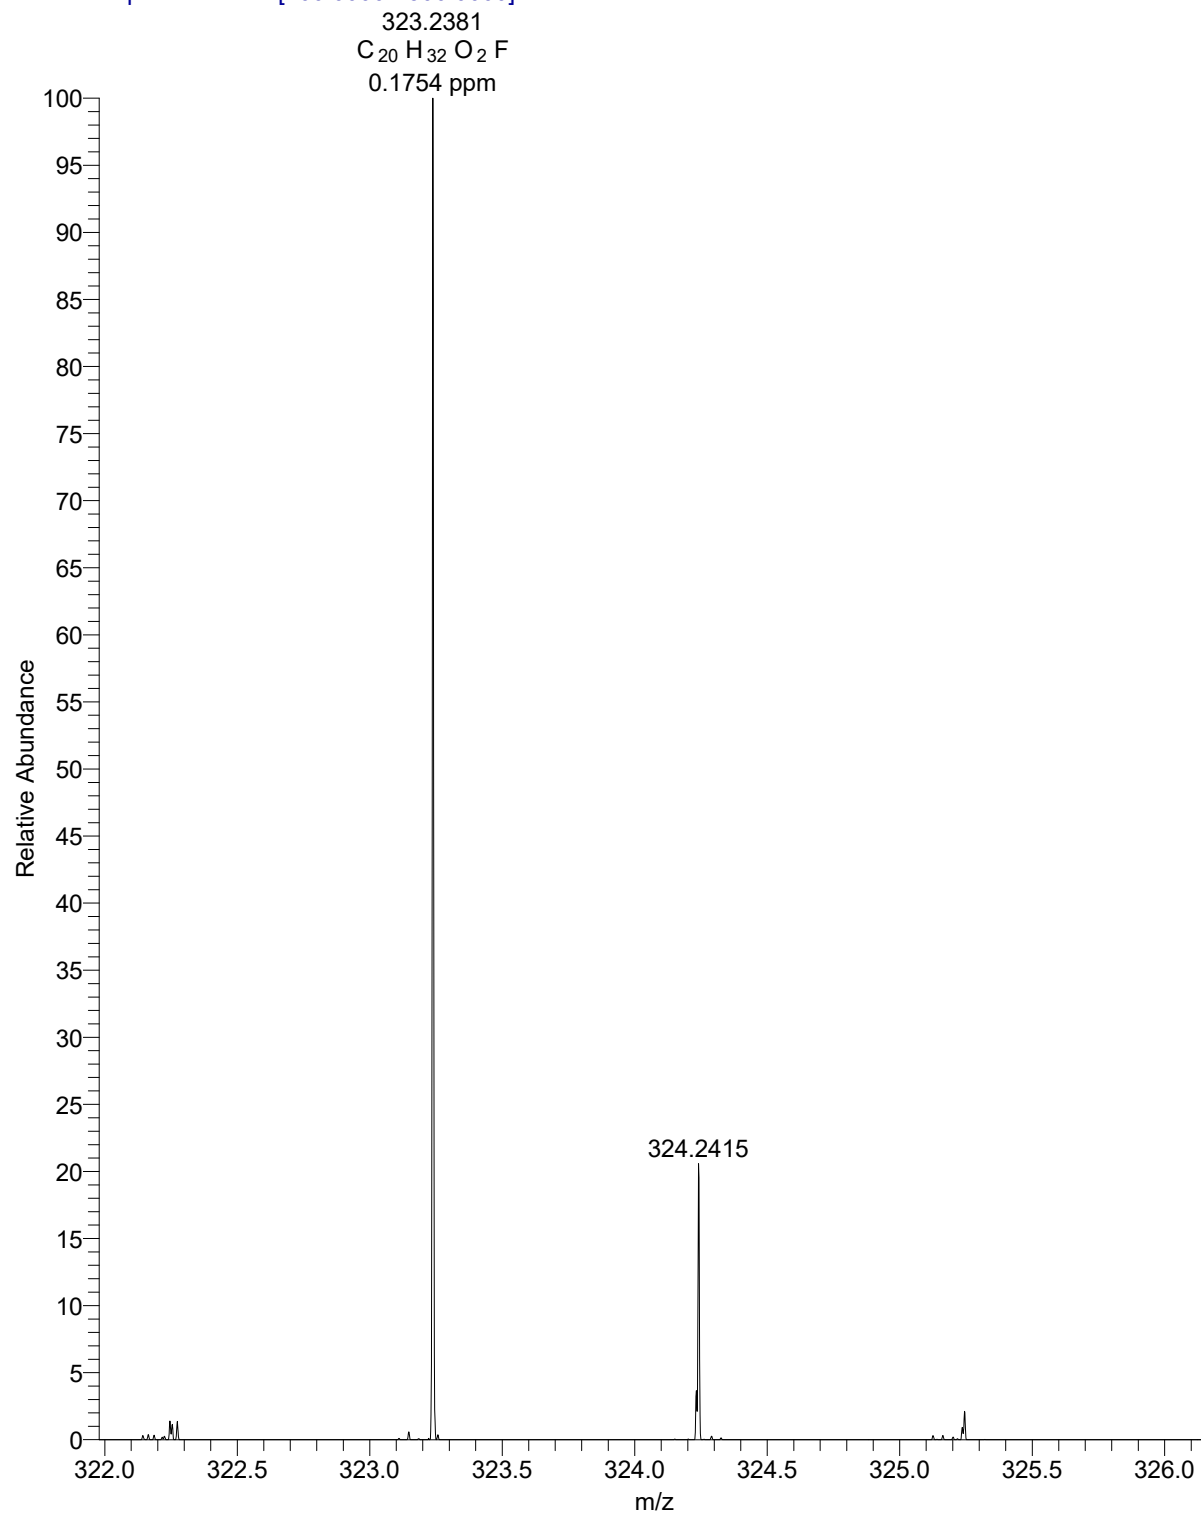

**Fig. S83.** High-resolution mass spectrum of compound **10**.

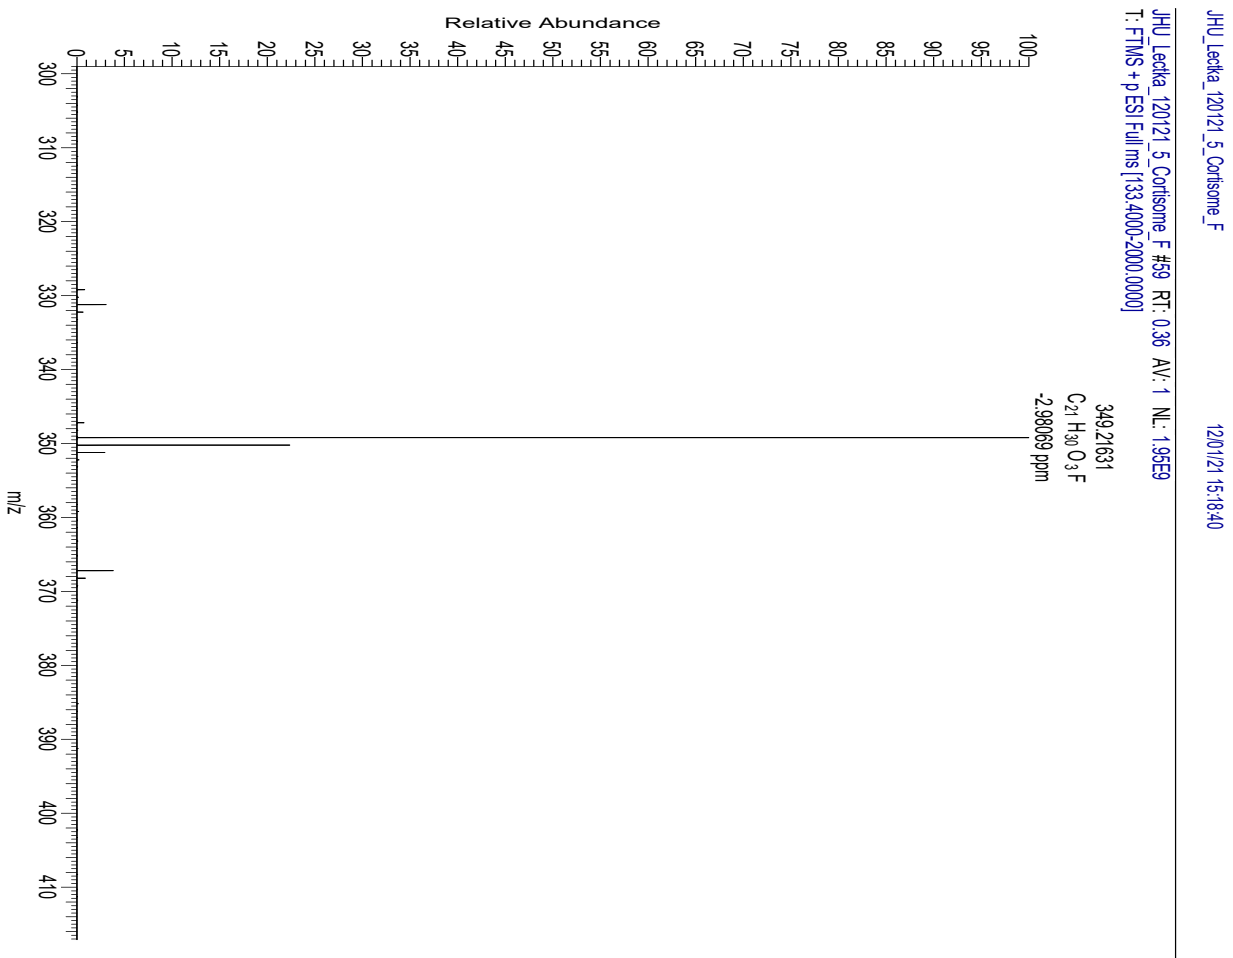

**Fig. S84.** High-resolution mass spectrum of compound **11**.

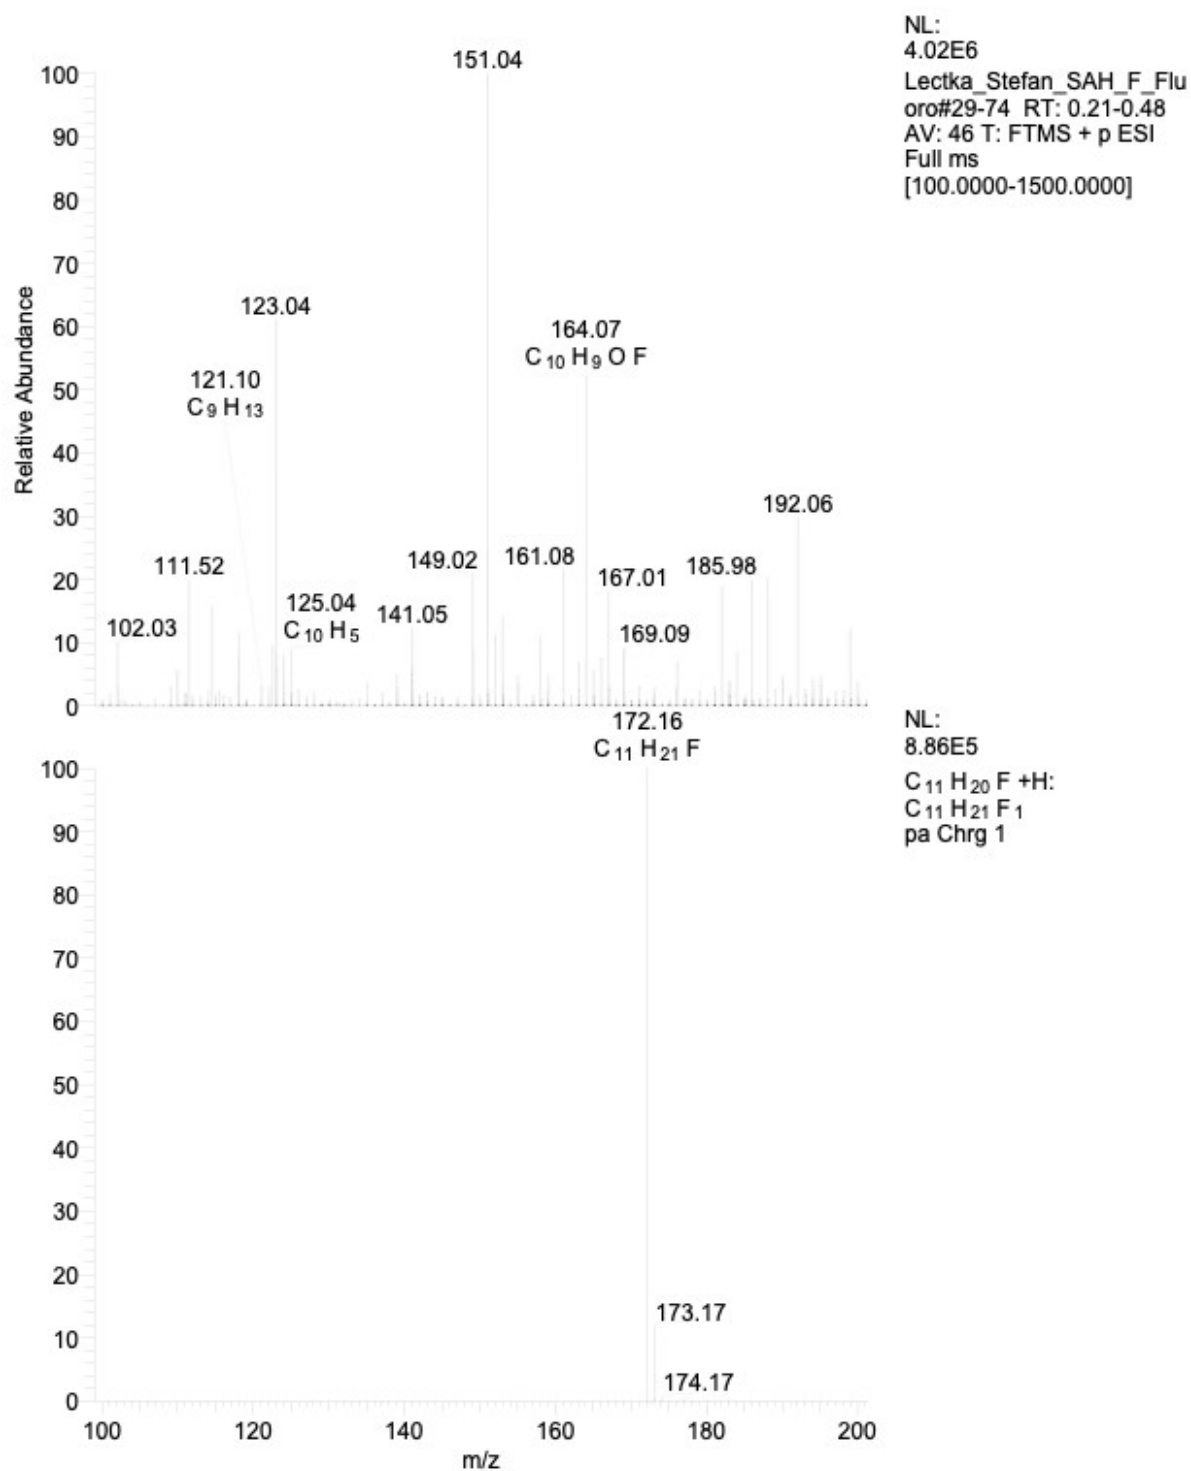

Fig. S85. Mass spectrum of compound 13.

## Single Mass Analysis

Tolerance = 100.0 PPM / DBE: min = -1.5, max = 50.0

Element prediction: Off

Monoisotopic Mass, Odd and Even Electron Ions

2 formula(e) evaluated with 1 results within limits (up to 50 best isotopic matches for each mass)

Elements Used:

C: 13-17 H: 14-76 O: 4-4

Lectka\_Stefan\_SAH-M-SM\_06232021\_LIFDI\_2 62 (1.034)

TOF MS FD+

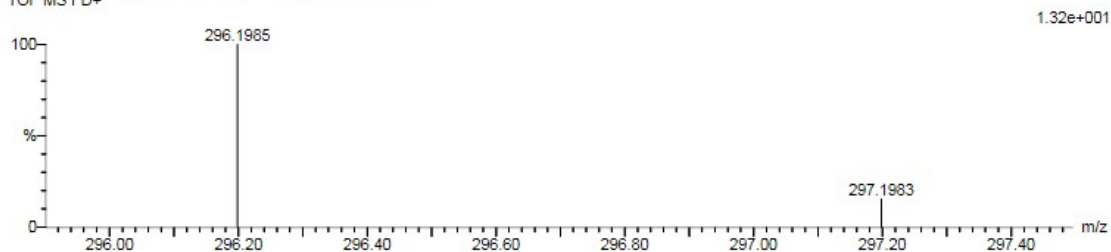

|          |            |      |       |      |           |            |
|----------|------------|------|-------|------|-----------|------------|
| Minimum: |            |      |       | -1.5 |           |            |
| Maximum: |            | 5.0  | 100.0 | 50.0 |           |            |
| Mass     | Calc. Mass | mDa  | PPM   | DBE  | i-FIT     | Formula    |
| 296.1985 | 296.1988   | -0.3 | -1.0  | 4.0  | 2773012.8 | C17 H28 O4 |

**Fig. S86.** High-resolution mass spectrum of starting material for compound **14**.

T: FTMS + p ESI Full ms [100.0000-1500.0000]

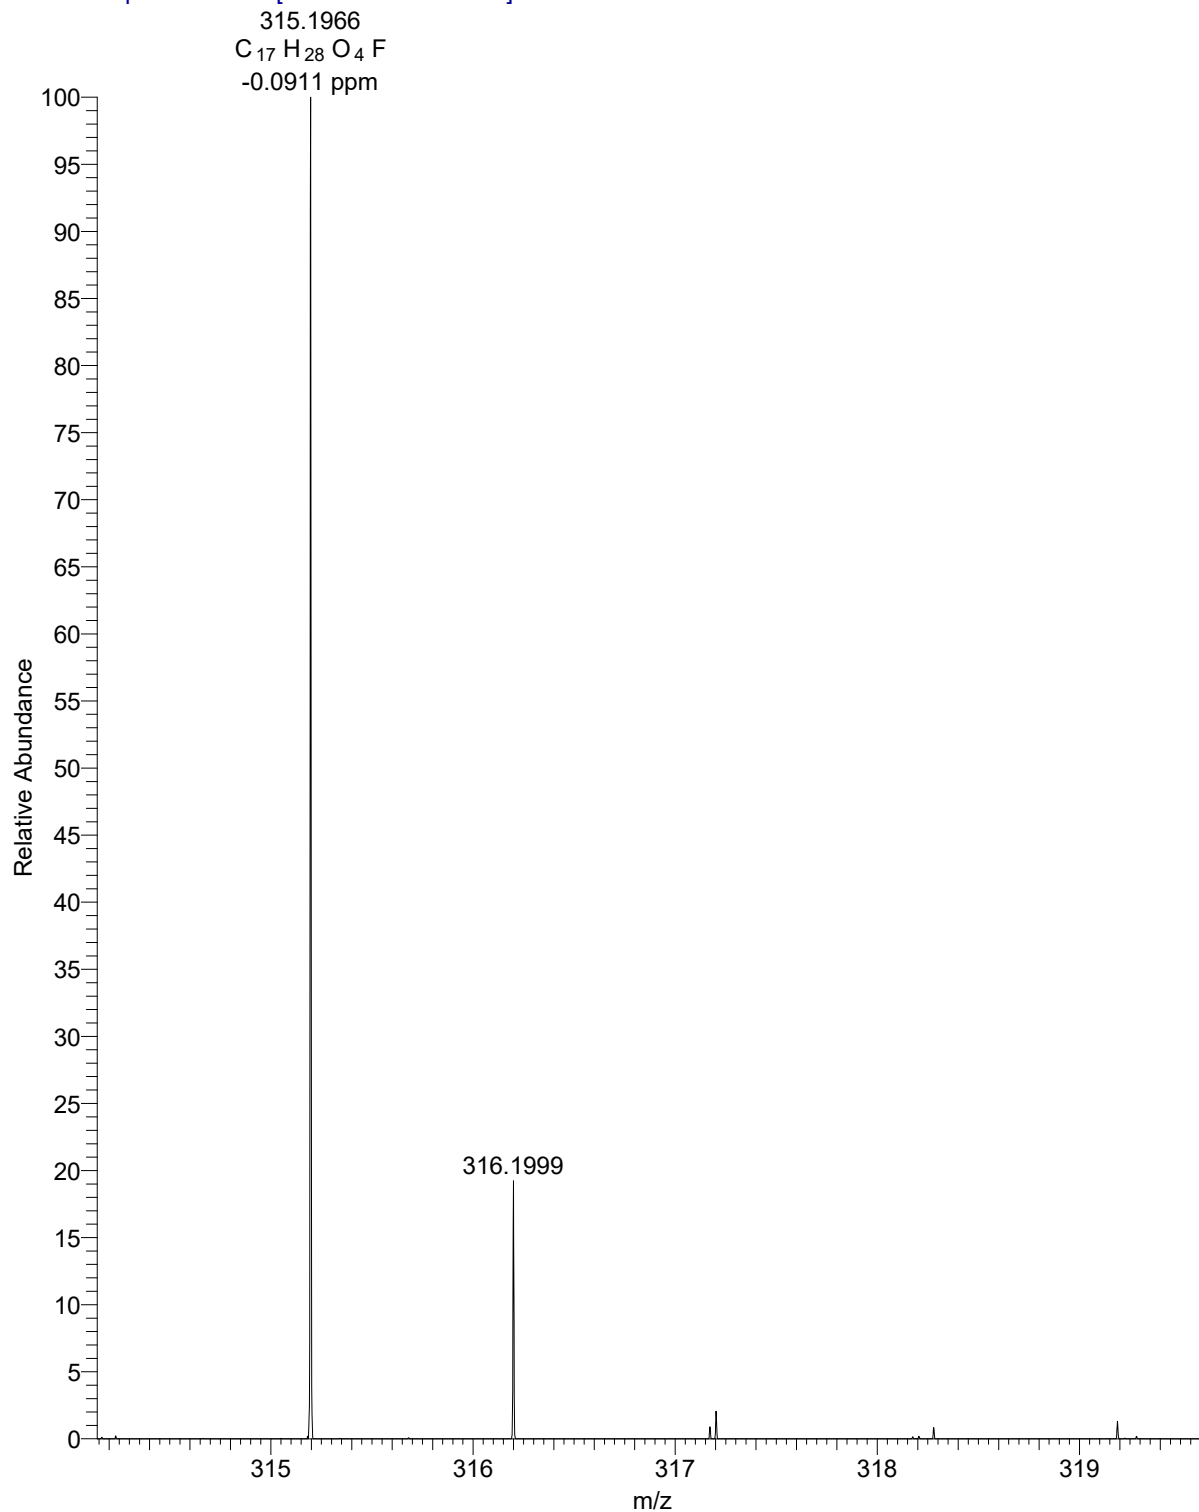

**Fig. S87.** High-resolution mass spectrum of compound **14**.

T: FTMS + p ESI Full ms [100.0000-1500.0000]

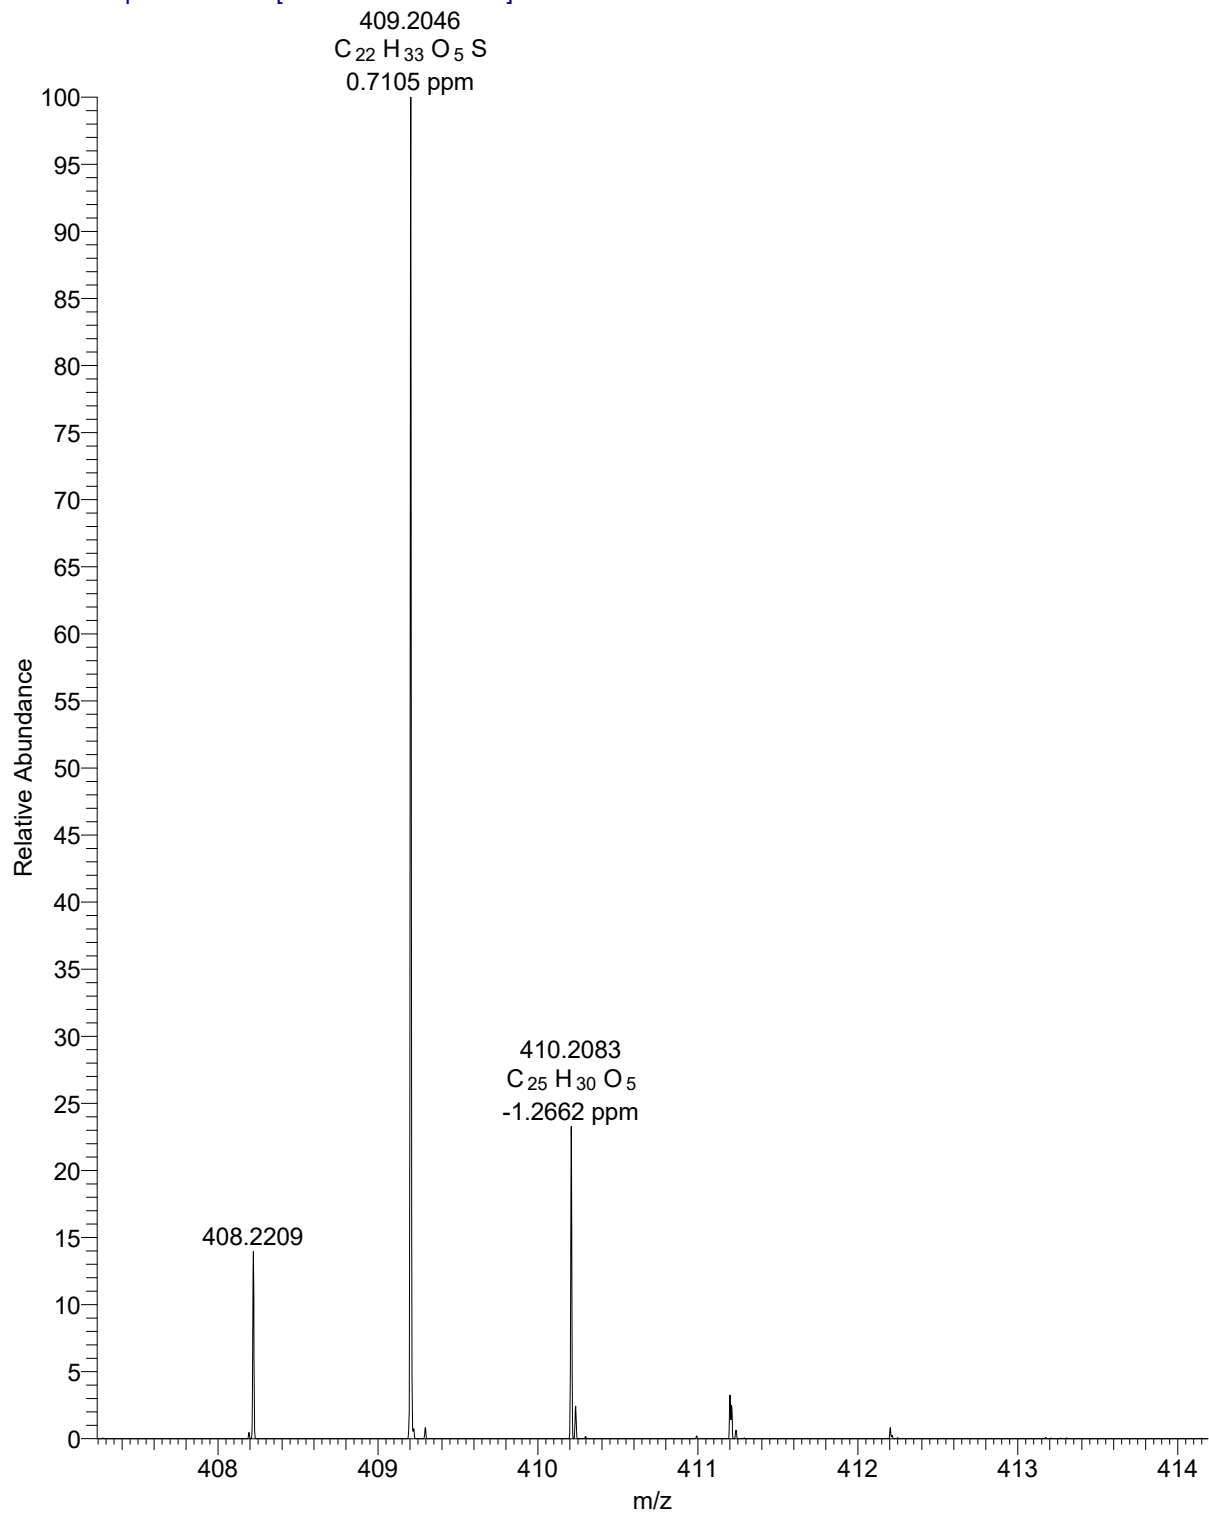

**Fig. S88.** High resolution mass spectrum of the starting material for compound **15**.

T: FTMS + p ESI Full ms [100.0000-1500.0000]

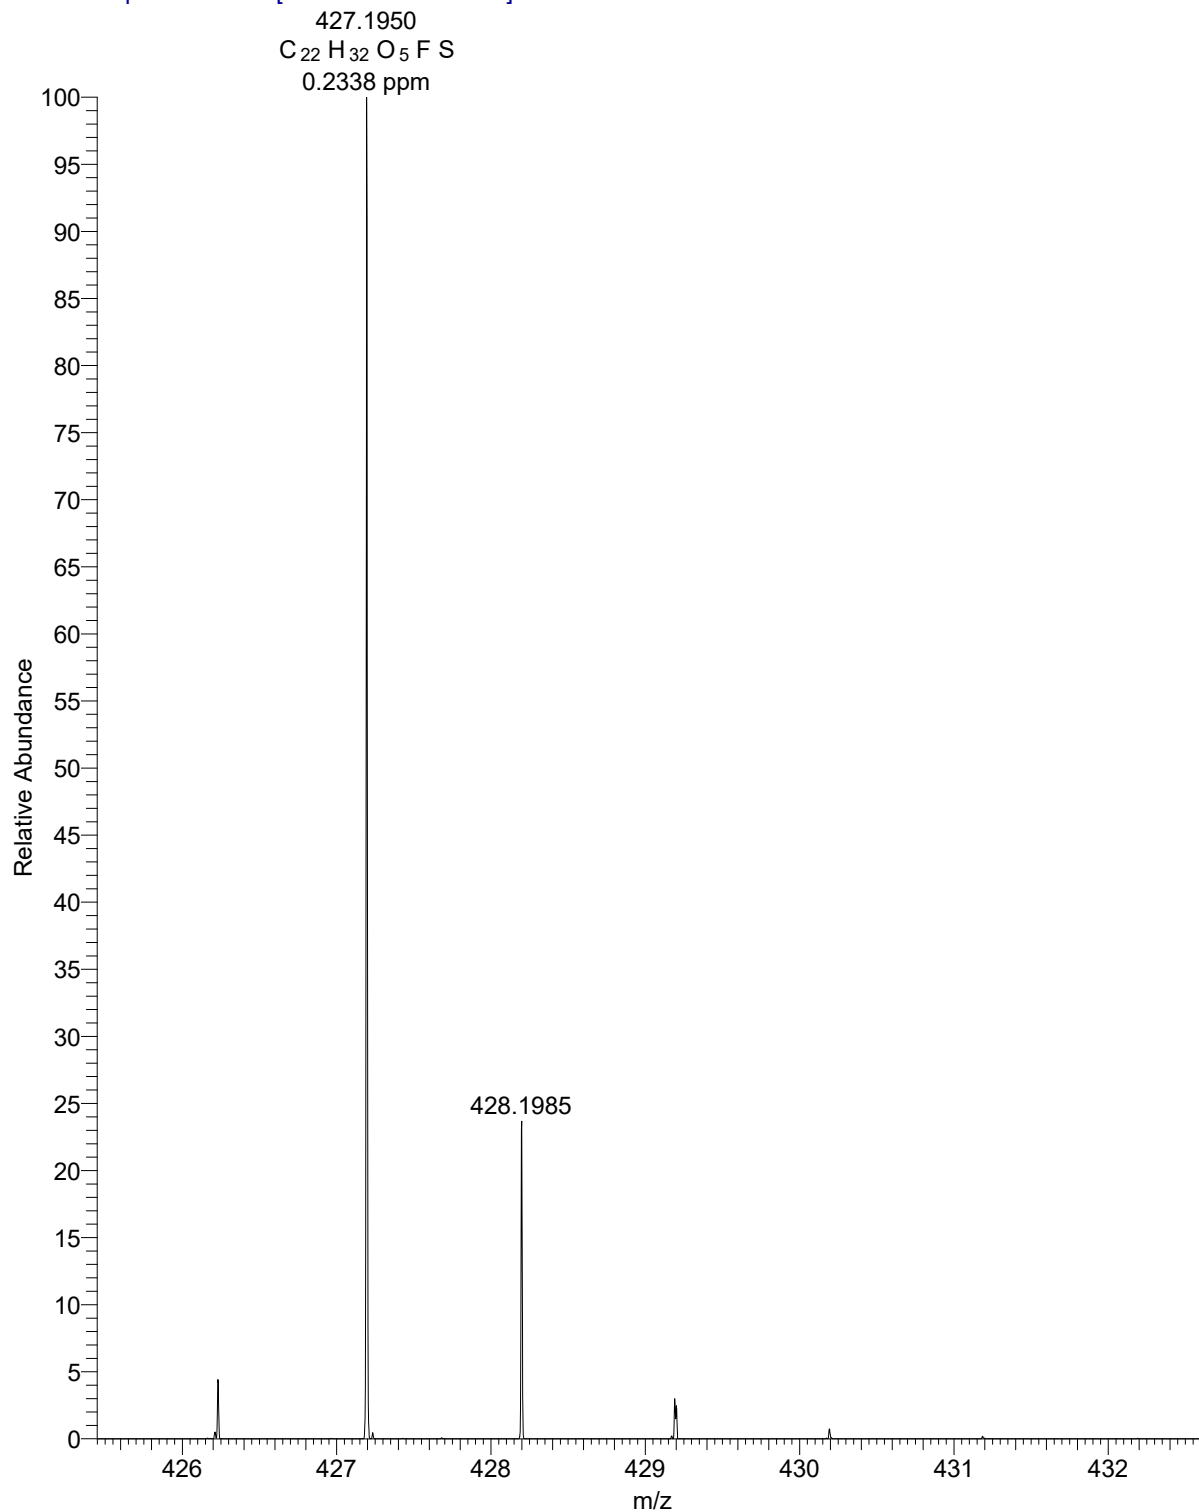

**Fig. S89.** High resolution mass spectrum of compound **15**.



Lectka\_Stefan\_SAH\_G\_SM #31-85 RT: 0.22-0.51 AV: 55 NL: 9.68E7  
T: FTMS + p ESI Full ms [100.0000-1500.0000]

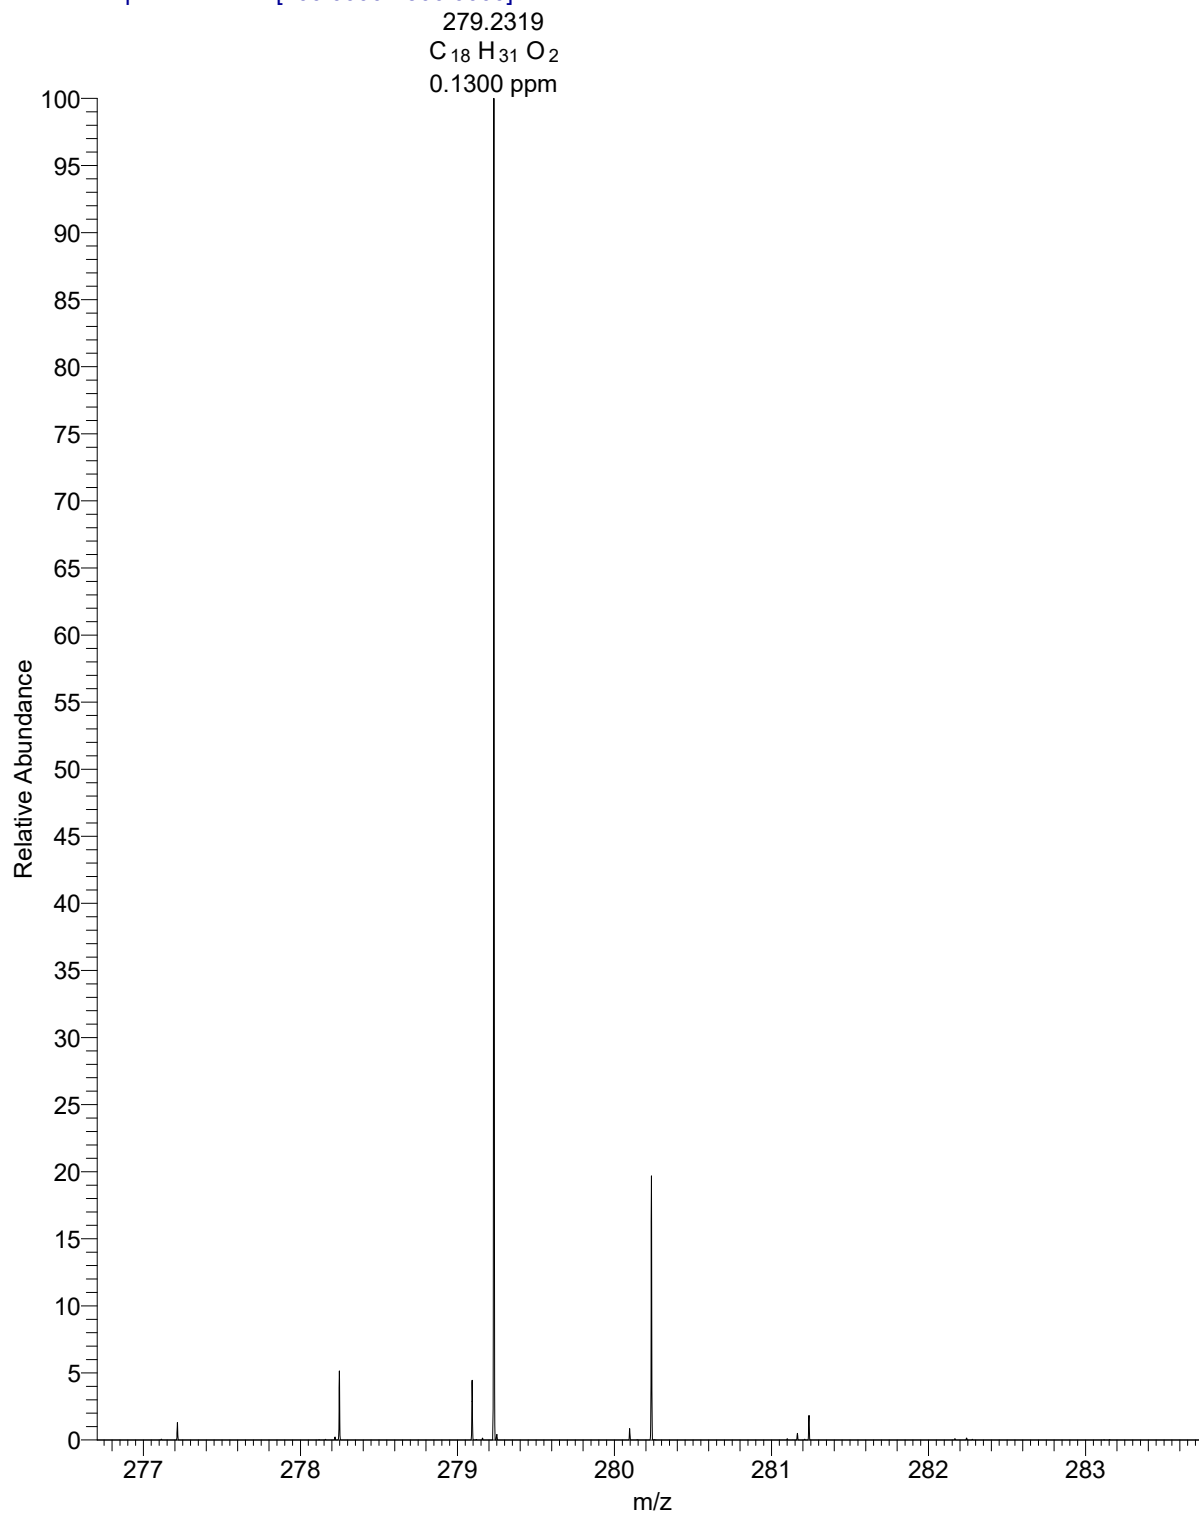

**Fig. S90.** High-resolution mass spectrum of the starting material for compound 16.

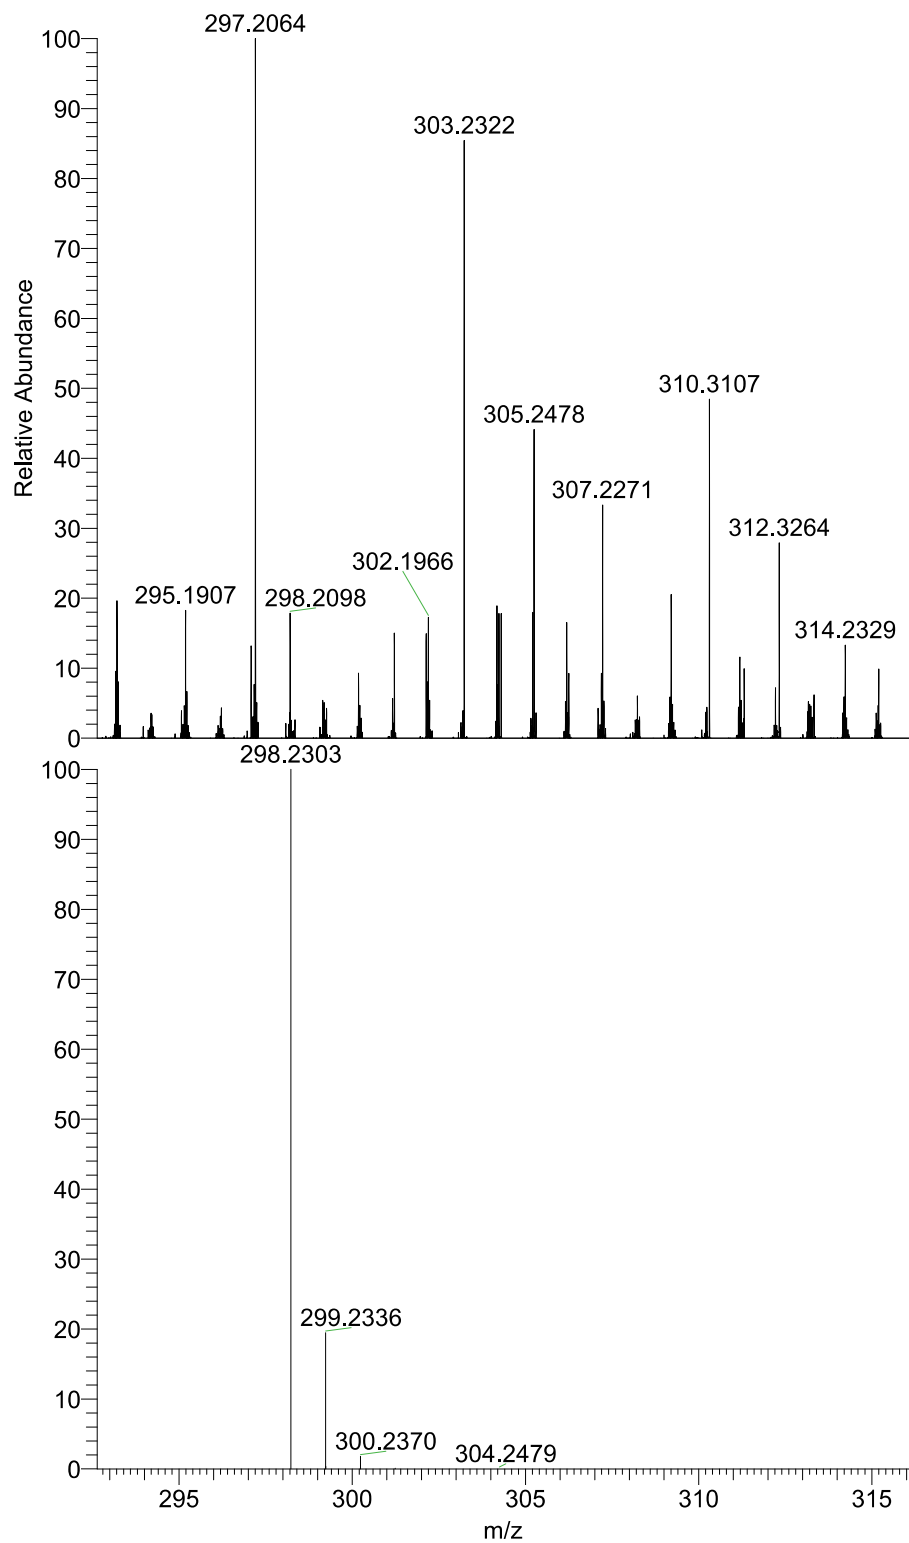

NL:  
1.54E6  
Lectka\_Stefan\_SAH\_G\_FI  
uoro#33-68 RT: 0.23-0.45  
AV: 36 T: FTMS + p ESI  
Full ms  
[100.0000-1500.0000]

NL:  
8.17E5  
 $C_{18}H_{30}O_2F + H$ :  
 $C_{18}H_{31}O_2F_1$   
pa Chrg 1

Fig. S91. High-resolution mass spectrum of compound 16.

T: FTMS + p ESI Full ms [100.0000-1500.0000]

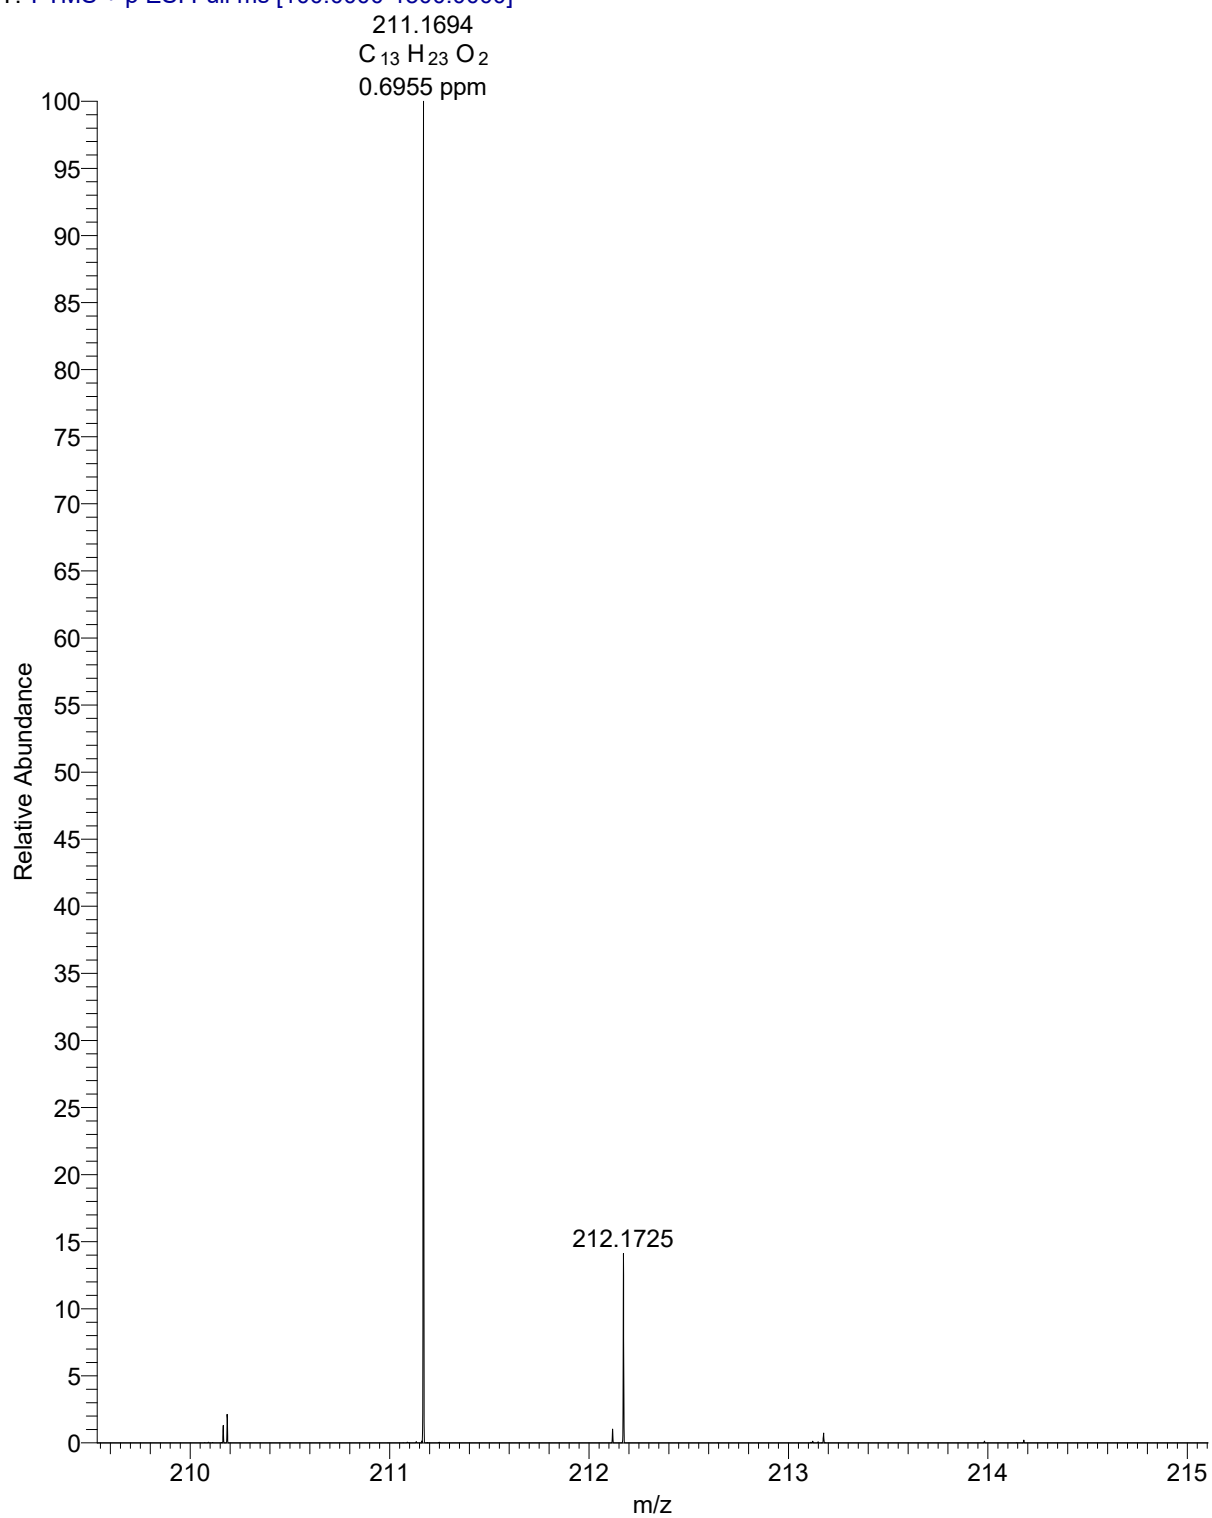

**Fig. S92.** High resolution mass spectrum of the starting material for compound **17**.

T: FTMS + p ESI Full ms [100.0000-1500.0000]

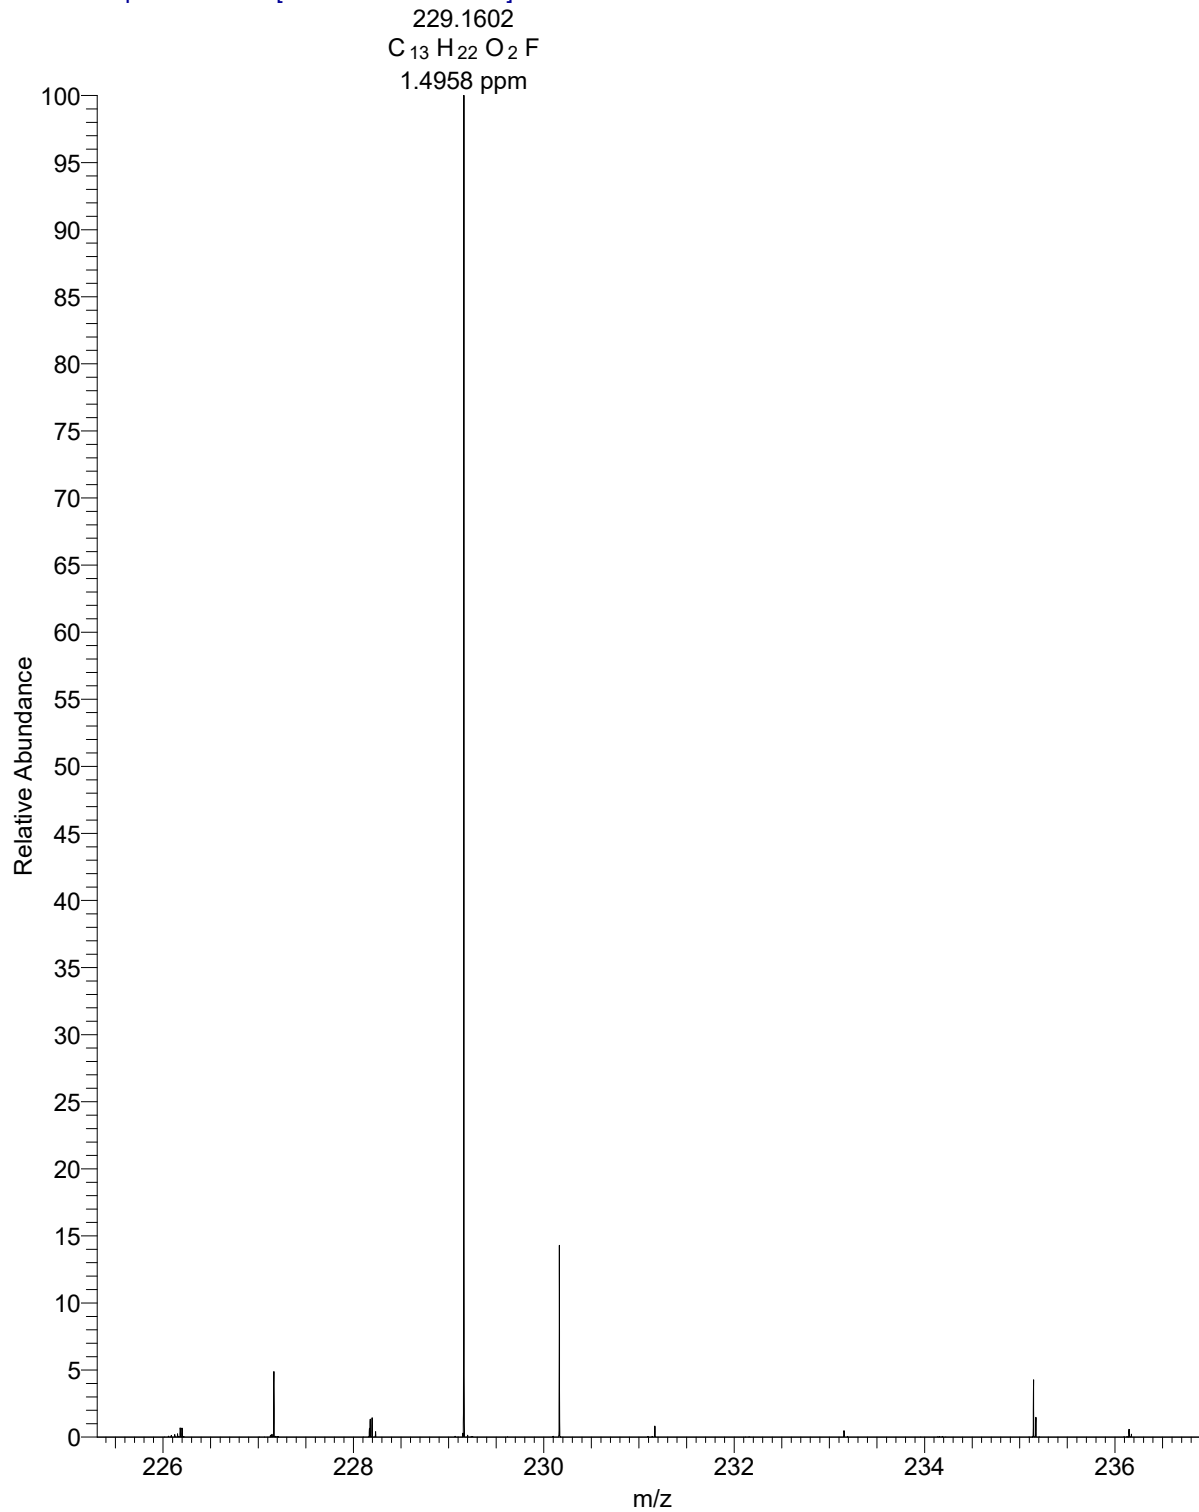

**Fig. S93.** High-resolution mass spectrum of compound **17**.

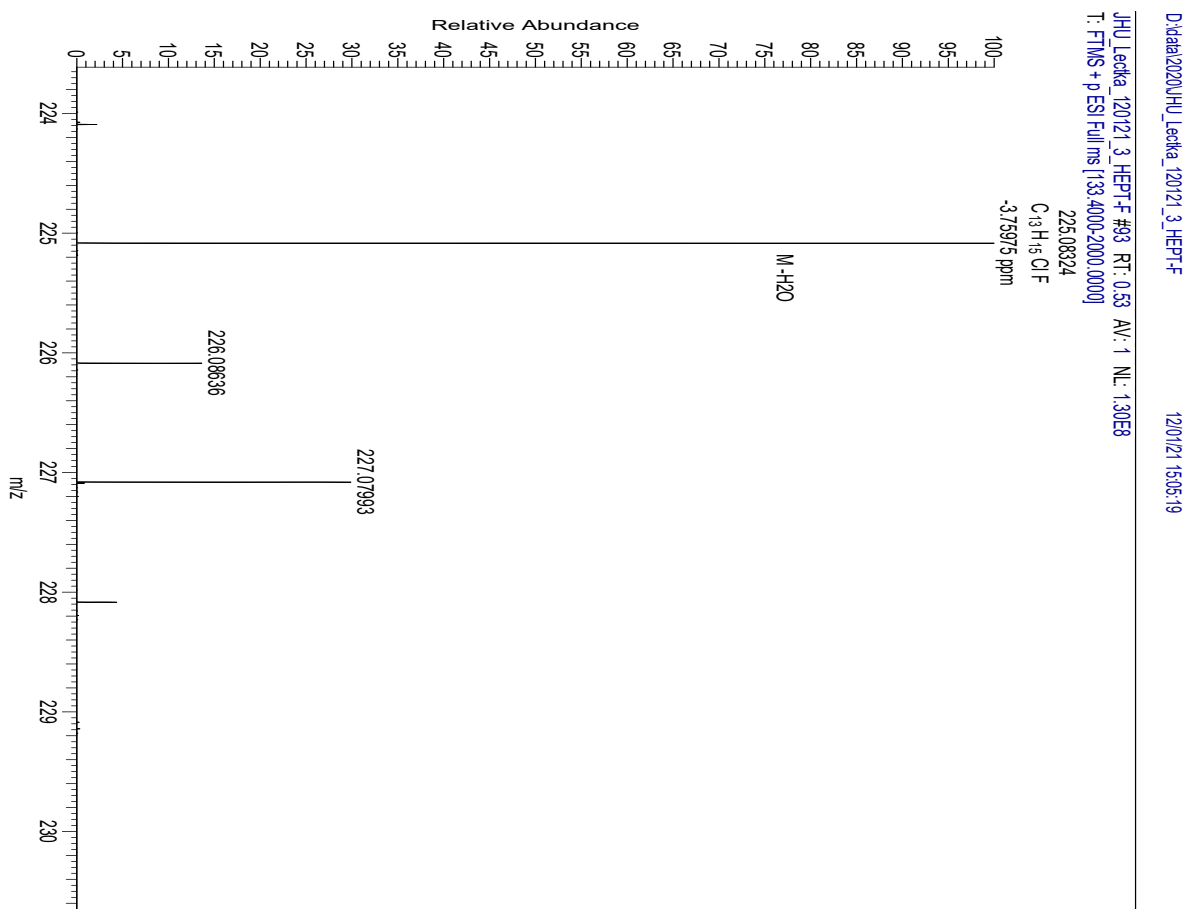

Fig. S94. High-resolution mass spectrum of compound 18.

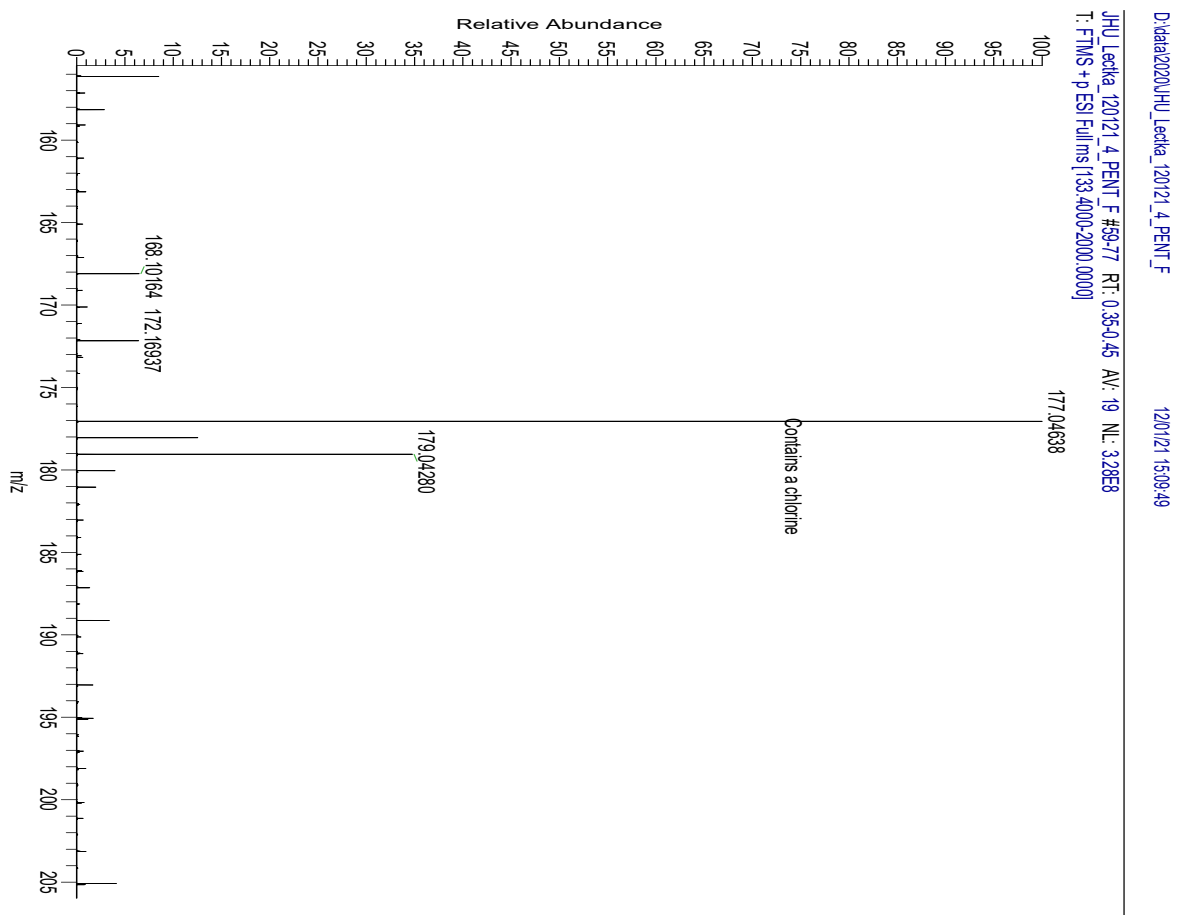

**Fig. S95.** High-resolution mass spectrum of compound **19**.

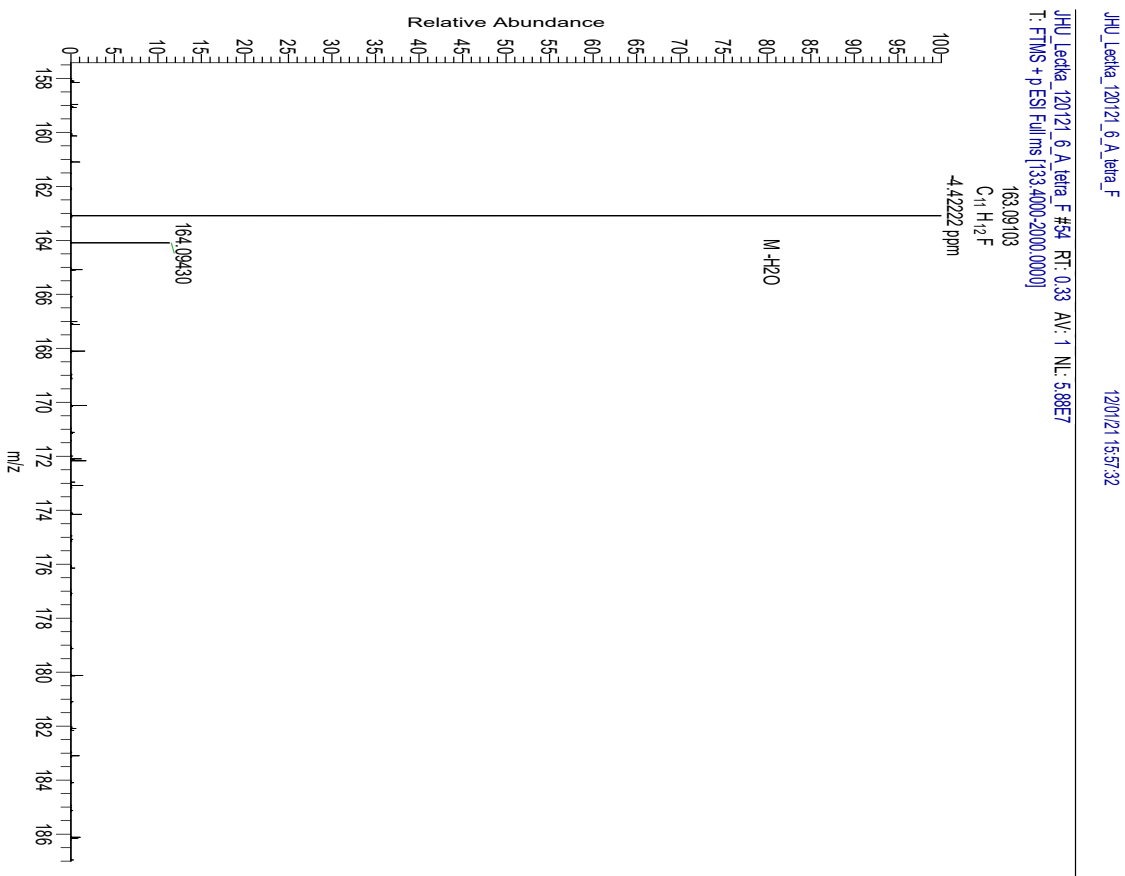

**Fig. S96.** High-resolution mass spectrum of compound **20**.

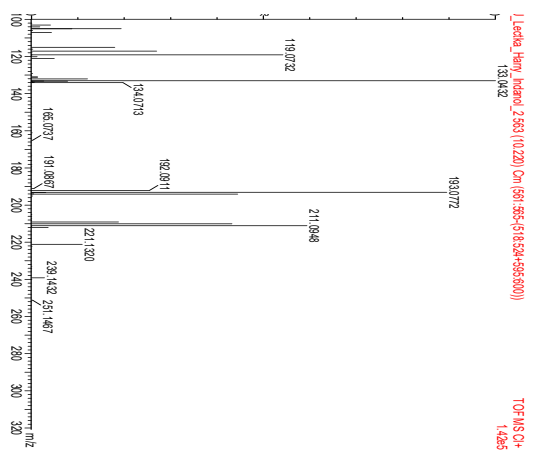

**Fig. S97.** High-resolution mass spectrum for compound **21**.





## Elemental Composition Report

### Single Mass Analysis

Tolerance = 500.0 PPM / DBE: min = -1.5, max = 50.0

Element prediction: Off

Monoisotopic Mass: Odd and Even Electron Ions

4 formula(e) evaluated with 1 results within limits (up to 50 best isotopic matches for each mass)

Elements Used:

C: 10-10 H: 0-100 O: 0-3 F: 1-1

JHU\_Lexika\_Ham\_Ferret\_219 (7.066)

TOF MS CH<sup>+</sup>

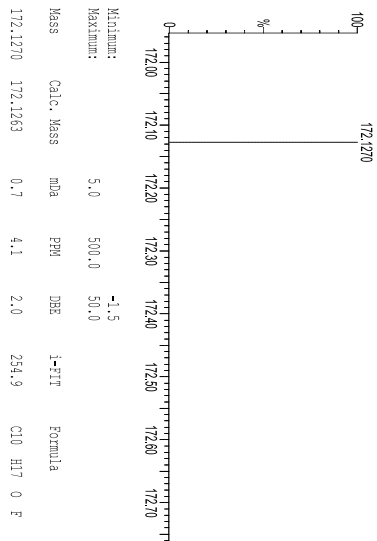

Fig. S98. High-resolution mass spectrum for compound 22.

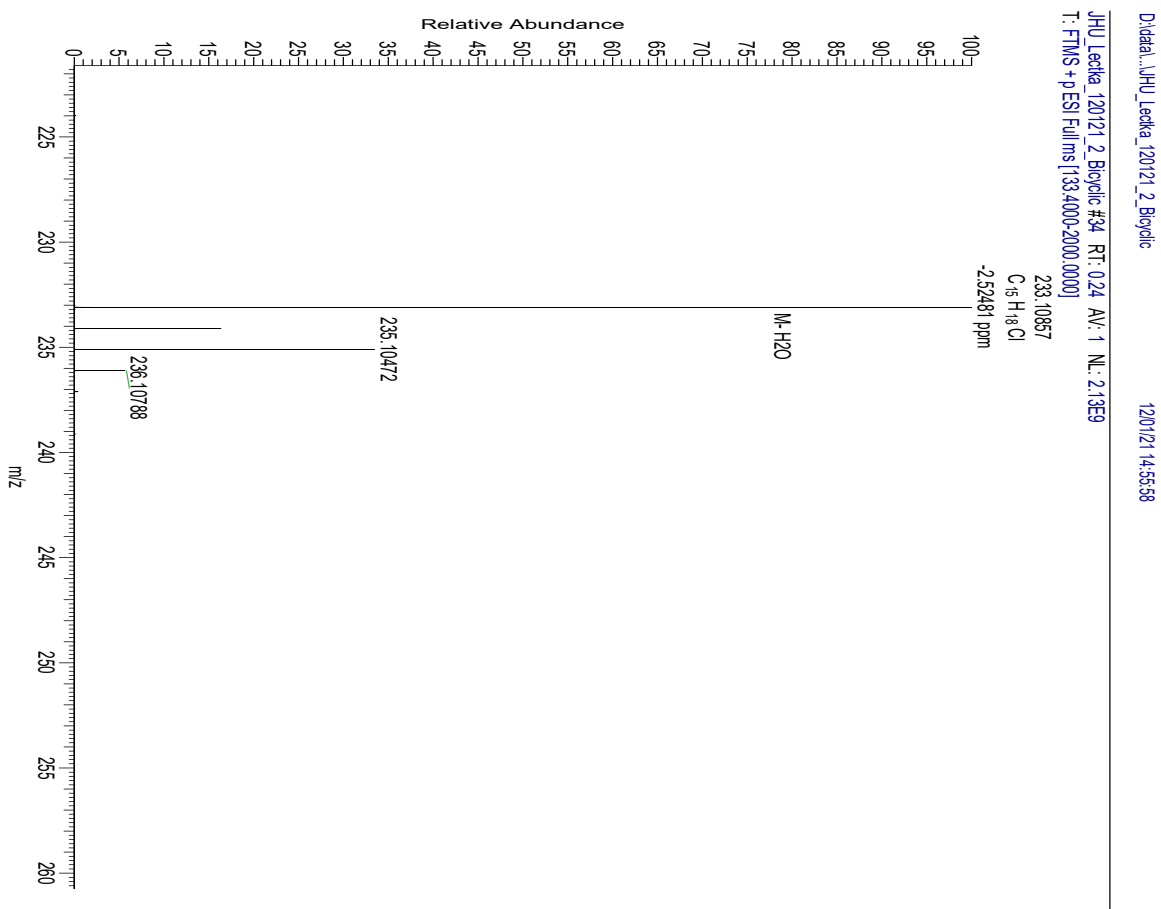

**Fig. S99.** High-resolution mass spectrum of the starting material for compound **23**.

D:\data\2020\JHU\_Lekka\_120121\_1

120121 11:23:13

JHU\_Lekka\_120121\_1 #72 RT: 0.38 AV: 1 NL: 138E8  
T: FTMS + p ESI-Full.ms [13.400-2000.0000]

269.08997

C<sub>6</sub>H<sub>6</sub>ClF<sub>2</sub>

-1.28344 ppm

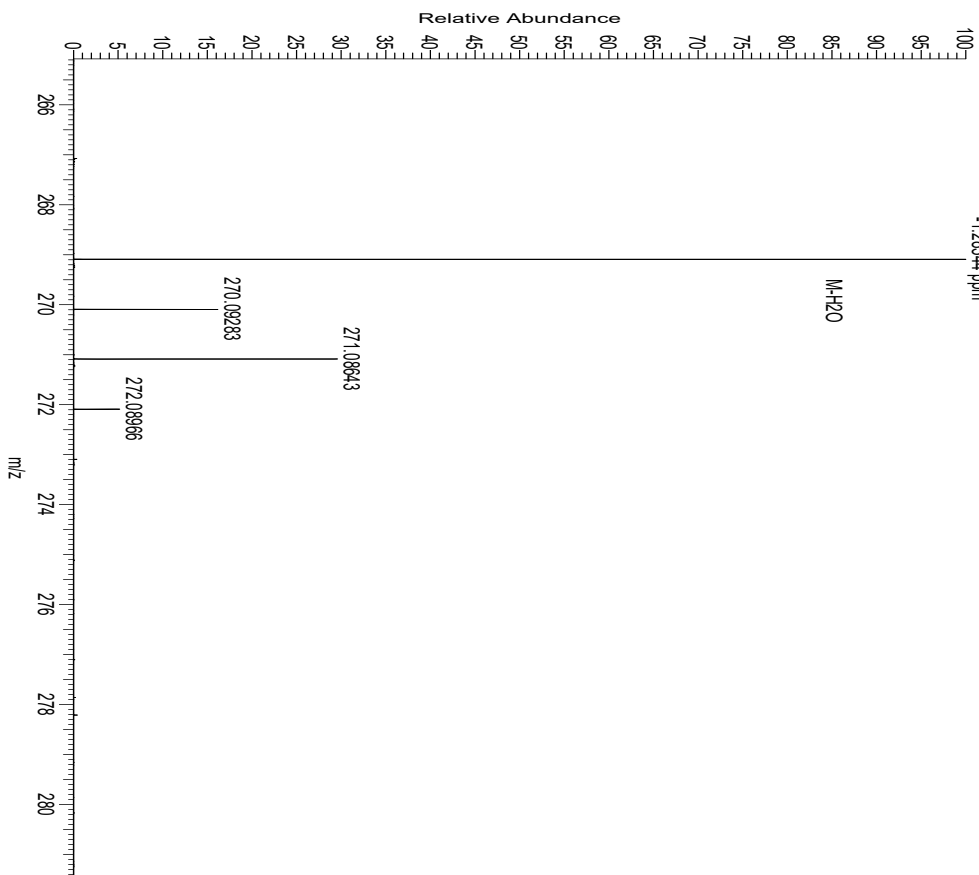

**Fig. S100.** High-resolution mass spectrum of compound **23**.

## References

---

- <sup>1</sup> A. Huczynski, J. Rutkowski, B. Brzezinski, *Struct. Chem.* **2011**, *22*, 627-634.
- <sup>2</sup> M. T. Reetz, S. Stanchev, *J. Chem. Soc. Chem. Commun.* **1993**, *3*, 328-330.
- <sup>3</sup> C. Oberhauser, V. Harms, K. Seidel, B. Schröder, K. Ekramzadeh, S. Beutel, S. Winkler, L. Lauterbach, J. Dickschat, A. Kirschning, *Angew. Chem.* **2018**, *57*, 11802-11806.
- <sup>4</sup> R. Fernandes, D. Chaudhari, *Eur. J. Org. Chem.* **2012**, *10*, 1945-1952.
- <sup>5</sup> C. Karmel, B. Li, J. Hartwig, *J. Am. Chem. Soc.* **2018**, *140*, 1460-1470.
- <sup>6</sup> R. Deslauriers, F. Hasan, B. Lodge, I. Smith, Ian, *J. Pharm. Sci.* **1978**, *67*, 1187-1189.
- <sup>7</sup> R. Fernandes, D. Chaudhari, *Eur. J. Org. Chem.* **2012**, *10*, 1945-1952.
- <sup>8</sup> E. Bratoeff, P. García, Y. Heuze, J. Soriano, A. Mejía, A. Labastida, N. Valencia, M. Cabeza, *Steroids*, **2010**, *75*, 499-505.
- <sup>9</sup> P. Kathe, A. Berkefeld, I. Fleischer, *Synlett* **2021**, *32*, 1629-1632.
- <sup>10</sup> M. Magre, E. Paffenholz, B. Maity, L. Cavallo, M. Rueping, *J. Am. Chem. Soc.* **2020**, *142*, 14286-14294.
- <sup>11</sup> J. Kula, R. Bonikowski, M. Staniszevska, A. Krakowiak, M. Wieczorek, W. Majzner, G. Bujacz, *Eur. J. Org. Chem.* **2002**, *11*, 1826-1829.
- <sup>12</sup> R. Saleem, J. Meinwald, *J. Chem. Soc.* **2000**, *3*, 391-394.
- <sup>13</sup> M. Jackson, C. Moody, P. Shah, *J. Am. Chem. Soc.* **1990**, *11*, 2909-2918.
- <sup>14</sup> T. Duvold, M. Sorensen, F. Bjorkling, A. Henriksen, N. Rastrup-Anderson, *J. Med. Chem.* **2001**, *44*, 3125-3131.
- <sup>15</sup> G. Lee, H. Lee, W. Wang, C. Cherng, *Tetrahedron* **2014**, *70*, 2956-2961.
- <sup>16</sup> D. Özdemirhan, *Synth. Commun.* **2017**, *47*, 629-645.
- <sup>17</sup> C. Nielsen, A. White, D. Sale, J. Bures, A. Spivey, *J. Org. Chem.* **2019**, *84*, 14965-14973.

---

<sup>18</sup> F. Bohlmann, R. Zeisberg, *Org. Mag. Reson.* **1975**, *7*, 426.

<sup>19</sup> E. Hayashi, S. Hara, H. Shirato, T. Hatekeyama, T. Fukuhara, N. Yoneda, *Chem. Lett.* **1995**, *3*, 205-206.
